# Supplementary material for: Trends, prevalence and risk factors of overweight and obesity among women of reproductive age in Bangladesh: a pooled analysis of five national cross-sectional surveys
Source: PubMed Central journal article supplement — BMJ Open. 2018 Jul 19;8(7):e018468. doi: 10.1136/bmjopen-2017-018468 (PMC6059314; doi:10.1136/bmjopen-2017-018468), 2018-07-19

## Supplements

**Table S1.** Variance inflation (VIF) values of final models of urban and rural women, BDHS 1999-2014

| Variables                        | VIF- Urban | VIF-Rural |
|----------------------------------|------------|-----------|
| Age                              | 1.09       | 1.29      |
| Education                        | 2.03       | 1.97      |
| Marital status                   | 1.18       | 1.12      |
| Wealth index                     | 1.49       | 1.69      |
| Watching TV at least once a week | 1.29       | 1.32      |
| Currently working                | 1.08       | 1.04      |
| No. of household members         | 1.04       | 1.05      |
| Contraceptive use                | 1.12       | 1.09      |
| Husband education                | 2.03       | 1.71      |
| Survey year                      | 1.02       | 1.05      |

**Table S2.** Summary characteristics of the sample by survey year, BDHS 1999-2014

| Variable                        | 1999-00 | 2004  | 2007  | 2011  | 2014  |
|---------------------------------|---------|-------|-------|-------|-------|
| Initial sample of the survey, n | 10544   | 11440 | 10996 | 17842 | 17863 |
| BMI available, n                | 5055    | 11176 | 10836 | 17309 | 17683 |
| Pregnant women, n               | 376     | 678   | 709   | 1036  | 1059  |
| Final working sample, n         | 4679    | 10489 | 10127 | 16273 | 16624 |
| Response rate, %                | 96.9    | 98.6  | 98.4  | 97.9  | 97.9  |

**Table S3.** Prevalence of BMI categories of reproductive women by age and place of residence in Bangladesh, BDHS 1999 - 2014

|               |         | Urban                |                      |                      |                      |                      | Rural                |                      |                      |                      |                      |
|---------------|---------|----------------------|----------------------|----------------------|----------------------|----------------------|----------------------|----------------------|----------------------|----------------------|----------------------|
| Age groups    |         | 1999                 | 2004                 | 2007                 | 2011                 | 2014                 | 1999                 | 2004                 | 2007                 | 2011                 | 2014                 |
| Underweight   | 15-24   | 32.75 (28.78, 36.98) | 30.81 (27.83, 33.97) | 27.4 (24.41, 30.61)  | 20.14 (17.89, 22.6)  | 20.99 (18.44, 23.79) | 48.38 (45.86, 50.92) | 38.91 (36.79, 41.08) | 33.95 (31.7, 36.26)  | 34.01 (32.2, 35.87)  | 27.45 (25.42, 29.58) |
|               | 25-34   | 27.16 (23.64, 31)    | 20.91 (18.54, 23.5)  | 17.35 (15.12, 19.83) | 11.23 (9.68, 13)     | 8.34 (6.98, 9.92)    | 45.07 (42.38, 47.79) | 34.26 (32.21, 36.37) | 29.2 (27.08, 31.41)  | 24.12 (22.65, 25.66) | 17.81 (16.16, 19.6)  |
|               | 35-44   | 28.42 (20.42, 38.06) | 21.4 (18.58, 24.51)  | 14.18 (12.04, 16.63) | 9.53 (7.94, 11.4)    | 9.37 (7.69, 11.38)   | 57.48 (52.25, 62.55) | 35.4 (32.99, 37.89)  | 32.94 (30.5, 35.48)  | 24.75 (23.05, 26.53) | 17.98 (16.13, 19.99) |
|               | 45+     | 35.89 (8.84, 76.36)  | 30.27 (25.06, 36.03) | 20.51 (16.36, 25.39) | 12.56 (9.83, 15.92)  | 10.61 (7.61, 14.61)  | 60.97 (42.57, 76.7)  | 42.56 (38.75, 46.46) | 37.24 (33.25, 41.42) | 30.41 (27.56, 33.42) | 23.58 (20.29, 27.22) |
|               | Overall | 29.73 (27.21, 32.39) | 24.84 (23.32, 26.42) | 19.54 (18.17, 20.99) | 13.46 (12.45, 14.54) | 12.2 (11.16, 13.34)  | 48.18 (46.47, 49.91) | 36.89 (35.7, 38.11)  | 32.44 (31.2, 33.71)  | 27.82 (26.91, 28.76) | 21.08 (20.06, 22.15) |
| Normal weight | 15-24   | 50.62 (46.22, 55.01) | 53.21 (49.83, 56.56) | 50.64 (47.17, 54.11) | 53.98 (50.91, 57.02) | 45.47 (42.22, 48.77) | 47.42 (44.89, 49.95) | 53.54 (51.33, 55.74) | 55.29 (52.86, 57.69) | 52.08 (50.14, 54)    | 50.84 (48.49, 53.18) |
|               | 25-34   | 41.45 (37.43, 45.59) | 44.68 (41.65, 47.75) | 41.3 (38.23, 44.45)  | 37.8 (35.15, 40.51)  | 32.71 (30.19, 35.34) | 46.8 (44.08, 49.54)  | 51.15 (48.95, 53.35) | 51.6 (49.21, 53.98)  | 48.32 (46.57, 50.08) | 44.57 (42.49, 46.67) |
|               | 35-44   | 45.09 (35.42, 55.14) | 37.9 (34.44, 41.5)   | 35.36 (32.17, 38.68) | 34 (31.08, 37.05)    | 27.75 (24.94, 30.74) | 35.71 (30.86, 40.88) | 46.98 (44.42, 49.55) | 47.49 (44.83, 50.16) | 47.15 (45.16, 49.15) | 42.17 (39.77, 44.61) |
|               | 45+     | 19.96 (4.12, 59.13)  | 33.66 (28.29, 39.49) | 36.66 (31.3, 42.36)  | 37.87 (33.33, 42.63) | 32.15 (27.54, 37.14) | 35.62 (20.55, 54.2)  | 40.37 (36.59, 44.27) | 41.94 (37.8, 46.2)   | 43.56 (40.47, 46.71) | 41.06 (37.55, 44.66) |
|               | Overall | 45.64 (42.81, 48.51) | 44.47 (42.65, 46.3)  | 41.72 (39.93, 43.53) | 41.39 (39.8, 43)     | 34.72 (33.15, 36.33) | 45.76 (44.03, 47.49) | 49.82 (48.55, 51.08) | 50.72 (49.36, 52.08) | 48.58 (47.56, 49.61) | 45.29 (44.05, 46.53) |
| Overweight    | 15-24   | 14.31 (11.51, 17.65) | 12.51 (10.46, 14.89) | 17.63 (15.1, 20.47)  | 20.18 (17.81, 22.79) | 25.42 (22.67, 28.38) | 3.36 (2.58, 4.37)    | 6.7 (5.67, 7.89)     | 9.56 (8.19, 11.14)   | 11.81 (10.63, 13.1)  | 17.95 (16.33, 19.7)  |
|               | 25-34   | 23.9 (20.55, 27.6)   | 25.73 (23.15, 28.49) | 28.99 (26.19, 31.96) | 35.56 (32.95, 38.26) | 37.7 (35.09, 40.38)  | 6.74 (5.49, 8.24)    | 12.09 (10.72, 13.6)  | 15.66 (14, 17.48)    | 22.03 (20.61, 23.52) | 29.31 (27.47, 31.23) |
|               | 35-44   | 15.79 (9.58, 24.92)  | 26.82 (23.77, 30.11) | 33.17 (30.02, 36.48) | 35.55 (32.57, 38.66) | 37.62 (34.59, 40.74) | 6.1 (4.06, 9.08)     | 15.05 (13.29, 17)    | 15.67 (13.83, 17.71) | 22.4 (20.78, 24.1)   | 30.09 (27.93, 32.34) |
|               | 45+     | 26.19 (3.91, 75.55)  | 23.39 (18.71, 28.83) | 27.28 (22.51, 32.65) | 30.3 (26.11, 34.84)  | 31.21 (26.62, 36.19) | 3.4 (0.47, 20.56)    | 15 (12.32, 18.14)    | 16.66 (13.73, 20.07) | 20.06 (17.69, 22.67) | 27.57 (23.99, 31.47) |
|               | Overall | 19.08 (16.95, 21.42) | 21.87 (20.42, 23.39) | 26.87 (25.28, 28.53) | 30.62 (29.14, 32.14) | 33.74 (32.19, 35.32) | 5.02 (4.33, 5.83)    | 11.35 (10.57, 12.18) | 13.87 (12.96, 14.84) | 18.96 (18.18, 19.78) | 26.24 (25.17, 27.34) |
| Obese         | 15-24   | 2.3 (1.28, 4.1)      | 3.44 (2.4, 4.92)     | 4.31 (3.07, 6.02)    | 5.67 (4.44, 7.22)    | 8.09 (6.49, 10.05)   | 0.82 (0.46, 1.44)    | 0.83 (0.51, 1.35)    | 1.18 (0.75, 1.86)    | 2.08 (1.59, 2.71)    | 3.74 (3.01, 4.64)    |
|               | 25-34   | 7.47 (5.54, 10)      | 8.65 (7.03, 10.6)    | 12.33 (10.41, 14.55) | 15.39 (13.48, 17.52) | 21.23 (18.96, 23.69) | 1.37 (0.86, 2.18)    | 2.47 (1.86, 3.29)    | 3.52 (2.72, 4.55)    | 5.51 (4.76, 6.36)    | 8.28 (7.32, 9.36)    |
|               | 35-44   | 10.68 (5.53, 19.6)   | 13.86 (11.59, 16.48) | 17.26 (14.78, 20.07) | 20.9 (18.41, 23.62)  | 25.24 (22.51, 28.19) | 0.68 (0.17, 2.71)    | 2.56 (1.83, 3.56)    | 3.88 (2.99, 5.02)    | 5.68 (4.83, 6.66)    | 9.74 (8.53, 11.1)    |
|               | 45+     | 17.94 (2.42, 65.83)  | 12.66 (9.27, 17.07)  | 15.53 (11.73, 20.29) | 19.25 (15.73, 23.34) | 26.01 (21.83, 30.67) | NA                   | 2.05 (1.2, 3.49)     | 4.14 (2.69, 6.32)    | 5.94 (4.64, 7.58)    | 7.77 (6.2, 9.69)     |
|               | Overall | 5.52 (4.32, 7.04)    | 8.81 (7.84, 9.88)    | 11.85 (10.71, 13.08) | 14.51 (13.41, 15.69) | 19.32 (18.01, 20.69) | 1.02 (0.72, 1.44)    | 1.92 (1.59, 2.31)    | 2.95 (2.52, 3.45)    | 4.61 (4.2, 5.06)     | 7.37 (6.82, 7.97)    |

**Table S4.** Prevalence of BMI categories of reproductive women by age and place of residence in Bangladesh, BDHS 1999 - 2014 (**International cutoff**)

|               |  | Urban                |                      |                      |                      |                      | Rural                |                      |                      |                      |                      |
|---------------|--|----------------------|----------------------|----------------------|----------------------|----------------------|----------------------|----------------------|----------------------|----------------------|----------------------|
|               |  | 1999                 | 2004                 | 2007                 | 2011                 | 2014                 | 1999-00              | 2004                 | 2007                 | 2011                 | 2014                 |
| Underweight   |  | 32.75 (28.78, 36.98) | 30.81 (27.83, 33.97) | 27.4 (24.41, 30.61)  | 20.14 (17.89, 22.6)  | 20.99 (18.44, 23.79) | 48.38 (45.86, 50.92) | 38.91 (36.79, 41.08) | 33.95 (31.7, 36.26)  | 34.01 (32.2, 35.87)  | 27.45 (25.42, 29.58) |
|               |  | 27.16 (23.64, 31)    | 20.91 (18.54, 23.5)  | 17.35 (15.12, 19.83) | 11.23 (9.68, 13)     | 8.34 (6.98, 9.92)    | 45.07 (42.38, 47.79) | 34.26 (32.21, 36.37) | 29.2 (27.08, 31.41)  | 24.12 (22.65, 25.66) | 17.81 (16.16, 19.6)  |
|               |  | 28.42 (20.42, 38.06) | 21.4 (18.58, 24.51)  | 14.18 (12.04, 16.63) | 9.53 (7.94, 11.4)    | 9.37 (7.69, 11.38)   | 57.48 (52.25, 62.55) | 35.4 (32.99, 37.89)  | 32.94 (30.5, 35.48)  | 24.75 (23.05, 26.53) | 17.98 (16.13, 19.99) |
|               |  | 35.89 (8.84, 76.36)  | 30.27 (25.06, 36.03) | 20.51 (16.36, 25.39) | 12.56 (9.83, 15.92)  | 10.61 (7.61, 14.61)  | 60.97 (42.57, 76.7)  | 42.56 (38.75, 46.46) | 37.24 (33.25, 41.42) | 30.41 (27.56, 33.42) | 23.58 (20.29, 27.22) |
|               |  | 29.73 (27.21, 32.39) | 24.84 (23.32, 26.42) | 19.54 (18.17, 20.99) | 13.46 (12.45, 14.54) | 12.2 (11.16, 13.34)  | 48.18 (46.47, 49.91) | 36.89 (35.7, 38.11)  | 32.44 (31.2, 33.71)  | 27.82 (26.91, 28.76) | 21.08 (20.06, 22.15) |
| Normal weight |  | 60.28 (55.93, 64.48) | 60.8 (57.48, 64.02)  | 62.4 (58.97, 65.72)  | 66.43 (63.53, 69.2)  | 59.81 (56.54, 62.98) | 49.84 (47.3, 52.37)  | 58.05 (55.85, 60.21) | 61.86 (59.48, 64.18) | 59.97 (58.06, 61.85) | 61.91 (59.64, 64.13) |
|               |  | 55.78 (51.59, 59.89) | 57.51 (54.44, 60.52) | 56.31 (53.15, 59.41) | 57.53 (54.77, 60.23) | 51.95 (49.19, 54.7)  | 51.45 (48.72, 54.17) | 59.71 (57.54, 61.85) | 60.19 (57.82, 62.51) | 61.03 (59.3, 62.73)  | 60.12 (58.05, 62.16) |
|               |  | 53.39 (43.32, 63.19) | 50.67 (47.04, 54.3)  | 52.6 (49.17, 56)     | 51.3 (48.14, 54.45)  | 44.95 (41.78, 48.16) | 39.23 (34.25, 44.44) | 56.17 (53.61, 58.7)  | 57.42 (54.77, 60.02) | 61.14 (59.16, 63.07) | 59.66 (57.26, 62.01) |
|               |  | 19.96 (4.12, 59.13)  | 43.23 (37.44, 49.21) | 50.28 (44.61, 55.94) | 52.82 (48.04, 57.55) | 45.45 (40.36, 50.64) | 35.62 (20.55, 54.2)  | 50.06 (46.14, 53.98) | 54.54 (50.29, 58.72) | 55.41 (52.25, 58.52) | 56.51 (52.71, 60.24) |
|               |  | 57.4 (54.54, 60.21)  | 55.43 (53.6, 57.24)  | 56.33 (54.52, 58.14) | 57.89 (56.29, 59.47) | 51.49 (49.82, 53.16) | 49.17 (47.44, 50.9)  | 57.33 (56.08, 58.57) | 59.43 (58.09, 60.75) | 60.14 (59.13, 61.15) | 60.11 (58.89, 61.32) |
| Overweight    |  | 5.82 (4.11, 8.17)    | 6.59 (5.15, 8.41)    | 8.67 (6.88, 10.86)   | 11.08 (9.32, 13.12)  | 15.63 (13.42, 18.13) | 1.28 (0.82, 2.01)    | 2.91 (2.25, 3.75)    | 3.82 (2.96, 4.91)    | 5.34 (4.55, 6.25)    | 9.52 (8.33, 10.87)   |
|               |  | 14.07 (11.39, 17.26) | 17.65 (15.41, 20.15) | 21.33 (18.84, 24.05) | 24.61 (22.29, 27.09) | 31.22 (28.7, 33.85)  | 2.95 (2.14, 4.05)    | 5 (4.13, 6.05)       | 9.64 (8.32, 11.15)   | 13.06 (11.92, 14.29) | 19.1 (17.61, 20.68)  |
|               |  | 13.61 (7.8, 22.66)   | 22.23 (19.39, 25.35) | 25.93 (23.03, 29.06) | 30.21 (27.36, 33.23) | 33.2 (30.3, 36.23)   | 3.28 (1.86, 5.7)     | 7.67 (6.37, 9.21)    | 8.91 (7.5, 10.55)    | 12.01 (10.77, 13.37) | 18.54 (16.79, 20.42) |
|               |  | 44.14 (12.09, 81.39) | 21.23 (16.77, 26.51) | 21.68 (17.25, 26.88) | 24.62 (20.76, 28.93) | 30.73 (26.28, 35.57) | 3.4 (0.47, 20.56)    | 6.38 (4.69, 8.62)    | 7.07 (5.22, 9.52)    | 11.55 (9.72, 13.67)  | 17.18 (14.72, 19.95) |
|               |  | 10.57 (8.92, 12.47)  | 15.87 (14.59, 17.23) | 19.18 (17.78, 20.66) | 22.25 (20.93, 23.63) | 27.56 (26.11, 29.06) | 2.19 (1.73, 2.77)    | 5.1 (4.57, 5.69)     | 7.39 (6.71, 8.13)    | 10.39 (9.79, 11.03)  | 16.14 (15.3, 17.02)  |
| Obese         |  | 1.13 (0.49, 2.59)    | 1.78 (1.05, 2.99)    | 1.51 (0.85, 2.66)    | 2.33 (1.58, 3.43)    | 3.55 (2.47, 5.07)    | 0.48 (0.23, 0.99)    | 0.12 (0.03, 0.39)    | 0.36 (0.15, 0.81)    | 0.66 (0.4, 1.08)     | 1.1 (0.75, 1.6)      |
|               |  | 2.97 (1.81, 4.84)    | 3.9 (2.85, 5.32)     | 4.99 (3.83, 6.49)    | 6.61 (5.34, 8.16)    | 8.48 (6.98, 10.25)   | 0.51 (0.22, 1.13)    | 1.01 (0.63, 1.59)    | 0.95 (0.55, 1.64)    | 1.77 (1.37, 2.29)    | 2.95 (2.37, 3.67)    |
|               |  | 4.56 (1.61, 12.27)   | 5.68 (4.25, 7.54)    | 7.27 (5.66, 9.28)    | 8.94 (7.26, 10.96)   | 12.46 (10.37, 14.9)  | .                    | 0.74 (0.4, 1.37)     | 0.72 (0.4, 1.29)     | 2.08 (1.59, 2.72)    | 3.81 (3.04, 4.76)    |
|               |  | .                    | 5.25 (3.2, 8.51)     | 7.51 (4.96, 11.21)   | 9.98 (7.38, 13.36)   | 13.18 (10.08, 17.06) | .                    | 0.99 (0.43, 2.26)    | 1.13 (0.49, 2.58)    | 2.61 (1.78, 3.81)    | 2.71 (1.88, 3.9)     |
|               |  | 2.28 (1.54, 3.38)    | 3.85 (3.21, 4.61)    | 4.93 (4.2, 5.78)     | 6.38 (5.63, 7.23)    | 8.72 (7.79, 9.76)    | 0.43 (0.25, 0.74)    | 0.65 (0.47, 0.9)     | 0.72 (0.52, 1.01)    | 1.62 (1.38, 1.9)     | 2.64 (2.31, 3.03)    |

**Figure S1.** Prevalence of BMI categories International cutoff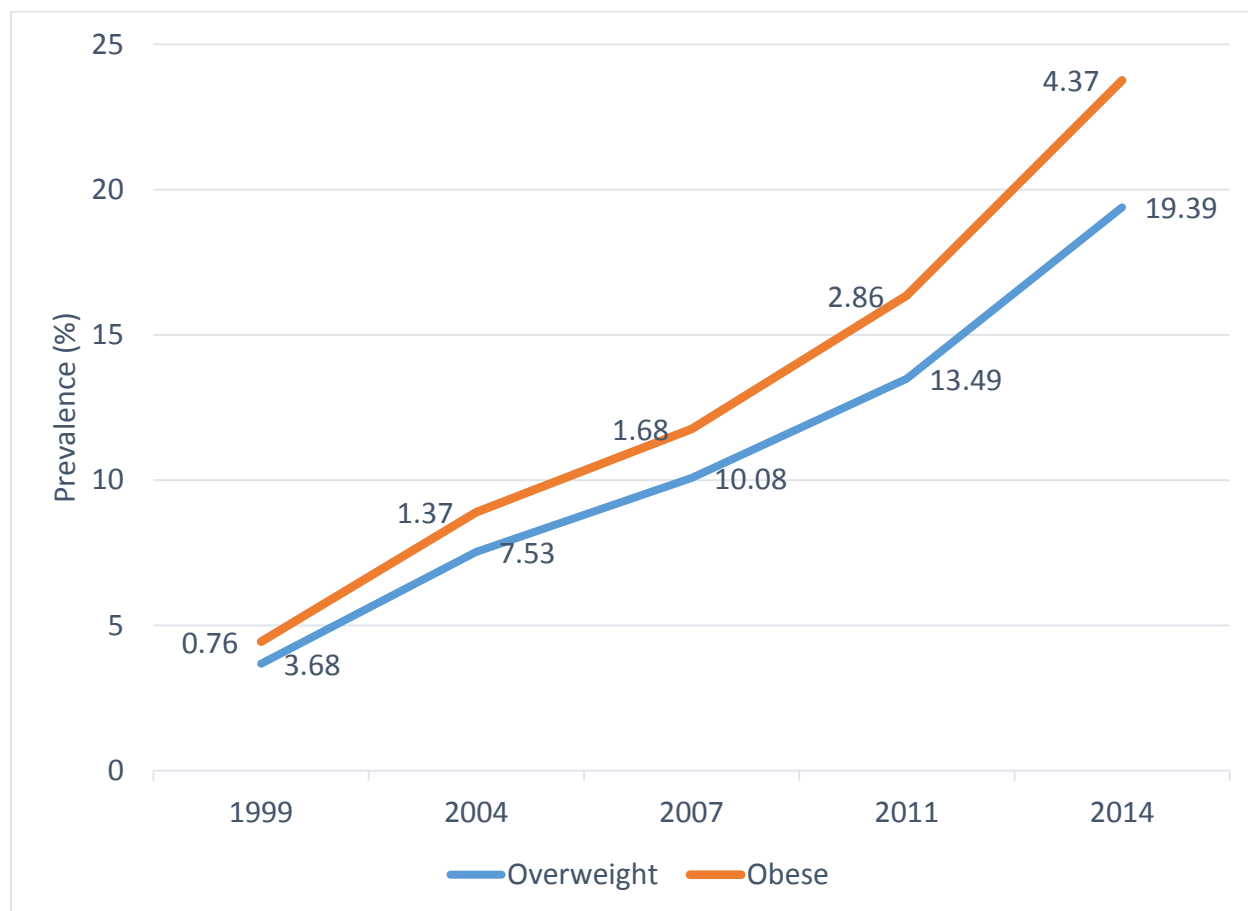

**Figure S2.** Prevalence of underweight, normal, overweight, and obesity by year and place of residence BDHS 1999-2014 (International cutoff).

(a) Urban

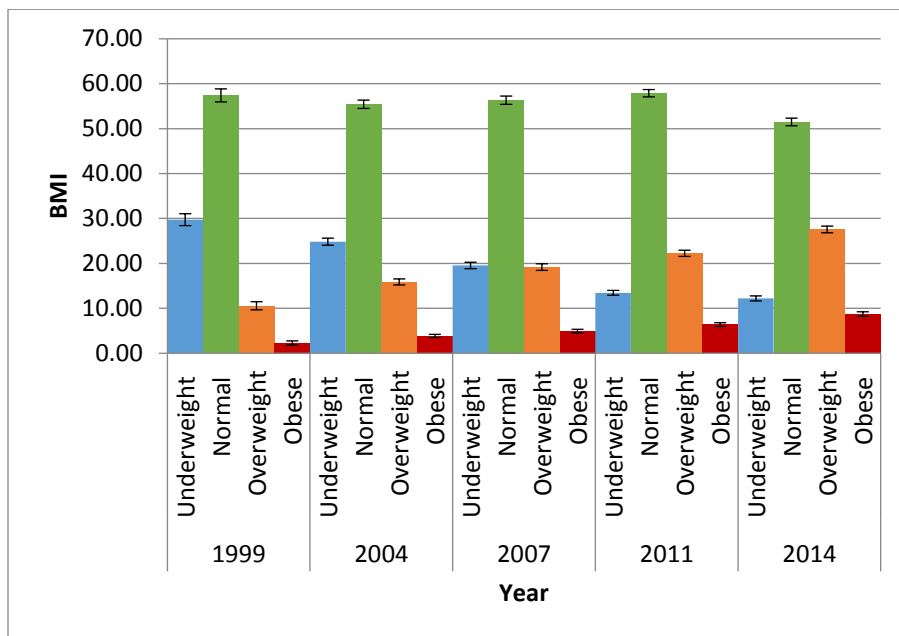

(b) Rural

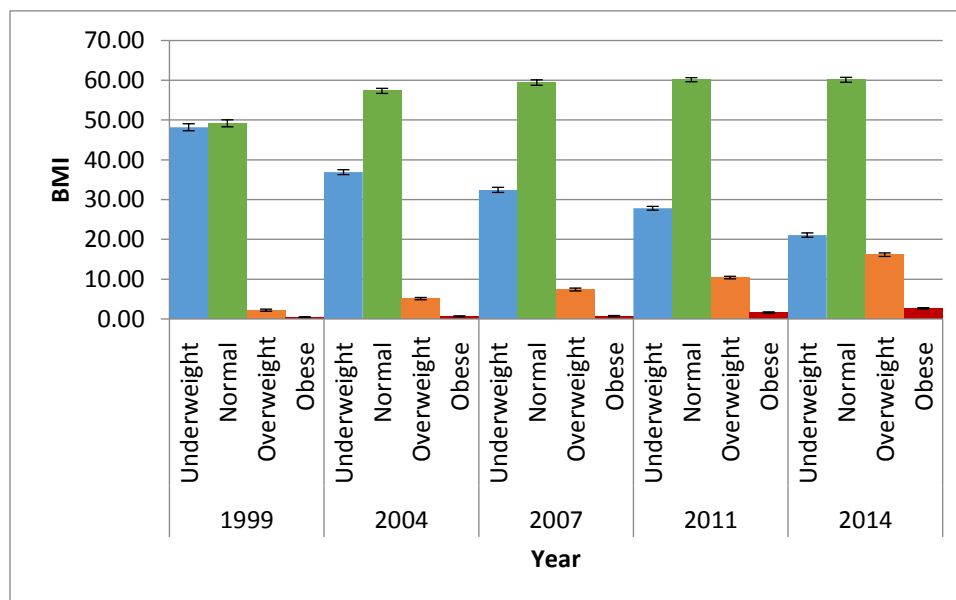

Supplement: bmjopen-2017-018468supp001.pdf [file bmjopen-2017-018468supp001.pdf]
