# Supplementary material for: Trends, prevalence and risk factors of overweight and obesity among women of reproductive age in Bangladesh: a pooled analysis of five national cross-sectional surveys
Source: PubMed Central journal article supplement — BMJ Open. 2018 Jul 19;8(7):e018468. doi: 10.1136/bmjopen-2017-018468 (PMC6059314; doi:10.1136/bmjopen-2017-018468), 2018-07-19
Supplement: bmjopen-2017-018468.draft_revisions.pdf [file bmjopen-2017-018468.draft_revisions.pdf]

# BMJ Open

BMJ Open is committed to open peer review. As part of this commitment we make the peer review history of every article we publish publicly available.

When an article is published we post the peer reviewers' comments and the authors' responses online. We also post the versions of the paper that were used during peer review. These are the versions that the peer review comments apply to.

The versions of the paper that follow are the versions that were submitted during the peer review process. They are not the versions of record or the final published versions. They should not be cited or distributed as the published version of this manuscript.

BMJ Open is an open access journal and the full, final, typeset and author-corrected version of record of the manuscript is available on our site with no access controls, subscription charges or pay-per-view fees (<http://bmjopen.bmj.com>).

If you have any questions on BMJ Open's open peer review process please email [info.bmjopen@bmj.com](mailto:info.bmjopen@bmj.com)

# BMJ Open

## Trends, prevalence, and risk factors in overweight and obesity among women of reproductive age in Bangladesh, 1999-2014

|                                 |                                                                                                                                                                                                                               |
|---------------------------------|-------------------------------------------------------------------------------------------------------------------------------------------------------------------------------------------------------------------------------|
| Journal:                        | <i>BMJ Open</i>                                                                                                                                                                                                               |
| Manuscript ID                   | bmjopen-2017-018468                                                                                                                                                                                                           |
| Article Type:                   | Research                                                                                                                                                                                                                      |
| Date Submitted by the Author:   | 04-Jul-2017                                                                                                                                                                                                                   |
| Complete List of Authors:       | Chowdhury, Muhammad Abdul Baker; University of Florida Adnan, Md. Mohiuddin; Georgia Southern University, Biostatistics Hassan, Md Zakiul; International Centre for Diarrhoeal Disease Research, Infectious Diseases Division |
| <b>Primary Subject Heading</b>: | Epidemiology                                                                                                                                                                                                                  |
| Secondary Subject Heading:      | Epidemiology, Public health                                                                                                                                                                                                   |
| Keywords:                       | obesity, reproductive women, body mass index, trends, risk factors                                                                                                                                                            |
|                                 |                                                                                                                                                                                                                               |

SCHOLARONE™  
Manuscripts

## Trends, prevalence, and risk factors in overweight and obesity among women of reproductive age in Bangladesh, 1999-2014

Muhammad Abdul Baker Chowdhury<sup>a,\*</sup>, MPH, MPS, M.Sc.; Md. Mohiuddin Adnan<sup>c</sup>, M.Sc.; Zakiul Hassan<sup>b</sup>, MBBS

### Author affiliation

<sup>a</sup> Clinical Biostatistician, Department of Emergency Medicine, College of Medicine, University of Florida, Gainesville, FL 32610, USA, Phone: 352.265.5911(Ext:31458)

<sup>b</sup> Graduate Research Assistant, Infectious Disease & Digital Epidemiology, Jiann-Ping Hsu College of Public Health, Georgia Southern University, Statesboro, GA 30458 USA, Phone: (912) 541-3572

<sup>c</sup> Research Investigator, Programme for Emerging Infections, Infectious Diseases Division, International Centre for Diarrhoeal Disease Research (icddr, b), Bangladesh, Phone: +88 02 8860523- 32 (Extension: 2547); Mobile: +8801753866573

\* Corresponding author

### Author email address (s)

MC: [mchow023@fiu.edu](mailto:mchow023@fiu.edu) , [chowdhurym@ufl.edu](mailto:chowdhurym@ufl.edu)

MA: [ma04541@georgiasouthern.edu](mailto:ma04541@georgiasouthern.edu)

ZH: [zhassan@icddr.org](mailto:zhassan@icddr.org)

## Abstract

**Objective:** To determine trends in prevalence and risk factors of overweight and obesity among Bangladeshi reproductive age women during 1999-2014.

**Design:** Nationally representative data from repeated cross-sectional Bangladesh Demographic and Health Survey (BDHS) in 1999, 2004, 2007, 2011, and 2014 were analyzed.

**Setting:** Country of Bangladesh.

**Participants:** Women age 15- 49 years.

**Main outcome measures:** The primary outcome was the study participants' body mass index (BMI).

**Results:** A total of 58,192 women whose body mass index (BMI) was available were included in the analysis. The prevalence of overweight and obesity among reproductive age women increased significantly from 7.53% (95% CI: 6.83, 8.29) and 1.82% (CI: 1.48, 2.24) in 1999 to 28.37% (CI: 27.49, 29.28) and 10.77% (CI: 10.22, 11.35) in 2014, respectively. Age, education, wealth index, watching TV, and contraceptive use were associated with overweight and obesity in both urban and rural areas.

**Conclusions:** Overweight and obesity prevalence increased significantly among Bangladeshi reproductive age women. Developing effective low cost strategies to address the increasing burden of obesity are high priority.

### Strengths and limitations of this study

- To our knowledge, this is the first study in Bangladesh to compare long-term (15 years) trends in prevalence and risk factors associated with overweight/obesity in rural and urban women using nationally representative data
- The study compared World Health Organization (WHO) recommended Asian standard BMI classification with International BMI classification, which is lacking in prior studies. The prevalence of overweight and obesity using the Asian-specific guidelines was 2.10 to 2.5 times higher than prevalence estimates based on the international guidelines.
- Analysis accounted for complex survey design (clustering, stratification, weights) which gives accurate estimates for the country population. Survey year as a predictor for the first time in Bangladeshi population which provides incremental change in BMI over time
- The surveys did not include data on diet, fruits, and vegetables intake and physical activity, which are important predictors of overweight, and obesity. Results not replicable for older women's and no data for men

## Introduction

Obesity is a growing global public health concern <sup>1</sup>. An estimated two billion adults were reported to have overweight or obesity in 2014 with a worldwide prevalence of 39% <sup>1,2</sup>. Obesity increases the risk of many serious chronic health condition such as hypertension, prediabetes, type 2 diabetes, dyslipidemia, cardiovascular diseases (CVDs), certain cancers, and metabolic syndrome <sup>2-4</sup>. With a J-shaped (slight upward trend with a low BMI and steep increase with higher BMI) relationship between body mass index(BMI) and mortality, obesity has a high risk of mortality <sup>5</sup>.

While the impact of overweight and obesity epidemic in developed countries has been highlighted <sup>6</sup>, recent studies demonstrate that the prevalence of obesity has increased significantly in many developing countries <sup>7</sup>. It has been projected that the trend of overweight and obesity will continue to rise in the developing world <sup>8</sup>. Bangladesh, a low-income country in South East Asian region, has also observed an increasing prevalence of overweight and obesity. Like many developing countries, Bangladesh has experienced demographic and nutritional changes amongst the population such as changing lifestyle (e.g. high calorie food intake, sedentary life style) and urbanization. The rate of serious chronic health conditions in Bangladesh has increased steadily and death attributable to chronic conditions climbed from 8% in 1986 to 68% in 2006 <sup>6</sup>. Traditionally, infectious diseases <sup>9</sup> and under-nutrition <sup>10</sup> were major public health problems in the country and less attention has focused on overweight and obesity by public health officials.

1  
2  
3 Data on the overweight and obesity trend in Bangladesh are sparse. Few of the studies that  
4 reported the prevalence of obesity were cross-sectional and data were limited to one year or  
5 less <sup>11</sup> and included only a specific group of participants (e.g. diabetic patients, schoolchildren  
6 etc.) <sup>12</sup>. Further, the change in sociodemographic factors associated with rising incidence of  
7 overweight and obesity in Bangladesh has not been well studied. Moreover, the scale to  
8 determine BMI categories varied widely in prior studies and most used scales other than the  
9 World Health Organization (WHO) recommended Asian standard BMI classification.  
10  
11  
12  
13  
14  
15  
16  
17  
18  
19  
20  
21  
22

23 Overweight and obesity vary significantly between men and women <sup>13</sup>. Reproductive-age  
24 women have higher rates of overweight and obese and are more adversely affected by obesity-  
25 related complications <sup>14</sup>. This gender difference is mainly due to general weight gain during the  
26 child bearing years, gestational weight gain and/or weight retention and adverse lifestyle, risk  
27 factors associated with pregnancy and the postpartum period <sup>15</sup>. Maternal obesity increases the  
28 risk of numerous complications of pregnancy, labor, and birth for both mother and neonate,  
29 including diabetes and hypertensive disorders <sup>14,16</sup>. Compared with normal weight, maternal  
30 overweight is associated with a higher risk of cesarean delivery and a higher incidence of  
31 anesthetic and postoperative complications <sup>17</sup>. Low Apgar scores, macrosomia, and neural tube  
32 defects are also more frequent in infants of obese mothers than in infants of normal-weight  
33 mothers <sup>17</sup>.  
34  
35  
36  
37  
38  
39  
40  
41  
42  
43  
44  
45  
46  
47  
48  
49  
50  
51

52 Understanding the obesity trend and identifying modifiable sociodemographic factors  
53 responsible for overweight and obesity among this high-risk group may help design feasible  
54  
55  
56  
57  
58  
59  
60

1  
2  
3 public health interventions to reduce the burden of obesity and associated adverse health  
4  
5 outcomes. We, therefore, used nationally representative data from the Bangladesh  
6  
7 Demographic and Health Survey (BDHS) to estimate the trends in overweight and obesity and  
8  
9 to identify socio-demographic factors associated with overweight and obesity among  
10  
11 reproductive-age women in Bangladesh over a 15-year period between 1999 and 2014.  
12  
13  
14

## 15 **Methods**

### 16 *Data sources*

17  
18 We analyzed publicly available data from the 1999, 2004, 2007, 2011, and 2014 BDHS. The  
19  
20 BDHS is a nationally representative series of cross-sectional surveys of the non-institutionalized  
21  
22 Bangladeshi population. It was developed over decades, progressively adopting standardized  
23  
24 demographic and health survey questionnaire items designed to provide data for monitoring  
25  
26 the population and health situation in Bangladesh since 1993 <sup>18</sup>.  
27  
28  
29

### 30 *Sampling design and sample size*

31  
32 All BDHS surveys used a two-staged stratified sampling procedure. The first stage involved the  
33  
34 selection of clusters consisting of enumeration areas using systematic random sampling based  
35  
36 on probability proportional to population size which was based on the master sampling frame  
37  
38 of the 2001 and 2011 population and housing census prepared by the Bangladesh Bureau of  
39  
40 Statistics <sup>19</sup>. The second stage involved a household listing operation in all selected clusters,  
41  
42 followed by the systematic random sampling of the households listed in each cluster. The  
43  
44 details of the BDHS methods are available elsewhere <sup>18</sup>. The surveys include 10544, 11440,  
45  
46 10996, 17842, and 17863 women, from 1999, 2004, 2007, 2011, and 2014 survey year,  
47  
48 respectively. We excluded participants below 15 years of age, participants with missing values  
49  
50  
51  
52  
53  
54  
55  
56  
57  
58  
59  
60



1  
2  
3 for measured height and weight, and women who were pregnant at the time of the survey.

4  
5  
6 After applying exclusion criteria, the total sample consisted of 58,192 women.

### 7 8 *Outcome*

9  
10 The outcome variable of this study was BMI calculated as weight in kilograms divided by height  
11 in meters squared. In our main analysis, we used BMI classifications recommended by WHO for  
12 Asian population: normal weight (18.5 to <23.0), moderate risk or overweight (23.0 to <27.5),  
13 and high risk or obese ( $\geq 27.5$ )<sup>20</sup>. We also conducted analyses using WHO and National Institutes  
14 of Health BMI classification for the general population: underweight (<18.5), normal weight  
15 (18.5 to <25.0), overweight (25.0 to <30.0), and obese ( $\geq 30.0$ )<sup>21</sup>.  
16  
17  
18  
19  
20  
21  
22  
23  
24

### 25 *Covariates*

26  
27 We choose covariate hypothesized to be associated with overweight and obesity based on  
28 literature review. Socio-demographic characteristics included age (15-24, 25-34, 35-44, and  
29 45+), marital status (married, not married), education (no education, primary, secondary, and  
30 higher), place of residence (rural, urban), geographic region south (Barishal), southeast  
31 (Chittagong), central (Dhaka), west (Khulna), mid-western corner (Rajshahi), northwest  
32 (Rangpur), and east (Sylhet), wealth index (poorest, poorer, middle, rich, and richest),  
33 employment status (yes, no), watching TV at least once a week (yes or no), number of living  
34 children (0, 1-2, 3-4, and  $\geq 5$ ), number of household members (1-2, 3-4, and  $\geq 5$ ), contraceptive  
35 use (not using any method, using pill, and other methods), and survey year. Survey year was  
36 treated as categorical variable.  
37  
38  
39  
40  
41  
42  
43  
44  
45  
46  
47  
48  
49  
50  
51  
52  
53  
54  
55  
56  
57  
58  
59  
60

### *Statistical analysis*

Descriptive statistics (e.g. mean, frequencies) were calculated to define the characteristics of the participants for the survey years. All five surveys were this appended given that a similar survey protocol in terms of design, scope, coverage, sampling, data collection, coding, and weighting was used across surveys. This approach simplified reporting estimates and improved statistical power of the analyses. The distributions of BMI at each survey year was presented and compared with rural and urban population using kernel density plots. The trend over the 15-year period of BMI was assessed by linear regression with time interval (survey year) as primary predictor. The nature, strength, and direction of the association between the women's socio-demographic characteristics and the BMI categories was assessed using multinomial logistic regression models with adjusted risk ratios (ARR) and 95% confidence intervals (CI) for urban and rural study participants separately. All analysis was performed using the statistical software, StataMP13.0 version (StataCorp LP, College Station, TX). The "svy" procedures were used to adjust for the sample stratification and clustering effect in all further analyses at the time of each survey. We used forward, backward and stepwise model selection procedures to select the best predicting model. Variance inflation factor was also calculated to check the collinearity of the predictor variables and the outcome for both urban and rural sample (TableS4).

### *Ethical approval and consent*

All BDHS surveys received ethical approval from ICF Macro Institutional Review Board, Maryland, USA and National Research Ethics Committee of Bangladesh Medical Research Council, Dhaka, Bangladesh. All study participants provided written informed consent.

## Results

### *Socio-demographic characteristics*

A total of 68,685 women participated across the five surveys. BMI data was available for 62,059 study participants and the response rates of the survey ranged between 96.9 and 98.6% from 1999 to 2014 (**TableS1**). We examined the changes in the shape of BMI distributions among Bangladeshi reproductive-age women between 1999, 2004, 2007, 2011, and 2014 using Kernel density plot by urban and rural areas (**Figure 1**). Both urban and rural BMI distribution curves appear to be skewed to the right over the 15-year period indicating a gradual increase in BMI.

**Table 1** shows the socioeconomic and demographic characteristics of the study participants across survey years. Over time, the mean age of study participants increased from 25 ( $\pm 6.63$ ) to 32 ( $\pm 9.12$ ) years. There was a significant reduction in the proportion of women with no education from 45 to 26% ( $p < 0.001$ ) between 1999 and 2014. Similarly, the proportion of women with higher education increased almost two-fold (4.19% to 8.32%). The frequency of watching television increased approximately 1.6 times and the proportion of working women almost doubled (18.81 vs. 34.15%) over the study period. There was a significant change in the family structure during the study period. Five or more living children per women dropped from 12.63% to 8.11%.

### *Trends in overweight and obesity*

Trends in overweight and obesity prevalence over the study period is presented in **Figure 2**. The overall prevalence of overweight-increased almost four fold (7.53 to 28.37%) and prevalence of obesity increased almost five-fold (1.82 to 10.77%) over the fifteen-year period. The prevalence of BMI categories by place of residence is presented in **Figure 3**. In urban areas, the prevalence

1  
2  
3 of underweight went down to 12.21% in 2014 from 21.09% in 1999 and in rural areas; it  
4  
5 dropped to 29.74% in 2014 from 48.18% in 1999. There was a 1.76 and 3.5-fold increase in  
6  
7 overweight, 5.12, and 7.23-fold increase in obesity in the prevalence of overweight and obesity  
8  
9 in urban and rural areas respectively (**Figure 3**).

### 12 *Prevalence of overweight and obesity*

13 **Table S2** shows the overall prevalence of BMI categories by age groups and place of residence.

14  
15 The prevalence of individuals with overweight and obesity increased across the five survey  
16  
17 years, for women residing in both urban and rural areas across all age groups. The prevalence  
18  
19 of underweight and normal weight decreased in both rural and urban areas. Based on the Asian  
20  
21 BMI cutoffs, the overall prevalence of overweight in rural and urban women increased from  
22  
23 19.08% (95% CI: 16.95, 21.42) and 5.02% (95% CI: 4.33, 5.83) in 1999 to 33.74% (95% CI: 32.19,  
24  
25 35.32) and 26.24% (95% CI: 25.17, 27.34) in 2014, respectively. Similarly, the prevalence of  
26  
27 obesity increased from 5.52% (95% CI: 4.32, 7.04) and 1.02% (95% CI: 0.72, 1.44) in 1999 to  
28  
29 19.32% (95% CI: 18.01, 20.69) and 7.37% (95% CI: 6.82, 7.97) in 2014 in urban and rural areas,  
30  
31 respectively. The highest increase of overweight was observed among women age 35-44 years  
32  
33 from 15.79% and 6.10 % in 1999 to 37.62% and 30.09% in 2014 in urban and rural areas,  
34  
35 respectively. The prevalence of obesity increased almost three fold among women aged 25-34  
36  
37 years from 7.47% and 1.37 % in 1999 to 21.23% and 8.28% in 2014 in urban and rural areas,  
38  
39 respectively. The prevalence estimates of BMI for urban and rural women differed when the  
40  
41 international BMI cutoffs were used (**TableS3**). A sharp decline was also observed in  
42  
43 underweight (urban- 29.73% to 12.2%; rural- 48.18% to 21.08%) during 1999 to 2014 applying  
44  
45 the international BMI standard. Across urban and rural and all survey years, the prevalence of  
46  
47  
48  
49  
50  
51  
52  
53  
54  
55  
56  
57  
58  
59  
60

1  
2  
3 overweight and obesity using the Asian-specific guidelines was 2.10 to 2.5 times higher than  
4 prevalence estimates based on the international guidelines (**FigureS1**).

7  
8 *Risk factors of overweight or obesity*

10 The association of overweight and obesity with adjusted for participants' socio-demographic  
11 risk factors for urban and rural women is presented in **Table 2**. Overall, the risk factors of  
12 overweight and obesity differed between urban and rural women. Increasing age was found to  
13 be associated with higher overweight and obesity risk among both rural and urban residents  
14 though the association was stronger among urban residents. The highest overweight (ARR:  
15 3.14, 95% CI: 2.74, 3.59) and obesity (ARR: 6.77, 95% CI: 5.56, 8.24) risk were for the urban  
16 women in the age group 35-44 years compared to the women 15-24 years. The risk of  
17 overweight and obesity were found to be high for urban women with higher educational level,  
18 married, higher social status, and women whose husband had a higher educational level. In  
19 terms of wealth index, there was significant risk variation between urban and rural study  
20 participants. The middle, richer, and richest rural women had of 1.63, 2.55, and 5.85 higher  
21 odds of being overweight compared to the women in the poorest wealth index group. The odds  
22 of being obese was found to be 2.30, 3.94, and 7.88 times higher for middle, richer, and richest  
23 rural women, respectively. Married women in urban areas were found to have a higher 27%  
24 overweight (ARR: 1.27, 95% CI: 1.04, 1.56) and 41% higher obesity (ARR: 1.41, 95% CI: 1.07,  
25 1.86) risk compared to the not married women. Marital status was not significantly associated  
26 with overweight or obesity for rural women's. Watching TV at least once in a week was an  
27 independent risk factor for overweight and obesity among both urban and rural women and  
28 the risk was stronger among urban women. In the adjusted model, women who watched TV at  
29  
30  
31  
32  
33  
34  
35  
36  
37  
38  
39  
40  
41  
42  
43  
44  
45  
46  
47  
48  
49  
50  
51  
52  
53  
54  
55  
56  
57  
58  
59  
60

1  
2  
3 least once a week had 28% (ARR: 1.28, 95% CI: 1.13, 1.45) and 72% (ARR: 1.72, 95% CI: 1.43,  
4  
5 2.07) higher risk of being overweight and obese, respectively as of women who do not watch TV  
6  
7 at least once in a week.  
8  
9

10 Women's employment status was only associated with overweight or obesity for urban  
11  
12 residents. Working urban women had a lower probability of being overweight (ARR: 0.79, 95%  
13  
14 CI: 0.71, 0.89) or obese (ARR: 0.54, 95% CI: 0.46, 0.64) compared to those who were not  
15  
16 engaged in any type of work. Women of rural areas with more than five or more household  
17  
18 members had a lower probability of being overweight (ARR: 0.71, 95% CI: 0.60, 0.84) and obese  
19  
20 (ARR: 0.61, 95% CI: 0.45, 0.81) compared to women who had only one or two household  
21  
22 members. As compared to the 2004 survey, the risk of being overweight significantly increased  
23  
24 with each subsequent survey years in urban and rural areas. For the increase of one survey  
25  
26 period, the risk of overweight and obesity was much stronger in rural areas compared to urban  
27  
28 areas after adjusting for all predictors. For example, in the most recent 2014 survey the odds of  
29  
30 4.47 (95% CI: 3.59, 5.57) being obese among rural women was as of 2004 survey whereas, in  
31  
32 2014 urban women had odds of 3.23 (95% CI: 2.71, 3.86) being obese in 2014 compare to the  
33  
34 2004 survey.  
35  
36  
37  
38  
39  
40  
41

## 42 **Discussion**

43  
44 We identified an increasing trend of overweight and obesity among Bangladeshi reproductive-  
45  
46 age women with a five-fold increase of obesity between 1999 and 2014. This trend suggests  
47  
48 that Bangladesh may continue to experience obesity epidemic in future highlighting the risk of  
49  
50 adverse health outcome associated with overweight and obesity. Overweight and obesity put  
51  
52 women at elevated risk for a myriad of adverse health outcomes, including cardiovascular  
53  
54  
55  
56  
57  
58  
59  
60

1  
2  
3 disease, diabetes, kidney disease, and obesity-related cancers [3,4,22](#). These women are also more  
4  
5 likely to develop pregnancy complications, such as gestational diabetes, hypertensive disorders  
6  
7 of pregnancy, cesarean section delivery and adverse fetal outcome [14,16](#). Bangladesh though  
8  
9 made substantial progress in reducing death from pregnancy-related complications in the last  
10  
11 couple of decades, it still remains very high and the increasing trend of obesity among  
12  
13 reproductive age women may create new challenges [23,24](#).  
14  
15  
16  
17  
18  
19

20 Our findings of increasing prevalence of overweight and obesity over the years is consistent  
21  
22 with the findings from neighboring countries as well as current trends in most developing  
23  
24 countries, and across the globe [2](#). This trend could be explained by substantial changes in  
25  
26 lifestyle including change in eating habits with more energy-dense food intake and sedentary  
27  
28 lifestyle with reduced physical activity patterns [25](#). These changes have been observed in  
29  
30 Bangladesh with rapid economic growth, urbanization, modernization, and globalization of the  
31  
32 food market [26](#).  
33  
34  
35  
36  
37  
38  
39

40 We found the highest increase in the prevalence of overweight and obesity among women  
41  
42 aged 35-44 years. Studies from other low-income countries showed that older women (aged  
43  
44 45-49) are at greatest risk of overweight and obesity [27](#). Because we did not include women  
45  
46 aged more than 49 years of age in this analysis, the actual number of obese women might be  
47  
48 much higher in Bangladesh. Our study also showed that the increasing rate of overweight and  
49  
50 obesity was more marked in rural areas than urban areas whereas the rate of reduction of  
51  
52 undernutrition was much higher in urban areas. This disparity may be the result of multiple  
53  
54  
55  
56  
57  
58  
59  
60

1  
2  
3 factors. Reduction in poverty leads to improvement in the nutritional status<sup>28</sup>. Haddad *et al.*  
4  
5 have shown that increase in income at the household and national levels can significantly  
6  
7 improve the nutritional status<sup>29</sup>. Bangladesh has made progress in increasing per-capita  
8  
9 income, particularly since the second half of the 1990s when growth in per-capita income  
10  
11 accelerated to 3.6% per year<sup>30</sup>. However, this income growth has primarily occurred among the  
12  
13 rich and decreased among the poor, widening the gap between the richest and the poorest<sup>31</sup>.  
14  
15 The income Gini coefficient (measures income inequality and a greater value represents greater  
16  
17 inequality) shows an increase from 0.432 in 1995 to 0.451 in 2000 and to 0.458 in 2010 mostly  
18  
19 because of increasing inequality between urban and rural areas<sup>31</sup>. Therefore, this income  
20  
21 inequality between the rich and the poor and between urban and rural populations, and the  
22  
23 decline in food consumption could, in part, explain the slow reduction of number of  
24  
25 overweight women in urban areas. Our data showed that over last 15 years' the number of  
26  
27 educated and employed women increased significantly in Bangladesh, however, this increase  
28  
29 primarily occurred in urban areas. Because educational status and employment are both  
30  
31 negatively associated with obesity, this might explain the variation in overweight and obesity  
32  
33 between urban and rural women<sup>32</sup>.  
34  
35  
36  
37  
38  
39  
40  
41

42 We determined that educational status including the husband's educational status, marital  
43  
44 status, wealth index, self-reported hours of television watched, and employment status were  
45  
46 significantly associated with overweight and obesity. Our study showed that compared to  
47  
48 women who have no education, women with higher educational status were at increased risk  
49  
50 of overweight and obesity. Highly educated women are more likely to have a sedentary job  
51  
52 requiring less physical activity and hence increases the chance of weight gain. Studies from  
53  
54  
55  
56  
57  
58  
59  
60



1  
2  
3 other developing countries have also shown a positive association between level of education  
4 and obesity, however, a negative association between the two variables has also been observed  
5  
6 primarily in developed countries <sup>32</sup>. Our findings that wealthier women are more to be  
7  
8 overweight or obese are consistent with studies done in other low and middle-income  
9  
10 countries <sup>33</sup>. This is likely due to increasing wealth in lower income countries results in greater  
11  
12 access to food, an escape from physical labor and therefore a higher risk of obesity.  
13  
14  
15

16  
17 We found that television watching was an independent predictor of overweight and obesity.  
18  
19 Television viewing has been used as a proxy measure for sitting time and studies that follow  
20  
21 participants over long periods of time have consistently found that people who spend more  
22  
23 time watching television are more likely to gain weight <sup>34</sup>. Unemployed Bangladeshi women  
24  
25 spend a significant amount of time watching television as a leisure activity and with the  
26  
27 economic growth increasing access to television suggest that viewing television may further  
28  
29 increase which may further contribute obesity of this group.  
30  
31  
32

33  
34 Because geographical, ethnic, and cultural variation have large impacts on trends of overweight  
35  
36 and obesity, we used Asian BMI standard instead of international guidelines. We found that the  
37  
38 prevalence estimate of overweight and obesity using Asian BMI category across all survey years  
39  
40 were 2.10 to 2.50 times higher compared to estimates based on the international guidelines.  
41  
42  
43

44  
45 Evidence have shown that Asian populations are at an increased risk of cardio metabolic  
46  
47 disorders at lower BMI levels than other ethnic groups, which has been attributed to a  
48  
49 considerably higher body fat percentage <sup>35</sup>. For that reason, in 2004 the WHO recommended  
50  
51 lowering the BMI cut-offs for Asian adults, for overweight from 25 to 23 kg/m<sup>2</sup> and for obesity  
52  
53 from 30 to 27.5 kg/m<sup>2</sup> in anticipation of the increased health risks <sup>20</sup>. Therefore, previous  
54  
55  
56  
57  
58  
59  
60

1  
2  
3 reports that focuses international BMI classification in estimating overweight and obesity  
4  
5 prevalence may have undermined actual risk.  
6  
7

8 Our analysis has several limitations. We used secondary cross-sectional data limiting our ability  
9  
10 to identify a causal relationship. Moreover, the dataset lack some key variables including food  
11  
12 habit, physical activity, and smoking. Evidence showed that these factors strongly influence  
13  
14 weight gain and may interact with other predictors of obesity such as wealth and education.  
15  
16 However, the study included representative sample across Bangladesh including both urban  
17  
18 and rural women and used Asian BMI category for the analysis strengthening our evidence  
19  
20 base.  
21  
22  
23

## 24 **Conclusion**

25  
26  
27 Overweight and obesity continue to increase among Bangladeshi reproductive-age women  
28  
29 between 1999 and 2014. Several sociodemographic factors including age, education, wealth  
30  
31 index, marital status, television watching and employment status were associated with the  
32  
33 increasing trend of overweight and obesity. The prevalence and risk factors varied between  
34  
35 urban and rural women. Further research should focus on identifying other behavioral risk  
36  
37 factors associated with overweight and obesity and identify feasible interventions to include  
38  
39 those most at risk including older, higher educated and wealthy women.  
40  
41  
42  
43  
44  
45  
46  
47  
48  
49  
50  
51  
52  
53  
54  
55  
56  
57  
58  
59  
60

## References

1. Organization WH. Obesity and overweight. 2016; <http://www.who.int/mediacentre/factsheets/fs311/en/>. Accessed March 24, 2017.
2. Ng M, Fleming T, Robinson M, et al. Global, regional, and national prevalence of overweight and obesity in children and adults during 1980–2013: a systematic analysis for the Global Burden of Disease Study 2013. *The Lancet*. 2014;384(9945):766-781.
3. Chowdhury MAB, Uddin MJ, Haque MR, Ibrahimou B. Hypertension among adults in Bangladesh: evidence from a national cross-sectional survey. *BMC Cardiovascular Disorders*. 2016;16(1):22.
4. Chowdhury MAB, Uddin MJ, Khan HM, Haque MR. Type 2 diabetes and its correlates among adults in Bangladesh: a population based study. *BMC Public Health*. 2015;15:1070.
5. Organization WH. The Asia-Pacific perspective: redefining obesity and its treatment. Sydney: Health Communications Australia; 2000.
6. Swinburn BA, Sacks G, Hall KD, et al. The global obesity pandemic: shaped by global drivers and local environments. *The Lancet*. 2011;378(9793):804-814.
7. Cohen E, Boetsch G, Palstra F, Pasquet P. Social valorisation of stoutness as a determinant of obesity in the context of nutritional transition in Cameroon: The Bamiléké case. *Social Science & Medicine*. 2013;96:24-32.
8. Ziraba AK, Fotso JC, Ochako R. Overweight and obesity in urban Africa: A problem of the rich or the poor? *BMC public health*. 2009;9(1):465.
9. Snyder JD, Merson MH. The magnitude of the global problem of acute diarrhoeal disease: a review of active surveillance data. *Bulletin of the world Health Organization*. 1982;60(4):605.
10. Müller O, Krawinkel M. Malnutrition and health in developing countries. *Canadian Medical Association Journal*. 2005;173(3):279-286.
11. Sarma H, Saquib N, Hasan MM, et al. Determinants of overweight or obesity among ever-married adult women in Bangladesh. *BMC Obes*. 2016;3:13.
12. Akter J, Shahjahan M, Hossain S, et al. Determinants of overweight and obesity among Bangladeshi diabetic women of reproductive age. *BMC Res Notes*. 2014;7:513.
13. Khan M, Krämer A. Factors associated with being underweight, overweight and obese among ever-married non-pregnant urban women in Bangladesh. *Singapore medical journal*. 2009;50(8):804.
14. Cedergren MI. Maternal morbid obesity and the risk of adverse pregnancy outcome. *Obstetrics & Gynecology*. 2004;103(2):219-224.
15. Gunderson EP. Childbearing and obesity in women: weight before, during, and after pregnancy. *Obstetrics and gynecology clinics of North America*. 2009;36(2):317-332.
16. Baeten JM, Bukusi EA, Lambe M. Pregnancy complications and outcomes among overweight and obese nulliparous women. *American journal of public health*. 2001;91(3):436.
17. Galtier-Dereure F, Boegner C, Bringer J. Obesity and pregnancy: complications and cost. *The American journal of clinical nutrition*. 2000;71(5):1242s-1248s.
18. (NIPORT) NIOPRaT, Associates Ma, International I. *Bangladesh Demographic and Health Survey 2011*. Dhaka2013.
19. (BBS) BBoS. *Bangladesh Population and Housing Census 2011*. Dhaka: Government of the People's Republic of Bangladesh;2012.
20. Barba C, Cavalli-Sforza T, Cutter J, Darnton-Hill I. Appropriate body-mass index for Asian populations and its implications for policy and intervention strategies. *The lancet*. 2004;363(9403):157.
21. Clinical Guidelines on the Identification, Evaluation, and Treatment of Overweight and Obesity in Adults--The Evidence Report. National Institutes of Health. *Obes Res*. 1998;6 Suppl 2:51s-209s.

22. Flegal KM, Graubard BI, Williamson DF, Gail MH. Cause-specific excess deaths associated with underweight, overweight, and obesity. *Jama*. 2007;298(17):2028-2037.
23. Koblinsky M, Anwar I, Mridha MK, Chowdhury ME, Botlero R. Reducing maternal mortality and improving maternal health: Bangladesh and MDG 5. *Journal of Health, Population and Nutrition*. 2008;280-294.
24. Chowdhury AMR, Bhuiya A, Chowdhury ME, Rasheed S, Hussain Z, Chen LC. The Bangladesh paradox: exceptional health achievement despite economic poverty. *The Lancet*. 2013;382(9906):1734-1745.
25. Malik VS, Willett WC, Hu FB. Global obesity: trends, risk factors and policy implications. *Nature Reviews Endocrinology*. 2013;9(1):13-27.
26. Vlismas K, Stavrinou V, Panagiotakos DB. Socio-economic status, dietary habits and health-related outcomes in various parts of the world: a review. *Central European journal of public health*. 2009;17(2):55.
27. Subramanian SV, Perkins JM, Khan KT. Do burdens of underweight and overweight coexist among lower socioeconomic groups in India? *The American journal of clinical nutrition*. 2009;90(2):369-376.
28. Subramanian S, Kawachi I, Smith GD. Income inequality and the double burden of under- and overnutrition in India. *Journal of Epidemiology and Community Health*. 2007;61(9):802-809.
29. Haddad L, Alderman H, Appleton S, Song L, Yohannes Y. Reducing child malnutrition: How far does income growth take us? *The World Bank Economic Review*. 2003;17(1):107-131.
30. Planning Commission GoB. Unlocking the potential: national strategy for accelerated poverty reduction. In: Commission P, ed. Dhaka 2005:320.
31. BBoS. *Report of the household income and expenditure survey*. Dhaka: Bangladesh Bureau of Statistics . ;2005.
32. Martín AR, Nieto JMM, Ruiz JPN, Jiménez LE. Overweight and obesity: the role of education, employment and income in Spanish adults. *Appetite*. 2008;51(2):266-272.
33. Dinsa G, Goryakin Y, Fumagalli E, Suhrcke M. Obesity and socioeconomic status in developing countries: a systematic review. *Obesity reviews*. 2012;13(11):1067-1079.
34. Al-Ghamdi SH. The association between watching television and obesity in children of school-age in Saudi Arabia. *Journal of Family and Community Medicine*. 2013;20(2):83.
35. Deurenberg-Yap M, Chew S, Lin V, Tan B, Van Staveren W, Deurenberg P. Relationships between indices of obesity and its co-morbidities in multi-ethnic Singapore. *International journal of obesity*. 2001;25(10):1554.

## Tables

**Table 1.** Socio-demographic characteristics of the study participants by survey, BDHS 1999-2014

| Variables                 | 1999         | 2004         | 2007         | 2011         | 2014          | p-value |
|---------------------------|--------------|--------------|--------------|--------------|---------------|---------|
| Age, mean(SD)             | 25.88 (6.63) | 30.56 (9.36) | 30.94 (9.3)  | 31.23 (9.22) | 31.37 (9.12)  | <0.001  |
| Age group, n (%)          |              |              |              |              |               | <0.001  |
| 15-24                     | 2148 (47.05) | 3303 (31.82) | 2996 (30.29) | 4557 (28.72) | 4433 (27.04)  |         |
| 25-34                     | 2007 (41.52) | 3533 (33.77) | 3344 (33.13) | 5603 (34.19) | 5969 (36.44)  |         |
| 35-44                     | 486 (10.61)  | 2598 (24.39) | 2747 (26.69) | 4321 (26.2)  | 4435 (26.05)  |         |
| 45+                       | 38 (0.81)    | 1055 (10.02) | 1040 (9.89)  | 1792 (10.89) | 1787 (10.47)  |         |
| Educational level, n (%)  |              |              |              |              |               | <0.001  |
| No education              | 2002 (44.62) | 4158 (42.44) | 3326 (34.85) | 4386 (28.59) | 4039 (25.68)  |         |
| Primary                   | 1364 (29.14) | 3070 (29.07) | 3014 (29.67) | 4857 (30.04) | 4875 (29.24)  |         |
| Secondary                 | 1072 (22.05) | 2629 (23.52) | 2983 (29.52) | 5731 (34.3)  | 6153 (36.76)  |         |
| Higher                    | 241 (4.19)   | 632 (4.97)   | 801 (5.96)   | 1299 (7.07)  | 1557 (8.32)   |         |
| Place of residence, n (%) |              |              |              |              |               | <0.001  |
| Urban                     | 1275 (17.76) | 3593 (22.58) | 3858 (22.81) | 5709 (26.1)  | 5764 (28.41)  |         |
| Rural                     | 3404 (82.24) | 6896 (77.42) | 6269 (77.19) | 11000 (73.9) | 11000 (71.59) |         |
| Geographic region, n (%)  |              |              |              |              |               | <0.001  |
| Barisal                   | 434 (6.48)   | 1252 (6.33)  | 1327 (6.01)  | 1819 (5.45)  | 1982 (6.19)   |         |
| Chittagong                | 937 (20.08)  | 1869 (17.56) | 1775 (18.23) | 2616 (18)    | 2639 (18.29)  |         |
| Dhaka                     | 1123 (31.05) | 2376 (31.27) | 2178 (31.5)  | 2795 (32.18) | 2893 (34.96)  |         |
| Khulna                    | 760 (11.42)  | 1583 (12.32) | 1589 (12.77) | 2488 (12.4)  | 2460 (10.51)  |         |
| Rajshahi                  | 889 (24.48)  | 2374 (26.35) | 1933 (25.31) | 4703 (26.73) | 4769 (23.56)  |         |
| Sylhet                    | 536 (6.49)   | 1035 (6.17)  | 1325 (6.18)  | 1852 (5.25)  | 1881 (6.49)   |         |
| Marital status, n (%)     |              |              |              |              |               | <0.001  |
| Not married               | 130 (2.71)   | 859 (7.93)   | 822 (7.7)    | 1091 (6.6)   | 1014 (5.95)   |         |
| Married                   | 4549 (97.29) | 9630 (92.07) | 9305 (92.3)  | 15000 (93.4) | 16000 (94.05) |         |
| <b>Urban</b>              |              |              |              |              |               |         |
| BMI, Kg/m <sup>2</sup>    |              |              |              |              |               | <0.001  |
| Mean (SD)                 | 20.78 (4.51) | 21.52 (5.06) | 22.24 (5.44) | 23 (4.87)    | 23.7 (5.06)   |         |
| BMI categories, n (%)     |              |              |              |              |               | <0.001  |
| Underweight               | 385 (29.74)  | 903 (24.84)  | 787 (19.54)  | 879 (13.46)  | 738 (12.21)   |         |
| Normal weight             | 585 (45.65)  | 1573 (44.47) | 1629 (41.73) | 2298 (41.4)  | 1996 (34.73)  |         |
| Overweight                | 237 (19.09)  | 801 (21.87)  | 1010 (26.88) | 1729 (30.62) | 1971 (33.74)  |         |
| Obese                     | 68 (5.53)    | 316 (8.81)   | 432 (11.85)  | 803 (14.52)  | 1059 (19.32)  |         |
| Overweight or obese       | 305 (24.61)  | 1117 (30.68) | 1442 (38.73) | 2532 (45.14) | 3030 (53.06)  |         |
| <b>Rural</b>              |              |              |              |              |               |         |
| BMI, Kg/m <sup>2</sup>    |              |              |              |              |               | <0.001  |
| Mean (SD)                 | 18.97 (2.42) | 19.76 (2.72) | 20.18 (2.83) | 20.82 (3.29) | 21.71 (3.62)  |         |
| BMI categories, n (%)     |              |              |              |              |               | <0.001  |
| Underweight               | 1636 (48.19) | 2581 (36.9)  | 2107 (32.45) | 2940 (27.83) | 2353 (21.09)  |         |
| Normal weight             | 1560 (45.76) | 3422 (49.82) | 3135 (50.72) | 5138 (48.59) | 4926 (45.3)   |         |

**Table 1.** Socio-demographic characteristics of the study participants by survey, BDHS 1999-2014

| Variables                         | 1999         | 2004         | 2007         | 2011          | 2014          | p-value |
|-----------------------------------|--------------|--------------|--------------|---------------|---------------|---------|
| Overweight                        | 174 (5.03)   | 762 (11.36)  | 851 (13.88)  | 1997 (18.97)  | 2780 (26.24)  |         |
| Obese                             | 34 (1.02)    | 131 (1.92)   | 176 (2.96)   | 489 (4.62)    | 801 (7.38)    |         |
| Overweight or obese               | 208 (6.05)   | 893 (13.28)  | 1027 (16.83) | 2486 (23.58)  | 3581 (33.62)  |         |
| Wealth index, n (%)               |              |              |              |               |               | 0.1665  |
| Poorest                           | NA           | 1865 (19.85) | 1636 (19.19) | 2811 (18.29)  | 2999 (18.55)  |         |
| Poorer                            | NA           | 1880 (19.92) | 1822 (19.35) | 2995 (19.47)  | 3102 (18.95)  |         |
| Middle                            | NA           | 1960 (19.77) | 1910 (19.72) | 3129 (20.07)  | 3382 (20.04)  |         |
| Richer                            | NA           | 2098 (20.38) | 2043 (20.85) | 3472 (20.83)  | 3534 (21.21)  |         |
| Richest                           | NA           | 2686 (20.08) | 2716 (20.88) | 3866 (21.34)  | 3607 (21.24)  |         |
| Watch TV (once a week), n (%)     |              |              |              |               |               | <0.001  |
| No                                | 2946 (66.99) | 5459 (54.5)  | 5138 (53.2)  | 8149 (51.61)  | 7997 (48.83)  |         |
| Yes                               | 1732 (33.01) | 5027 (45.5)  | 4985 (46.8)  | 8120 (48.39)  | 8626 (51.17)  |         |
| Currently working, n (%)          |              |              |              |               |               |         |
| No                                | 3839 (81.19) | 8098 (76.85) | 7068 (67.12) | 14000 (86.62) | 11000 (65.85) |         |
| Yes                               | 840 (18.81)  | 2390 (23.15) | 3055 (32.88) | 2216 (13.38)  | 5398 (34.15)  |         |
| Number of living children, n (%)  |              |              |              |               |               | <0.001  |
| 0                                 | 67 (1.46)    | 1017 (9.39)  | 930 (8.78)   | 1371 (8.53)   | 1385 (7.96)   |         |
| 1-2                               | 2669 (56.66) | 4590 (43.15) | 4769 (47.11) | 8236 (50.09)  | 8857 (53.48)  |         |
| 3-4                               | 1358 (29.25) | 3312 (32.45) | 3111 (31.61) | 5102 (31.64)  | 5013 (30.45)  |         |
| >5                                | 585 (12.63)  | 1570 (15.01) | 1317 (12.5)  | 1564 (9.74)   | 1369 (8.11)   |         |
| Number of household member, n (%) |              |              |              |               |               | <0.001  |
| 1-2                               | 46 (1.03)    | 382 (3.71)   | 405 (4.11)   | 694 (4.46)    | 834 (5.27)    |         |
| 3-4                               | 1208 (26.22) | 3079 (30.31) | 3171 (32.63) | 5633 (34.65)  | 6224 (37.36)  |         |
| >5                                | 3425 (72.75) | 7028 (65.99) | 6551 (63.25) | 9946 (60.89)  | 9566 (57.36)  |         |
| Contraceptive use, n (%)          |              |              |              |               |               | <0.001  |
| Not using                         | 2060 (44.71) | 4422 (41.76) | 4555 (44.02) | 6260 (38.76)  | 6227 (37.19)  |         |
| Pills                             | 1352 (2.904) | 2641 (2.606) | 2734 (2.835) | 4385 (2.725)  | 4476 (2.717)  |         |
| Other                             | 1267 (26.25) | 3426 (32.18) | 2838 (27.63) | 5628 (33.99)  | 5921 (35.64)  |         |
| Husband education, n (%)          |              |              |              |               |               | <0.001  |
| No education                      | 1851 (42.48) | 3818 (39.16) | 3342 (35.92) | 4833 (31.73)  | 4764 (29.5)   |         |
| Primary                           | 1102 (24.24) | 2629 (25.34) | 2610 (25.78) | 4362 (26.89)  | 4503 (27.1)   |         |
| Secondary                         | 1098 (23.05) | 2691 (24.43) | 2660 (25.94) | 4680 (27.93)  | 4884 (29.71)  |         |
| Higher                            | 549 (10.23)  | 1342 (11.07) | 1501 (12.37) | 2390 (13.46)  | 2471 (13.69)  |         |

**Table 2.** Association of overweight and obesity with socio demographic characteristics by place of residence, BDHS 1999-2014

|                            | Urban                  |         |                   |         | Rural                  |         |                    |         |
|----------------------------|------------------------|---------|-------------------|---------|------------------------|---------|--------------------|---------|
|                            | Overweight vs. healthy |         | Obese vs. healthy |         | Overweight vs. healthy |         | Obese vs. healthy  |         |
| Age group                  | RR (95% CI)            | p-value | RR (95% CI)       | p-value | RR (95% CI)            | p-value | RR (95% CI)        | p-value |
| 15-24                      | Ref                    |         | Ref               |         | Ref                    |         | Ref                |         |
| 25-34                      | 2.39 (2.11, 2.7)       | 0.000   | 4.04 (3.34, 4.87) | 0.00    | 2.09 (1.9, 2.31)       | 0.000   | 3.23 (2.67, 3.91)  | 0.000   |
| 35-44                      | 3.14 (2.74, 3.59)      | 0.000   | 6.77 (5.56, 8.24) | 0.00    | 2.45 (2.2, 2.73)       | 0.000   | 4.06 (3.3, 4.99)   | 0.000   |
| 45+                        | 2.59 (2.15, 3.12)      | 0.000   | 6.22 (4.88, 7.92) | 0.00    | 2.47 (2.14, 2.86)      | 0.000   | 3.69 (2.87, 4.74)  | 0.000   |
| Education level            |                        |         |                   |         |                        |         |                    |         |
| No education               | Ref                    |         | Ref               |         | Ref                    |         | Ref                |         |
| Primary                    | 1.22 (1.06, 1.41)      | 0.006   | 1.25 (1.01, 1.54) | 0.03    | 1.11 (1.01, 1.23)      | 0.023   | 1.22 (1.02, 1.46)  | 0.026   |
| Secondary                  | 1.41 (1.2, 1.65)       | 0.000   | 1.61 (1.29, 2.02) | 0.00    | 1.15 (1.03, 1.3)       | 0.014   | 1.27 (1.04, 1.55)  | 0.019   |
| Higher                     | 1.61 (1.3, 1.99)       | 0.000   | 1.42 (1.07, 1.9)  | 0.02    | 1.12 (0.92, 1.36)      | 0.238   | 0.92 (0.67, 1.27)  | 0.649   |
| Marital status             |                        |         |                   |         |                        |         |                    |         |
| Not married                | Ref                    |         |                   |         |                        |         |                    |         |
| Married                    | 1.27 (1.04, 1.56)      | 0.018   | 1.41 (1.07, 1.86) | 0.01    | NA                     | NA      | NA                 | NA      |
| Wealth index               |                        |         |                   |         |                        |         |                    |         |
| Poorest                    | Ref                    |         | Ref               |         | Ref                    |         | Ref                |         |
| Poorer                     | 1.15 (0.87, 1.52)      | 0.317   | 0.99 (0.58, 1.7)  | 0.99    | 1.32 (1.17, 1.49)      | 0.000   | 1.45 (1.11, 1.9)   | 0.006   |
| Middle                     | 1.65 (1.29, 2.11)      | 0.000   | 1.63 (1.02, 2.61) | 0.04    | 1.65 (1.46, 1.87)      | 0.000   | 2.3 (1.78, 2.97)   | 0.000   |
| Richer                     | 1.88 (1.49, 2.37)      | 0.000   | 2.55 (1.64, 3.96) | 0.00    | 2.46 (2.16, 2.8)       | 0.000   | 3.94 (3.05, 5.1)   | 0.000   |
| Richest                    | 2.83 (2.24, 3.57)      | 0.000   | 5.58 (3.6, 8.63)  | 0.00    | 3.38 (2.9, 3.94)       | 0.000   | 7.88 (5.93, 10.46) | 0.000   |
| Watch TV (once a week)     |                        |         |                   |         |                        |         |                    |         |
| No                         | Ref                    |         | Ref               |         | Ref                    |         | Ref                |         |
| Yes                        | 1.28 (1.13, 1.45)      | 0.000   | 1.72 (1.43, 2.07) | 0.00    | 1.25 (1.15, 1.35)      | 0.000   | 1.4 (1.22, 1.62)   | 0.000   |
| Currently working          |                        |         |                   |         |                        |         |                    |         |
| No                         | Ref                    |         | Ref               |         |                        |         |                    |         |
| Yes                        | 0.79 (0.71, 0.89)      | 0.000   | 0.54 (0.46, 0.64) | 0.00    | NA                     | NA      | NA                 | NA      |
| Number of household member |                        |         |                   |         |                        |         |                    |         |
| 1-2                        |                        |         |                   |         | Ref                    |         | Ref                |         |
| 3-4                        | NA                     | NA      | NA                | NA      | 0.86 (0.72, 1.02)      | 0.093   | 0.86 (0.64, 1.16)  | 0.353   |
| >5                         | NA                     | NA      | NA                | NA      | 0.71 (0.6, 0.84)       | 0.000   | 0.61 (0.45, 0.81)  | 0.001   |
| Contraceptive use          |                        |         |                   |         |                        |         |                    |         |
| Not using                  | Ref                    |         |                   |         | Ref                    |         | Ref                |         |
| Pills                      | 0.96 (0.85, 1.09)      | 0.605   | 0.79 (0.67, 0.94) | 0.01    | 1.06 (0.98, 1.16)      | 0.130   | 0.83 (0.7, 0.97)   | 0.022   |
| Other                      | 1.07 (0.95, 1.2)       | 0.237   | 1.04 (0.9, 1.2)   | 0.55    | 1.08 (0.99, 1.18)      | 0.053   | 0.94 (0.82, 1.09)  | 0.459   |
| Husband education          |                        |         |                   |         |                        |         |                    |         |
| No education               | Ref                    |         | Ref               |         | Ref                    |         | Ref                |         |
| Primary                    | 1.11 (0.95, 1.29)      | 0.164   | 1.12 (0.89, 1.4)  | 0.32    | 1.07 (0.97, 1.18)      | 0.132   | 1.22 (1.01, 1.47)  | 0.037   |
| Secondary                  | 1.18 (1.01, 1.37)      | 0.031   | 1.32 (1.05, 1.65) | 0.02    | 1.2 (1.08, 1.34)       | 0.001   | 1.51 (1.25, 1.82)  | 0.000   |
| Higher                     | 1.55 (1.28, 1.88)      | 0.000   | 1.94 (1.49, 2.52) | 0.00    | 1.46 (1.25, 1.69)      | 0.000   | 1.98 (1.55, 2.53)  | 0.000   |
| Survey year                |                        |         |                   |         |                        |         |                    |         |
| 2004                       | Ref                    |         | Ref               |         | Ref                    |         | Ref                |         |
| 2007                       | 1.23 (1.07, 1.42)      | 0.003   | 1.35 (1.11, 1.64) | 0.00    | 1.19 (1.06, 1.35)      | 0.004   | 1.49 (1.15, 1.93)  | 0.002   |
| 2011                       | 1.43 (1.26, 1.63)      | 0.000   | 1.68 (1.4, 2)     | 0.00    | 1.71 (1.54, 1.9)       | 0.000   | 2.5 (2, 3.13)      | 0.000   |
| 2014                       | 2.07 (1.81, 2.37)      | 0.000   | 3.23 (2.71, 3.86) | 0.00    | 2.6 (2.33, 2.89)       | 0.000   | 4.47 (3.59, 5.57)  | 0.000   |

## Figures

**Figure 1.** Kernel density plot of the distribution of BMI for reproductive women in 1999, 2004, 2007, 2011, and 2014.

### (a) Urban

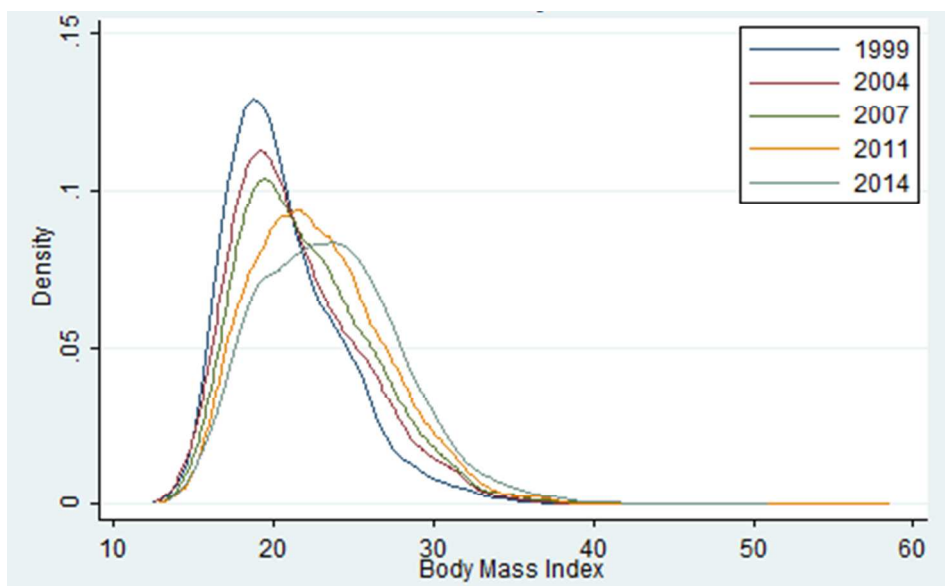

### (b) Rural

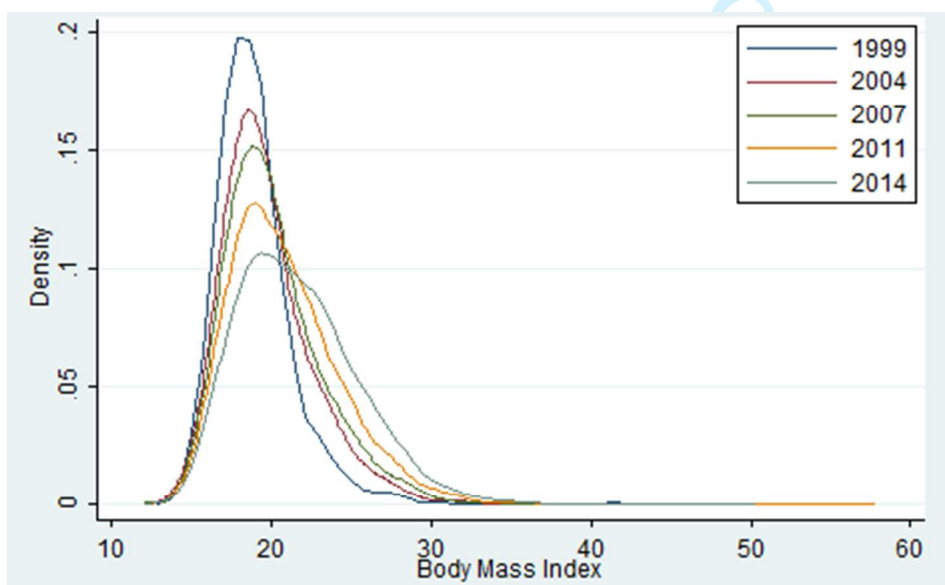



1  
2  
3  
4  
5  
6  
7  
8  
9  
10  
11  
12  
13  
14  
15  
16  
17  
18  
19  
20  
21  
22  
23  
24  
25  
26  
27  
28  
29  
30  
31  
32  
33  
34  
35  
36  
37  
38  
39  
40  
41  
42  
43  
44  
45  
46  
47  
48  
49  
50  
51  
52  
53  
54  
55  
56  
57  
58  
59  
60

**Figure 2.** Prevalence of overweight and obesity by survey year, BDHS 1999-2014.

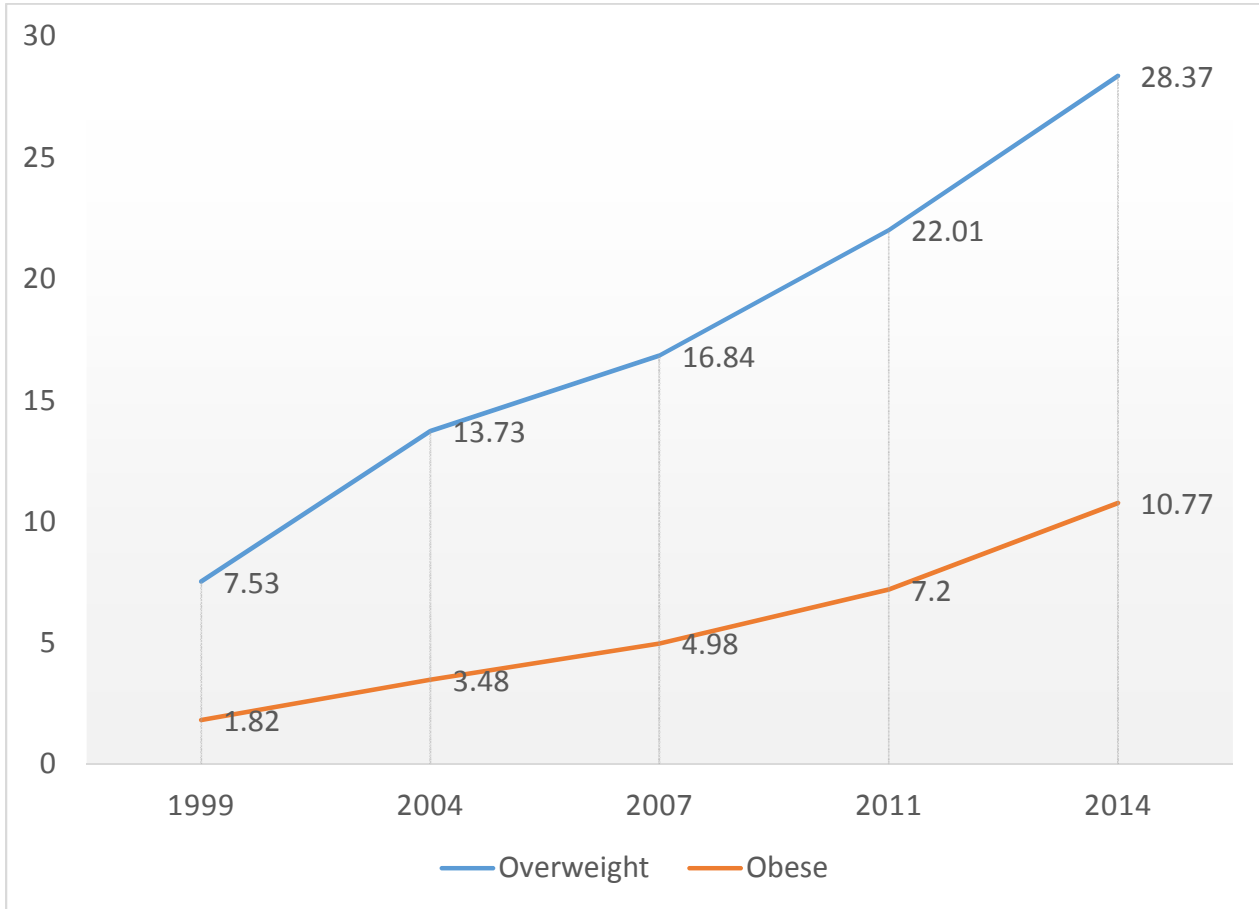

Only

**Figure 3.** Prevalence of underweight, normal, overweight, and obesity by year and place of residence BDHS 1999-2014

**(a) Urban**

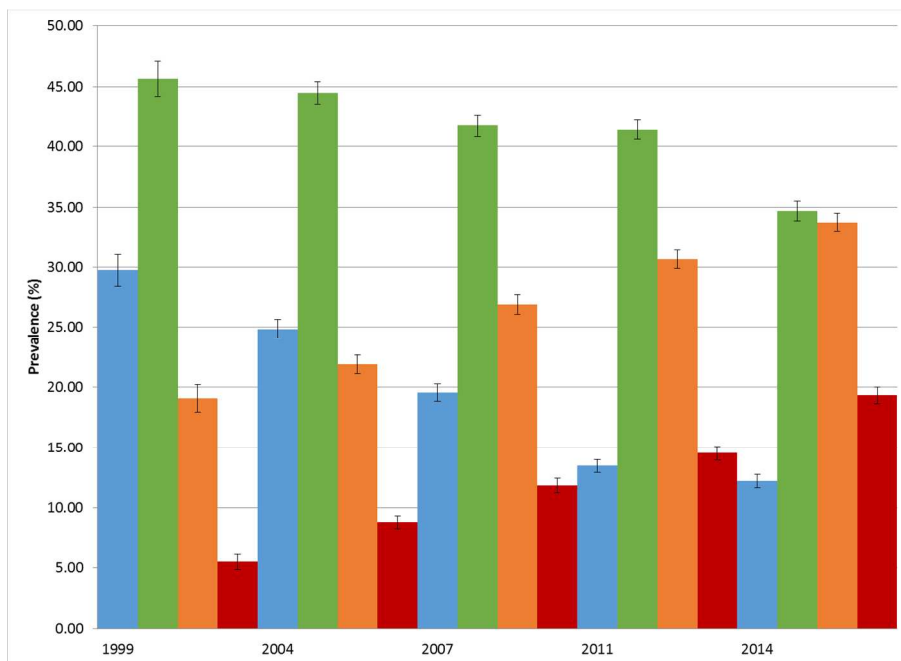

**(b) Rural**

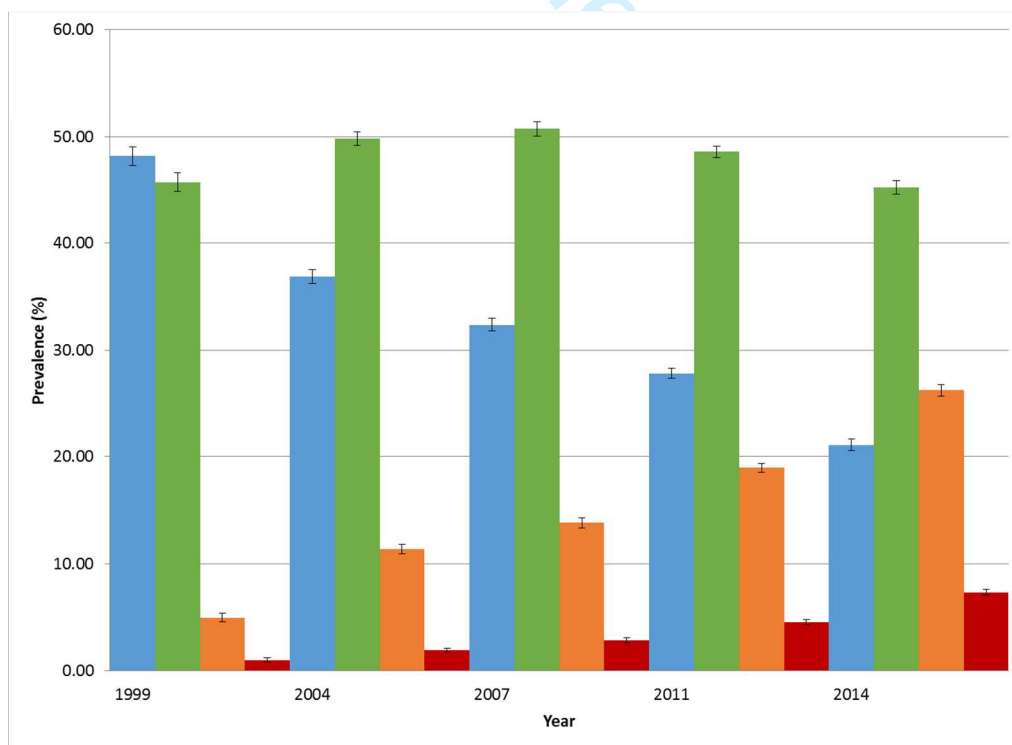

### List of Abbreviations

|      |                                          |
|------|------------------------------------------|
| ARR  | Adjusted risk ratio                      |
| BMI  | Body mass index                          |
| CI   | Confidence interval                      |
| CVD  | Cardiovascular diseases                  |
| WHO  | World Health Organization                |
| BDHS | Bangladesh Demographic and Health Survey |

### Ethical approval and consent

All BDHS surveys received ethical approval from ICF Macro Institutional Review Board, Maryland, USA and National Research Ethics Committee of Bangladesh Medical Research Council (BMRC), Dhaka, Bangladesh. Informed consent was obtained from each participant of the survey before enrolling in the survey by using the Introduction and Consent form of the survey. It was also explained that the information will be kept strictly confidential and will not be shared with anyone except members of the survey team.

**Consent to publish:** Not Applicable

### Availability of data

The datasets used for the current study are publicly available from <http://dhsprogram.com/data/available-datasets.cfm>.

**Funding:** None

**Acknowledgement:** We gratefully acknowledge DHS for allowing us to use the data.

**Disclosure/ Conflict of interest:** None

**Author contribution:** **MABC** conceptualized of the study and designed the analytical approach, performed the data analyses and interpreted the findings, and led the writing of the article. **MMA** were involved in the literature search and drafting the manuscript. **ZH** Helped conceptualize the study literature, variable selection, editing and drafting the manuscript. Revised the manuscript critically for important intellectual content, and final approval of the version to be submitted. All authors helped write the manuscript. All authors read and approved the final manuscript.

## Supplements

**Table S1.** Summary characteristics of the sample by survey year, BDHS 1999-2014

| Variable                        | 1999-00 | 2004  | 2007  | 2011  | 2014  |
|---------------------------------|---------|-------|-------|-------|-------|
| Initial sample of the survey, n | 10544   | 11440 | 10996 | 17842 | 17863 |
| BMI available, n                | 5055    | 11176 | 10836 | 17309 | 17683 |
| Pregnant women, n               | 376     | 678   | 709   | 1036  | 1059  |
| Final working sample, n         | 4679    | 10489 | 10127 | 16273 | 16624 |
| Response rate, %                | 96.9    | 98.6  | 98.4  | 97.9  | 97.9  |

**Table S2.** Prevalence of BMI categories of reproductive women by age and place of residence in Bangladesh, BDHS 1999 - 2014

|               | Age groups | Urban                |                      |                      |                      |                      | Rural                |                      |                      |                      |                      |
|---------------|------------|----------------------|----------------------|----------------------|----------------------|----------------------|----------------------|----------------------|----------------------|----------------------|----------------------|
|               |            | 1999                 | 2004                 | 2007                 | 2011                 | 2014                 | 1999                 | 2004                 | 2007                 | 2011                 | 2014                 |
| Underweight   | 15-24      | 32.75 (28.78, 36.98) | 30.81 (27.83, 33.97) | 27.4 (24.41, 30.61)  | 20.14 (17.89, 22.6)  | 20.99 (18.44, 23.79) | 48.38 (45.86, 50.92) | 38.91 (36.79, 41.08) | 33.95 (31.7, 36.26)  | 34.01 (32.2, 35.87)  | 27.45 (25.42, 29.58) |
|               | 25-34      | 27.16 (23.64, 31)    | 20.91 (18.54, 23.5)  | 17.35 (15.12, 19.83) | 11.23 (9.68, 13)     | 8.34 (6.98, 9.92)    | 45.07 (42.38, 47.79) | 34.26 (32.21, 36.37) | 29.2 (27.08, 31.41)  | 24.12 (22.65, 25.66) | 17.81 (16.16, 19.6)  |
|               | 35-44      | 28.42 (20.42, 38.06) | 21.4 (18.58, 24.51)  | 14.18 (12.04, 16.63) | 9.53 (7.94, 11.4)    | 9.37 (7.69, 11.38)   | 57.48 (52.25, 62.55) | 35.4 (32.99, 37.89)  | 32.94 (30.5, 35.48)  | 24.75 (23.05, 26.53) | 17.98 (16.13, 19.99) |
|               | 45+        | 35.89 (8.84, 76.36)  | 30.27 (25.06, 36.03) | 20.51 (16.36, 25.39) | 12.56 (9.83, 15.92)  | 10.61 (7.61, 14.61)  | 60.97 (42.57, 76.7)  | 42.56 (38.75, 46.46) | 37.24 (33.25, 41.42) | 30.41 (27.56, 33.42) | 23.58 (20.29, 27.22) |
|               | Overall    | 29.73 (27.21, 32.39) | 24.84 (23.32, 26.42) | 19.54 (18.17, 20.99) | 13.46 (12.45, 14.54) | 12.2 (11.16, 13.34)  | 48.18 (46.47, 49.91) | 36.89 (35.7, 38.11)  | 32.44 (31.2, 33.71)  | 27.82 (26.91, 28.76) | 21.08 (20.06, 22.15) |
| Normal weight | 15-24      | 50.62 (46.22, 55.01) | 53.21 (49.83, 56.56) | 50.64 (47.17, 54.11) | 53.98 (50.91, 57.02) | 45.47 (42.22, 48.77) | 47.42 (44.89, 49.95) | 53.54 (51.33, 55.74) | 55.29 (52.86, 57.69) | 52.08 (50.14, 54)    | 50.84 (48.49, 53.18) |
|               | 25-34      | 41.45 (37.43, 45.59) | 44.68 (41.65, 47.75) | 41.3 (38.23, 44.45)  | 37.8 (35.15, 40.51)  | 32.71 (30.19, 35.34) | 46.8 (44.08, 49.54)  | 51.15 (48.95, 53.35) | 51.6 (49.21, 53.98)  | 48.32 (46.57, 50.08) | 44.57 (42.49, 46.67) |
|               | 35-44      | 45.09 (35.42, 55.14) | 37.9 (34.44, 41.5)   | 35.36 (32.17, 38.68) | 34 (31.08, 37.05)    | 27.75 (24.94, 30.74) | 35.71 (30.86, 40.88) | 46.98 (44.42, 49.55) | 47.49 (44.83, 50.16) | 47.15 (45.16, 49.15) | 42.17 (39.77, 44.61) |
|               | 45+        | 19.96 (4.12, 59.13)  | 33.66 (28.29, 39.49) | 36.66 (31.3, 42.36)  | 37.87 (33.33, 42.63) | 32.15 (27.54, 37.14) | 35.62 (20.55, 54.2)  | 40.37 (36.59, 44.27) | 41.94 (37.8, 46.2)   | 43.56 (40.47, 46.71) | 41.06 (37.55, 44.66) |
|               | Overall    | 45.64 (42.81, 48.51) | 44.47 (42.65, 46.3)  | 41.72 (39.93, 43.53) | 41.39 (39.8, 43)     | 34.72 (33.15, 36.33) | 45.76 (44.03, 47.49) | 49.82 (48.55, 51.08) | 50.72 (49.36, 52.08) | 48.58 (47.56, 49.61) | 45.29 (44.05, 46.53) |
| Overweight    | 15-24      | 14.31 (11.51, 17.65) | 12.51 (10.46, 14.89) | 17.63 (15.1, 20.47)  | 20.18 (17.81, 22.79) | 25.42 (22.67, 28.38) | 3.36 (2.58, 4.37)    | 6.7 (5.67, 7.89)     | 9.56 (8.19, 11.14)   | 11.81 (10.63, 13.1)  | 17.95 (16.33, 19.7)  |
|               | 25-34      | 23.9 (20.55, 27.6)   | 25.73 (23.15, 28.49) | 28.99 (26.19, 31.96) | 35.56 (32.95, 38.26) | 37.7 (35.09, 40.38)  | 6.74 (5.49, 8.24)    | 12.09 (10.72, 13.6)  | 15.66 (14, 17.48)    | 22.03 (20.61, 23.52) | 29.31 (27.47, 31.23) |
|               | 35-44      | 15.79 (9.58, 24.92)  | 26.82 (23.77, 30.11) | 33.17 (30.02, 36.48) | 35.55 (32.57, 38.66) | 37.62 (34.59, 40.74) | 6.1 (4.06, 9.08)     | 15.05 (13.29, 17)    | 15.67 (13.83, 17.71) | 22.4 (20.78, 24.1)   | 30.09 (27.93, 32.34) |
|               | 45+        | 26.19 (3.91, 75.55)  | 23.39 (18.71, 28.83) | 27.28 (22.51, 32.65) | 30.3 (26.11, 34.84)  | 31.21 (26.62, 36.19) | 3.4 (0.47, 20.56)    | 15 (12.32, 18.14)    | 16.66 (13.73, 20.07) | 20.06 (17.69, 22.67) | 27.57 (23.99, 31.47) |
|               | Overall    | 19.08 (16.95, 21.42) | 21.87 (20.42, 23.39) | 26.87 (25.28, 28.53) | 30.62 (29.14, 32.14) | 33.74 (32.19, 35.32) | 5.02 (4.33, 5.83)    | 11.35 (10.57, 12.18) | 13.87 (12.96, 14.84) | 18.96 (18.18, 19.78) | 26.24 (25.17, 27.34) |
| Obese         | 15-24      | 2.3 (1.28, 4.1)      | 3.44 (2.4, 4.92)     | 4.31 (3.07, 6.02)    | 5.67 (4.44, 7.22)    | 8.09 (6.49, 10.05)   | 0.82 (0.46, 1.44)    | 0.83 (0.51, 1.35)    | 1.18 (0.75, 1.86)    | 2.08 (1.59, 2.71)    | 3.74 (3.01, 4.64)    |
|               | 25-34      | 7.47 (5.54, 10)      | 8.65 (7.03, 10.6)    | 12.33 (10.41, 14.55) | 15.39 (13.48, 17.52) | 21.23 (18.96, 23.69) | 1.37 (0.86, 2.18)    | 2.47 (1.86, 3.29)    | 3.52 (2.72, 4.55)    | 5.51 (4.76, 6.36)    | 8.28 (7.32, 9.36)    |
|               | 35-44      | 10.68 (5.53, 19.6)   | 13.86 (11.59, 16.48) | 17.26 (14.78, 20.07) | 20.9 (18.41, 23.62)  | 25.24 (22.51, 28.19) | 0.68 (0.17, 2.71)    | 2.56 (1.83, 3.56)    | 3.88 (2.99, 5.02)    | 5.68 (4.83, 6.66)    | 9.74 (8.53, 11.1)    |
|               | 45+        | 17.94 (2.42, 65.83)  | 12.66 (9.27, 17.07)  | 15.53 (11.73, 20.29) | 19.25 (15.73, 23.34) | 26.01 (21.83, 30.67) | NA                   | 2.05 (1.2, 3.49)     | 4.14 (2.69, 6.32)    | 5.94 (4.64, 7.58)    | 7.77 (6.2, 9.69)     |
|               | Overall    | 5.52 (4.32, 7.04)    | 8.81 (7.84, 9.88)    | 11.85 (10.71, 13.08) | 14.51 (13.41, 15.69) | 19.32 (18.01, 20.69) | 1.02 (0.72, 1.44)    | 1.92 (1.59, 2.31)    | 2.95 (2.52, 3.45)    | 4.61 (4.2, 5.06)     | 7.37 (6.82, 7.97)    |

**Table S3.** Prevalence of BMI categories of reproductive women by age and place of residence in Bangladesh, BDHS 1999 - 2014 (International cutoff)

|               |  | Urban                |                      |                      |                      |                      | Rural                |                      |                      |                      |                      |
|---------------|--|----------------------|----------------------|----------------------|----------------------|----------------------|----------------------|----------------------|----------------------|----------------------|----------------------|
|               |  | 1999                 | 2004                 | 2007                 | 2011                 | 2014                 | 1999-00              | 2004                 | 2007                 | 2011                 | 2014                 |
| Underweight   |  | 32.75 (28.78, 36.98) | 30.81 (27.83, 33.97) | 27.4 (24.41, 30.61)  | 20.14 (17.89, 22.6)  | 20.99 (18.44, 23.79) | 48.38 (45.86, 50.92) | 38.91 (36.79, 41.08) | 33.95 (31.7, 36.26)  | 34.01 (32.2, 35.87)  | 27.45 (25.42, 29.58) |
|               |  | 27.16 (23.64, 31)    | 20.91 (18.54, 23.5)  | 17.35 (15.12, 19.83) | 11.23 (9.68, 13)     | 8.34 (6.98, 9.92)    | 45.07 (42.38, 47.79) | 34.26 (32.21, 36.37) | 29.2 (27.08, 31.41)  | 24.12 (22.65, 25.66) | 17.81 (16.16, 19.6)  |
|               |  | 28.42 (20.42, 38.06) | 21.4 (18.58, 24.51)  | 14.18 (12.04, 16.63) | 9.53 (7.94, 11.4)    | 9.37 (7.69, 11.38)   | 57.48 (52.25, 62.55) | 35.4 (32.99, 37.89)  | 32.94 (30.5, 35.48)  | 24.75 (23.05, 26.53) | 17.98 (16.13, 19.99) |
|               |  | 35.89 (8.84, 76.36)  | 30.27 (25.06, 36.03) | 20.51 (16.36, 25.39) | 12.56 (9.83, 15.92)  | 10.61 (7.61, 14.61)  | 60.97 (42.57, 76.7)  | 42.56 (38.75, 46.46) | 37.24 (33.25, 41.42) | 30.41 (27.56, 33.42) | 23.58 (20.29, 27.22) |
|               |  | 29.73 (27.21, 32.39) | 24.84 (23.32, 26.42) | 19.54 (18.17, 20.99) | 13.46 (12.45, 14.54) | 12.2 (11.16, 13.34)  | 48.18 (46.47, 49.91) | 36.89 (35.7, 38.11)  | 32.44 (31.2, 33.71)  | 27.82 (26.91, 28.76) | 21.08 (20.06, 22.15) |
| Normal weight |  | 60.28 (55.93, 64.48) | 60.8 (57.48, 64.02)  | 62.4 (58.97, 65.72)  | 66.43 (63.53, 69.2)  | 59.81 (56.54, 62.98) | 49.84 (47.3, 52.37)  | 58.05 (55.85, 60.21) | 61.86 (59.48, 64.18) | 59.97 (58.06, 61.85) | 61.91 (59.64, 64.13) |
|               |  | 55.78 (51.59, 59.89) | 57.51 (54.44, 60.52) | 56.31 (53.15, 59.41) | 57.53 (54.77, 60.23) | 51.95 (49.19, 54.7)  | 51.45 (48.72, 54.17) | 59.71 (57.54, 61.85) | 60.19 (57.82, 62.51) | 61.03 (59.3, 62.73)  | 60.12 (58.05, 62.16) |
|               |  | 53.39 (43.32, 63.19) | 50.67 (47.04, 54.3)  | 52.6 (49.17, 56)     | 51.3 (48.14, 54.45)  | 44.95 (41.78, 48.16) | 39.23 (34.25, 44.44) | 56.17 (53.61, 58.7)  | 57.42 (54.77, 60.02) | 61.14 (59.16, 63.07) | 59.66 (57.26, 62.01) |
|               |  | 19.96 (4.12, 59.13)  | 43.23 (37.44, 49.21) | 50.28 (44.61, 55.94) | 52.82 (48.04, 57.55) | 45.45 (40.36, 50.64) | 35.62 (20.55, 54.2)  | 50.06 (46.14, 53.98) | 54.54 (50.29, 58.72) | 55.41 (52.25, 58.52) | 56.51 (52.71, 60.24) |
|               |  | 57.4 (54.54, 60.21)  | 55.43 (53.6, 57.24)  | 56.33 (54.52, 58.14) | 57.89 (56.29, 59.47) | 51.49 (49.82, 53.16) | 49.17 (47.44, 50.9)  | 57.33 (56.08, 58.57) | 59.43 (58.09, 60.75) | 60.14 (59.13, 61.15) | 60.11 (58.89, 61.32) |
| Overweight    |  | 5.82 (4.11, 8.17)    | 6.59 (5.15, 8.41)    | 8.67 (6.88, 10.86)   | 11.08 (9.32, 13.12)  | 15.63 (13.42, 18.13) | 1.28 (0.82, 2.01)    | 2.91 (2.25, 3.75)    | 3.82 (2.96, 4.91)    | 5.34 (4.55, 6.25)    | 9.52 (8.33, 10.87)   |
|               |  | 14.07 (11.39, 17.26) | 17.65 (15.41, 20.15) | 21.33 (18.84, 24.05) | 24.61 (22.29, 27.09) | 31.22 (28.7, 33.85)  | 2.95 (2.14, 4.05)    | 5 (4.13, 6.05)       | 9.64 (8.32, 11.15)   | 13.06 (11.92, 14.29) | 19.1 (17.61, 20.68)  |
|               |  | 13.61 (7.8, 22.66)   | 22.23 (19.39, 25.35) | 25.93 (23.03, 29.06) | 30.21 (27.36, 33.23) | 33.2 (30.3, 36.23)   | 3.28 (1.86, 5.7)     | 7.67 (6.37, 9.21)    | 8.91 (7.5, 10.55)    | 12.01 (10.77, 13.37) | 18.54 (16.79, 20.42) |
|               |  | 44.14 (12.09, 81.39) | 21.23 (16.77, 26.51) | 21.68 (17.25, 26.88) | 24.62 (20.76, 28.93) | 30.73 (26.28, 35.57) | 3.4 (0.47, 20.56)    | 6.38 (4.69, 8.62)    | 7.07 (5.22, 9.52)    | 11.55 (9.72, 13.67)  | 17.18 (14.72, 19.95) |
|               |  | 10.57 (8.92, 12.47)  | 15.87 (14.59, 17.23) | 19.18 (17.78, 20.66) | 22.25 (20.93, 23.63) | 27.56 (26.11, 29.06) | 2.19 (1.73, 2.77)    | 5.1 (4.57, 5.69)     | 7.39 (6.71, 8.13)    | 10.39 (9.79, 11.03)  | 16.14 (15.3, 17.02)  |
| Obese         |  | 1.13 (0.49, 2.59)    | 1.78 (1.05, 2.99)    | 1.51 (0.85, 2.66)    | 2.33 (1.58, 3.43)    | 3.55 (2.47, 5.07)    | 0.48 (0.23, 0.99)    | 0.12 (0.03, 0.39)    | 0.36 (0.15, 0.81)    | 0.66 (0.4, 1.08)     | 1.1 (0.75, 1.6)      |
|               |  | 2.97 (1.81, 4.84)    | 3.9 (2.85, 5.32)     | 4.99 (3.83, 6.49)    | 6.61 (5.34, 8.16)    | 8.48 (6.98, 10.25)   | 0.51 (0.22, 1.13)    | 1.01 (0.63, 1.59)    | 0.95 (0.55, 1.64)    | 1.77 (1.37, 2.29)    | 2.95 (2.37, 3.67)    |
|               |  | 4.56 (1.61, 12.27)   | 5.68 (4.25, 7.54)    | 7.27 (5.66, 9.28)    | 8.94 (7.26, 10.96)   | 12.46 (10.37, 14.9)  | .                    | 0.74 (0.4, 1.37)     | 0.72 (0.4, 1.29)     | 2.08 (1.59, 2.72)    | 3.81 (3.04, 4.76)    |
|               |  | .                    | 5.25 (3.2, 8.51)     | 7.51 (4.96, 11.21)   | 9.98 (7.38, 13.36)   | 13.18 (10.08, 17.06) | .                    | 0.99 (0.43, 2.26)    | 1.13 (0.49, 2.58)    | 2.61 (1.78, 3.81)    | 2.71 (1.88, 3.9)     |
|               |  | 2.28 (1.54, 3.38)    | 3.85 (3.21, 4.61)    | 4.93 (4.2, 5.78)     | 6.38 (5.63, 7.23)    | 8.72 (7.79, 9.76)    | 0.43 (0.25, 0.74)    | 0.65 (0.47, 0.9)     | 0.72 (0.52, 1.01)    | 1.62 (1.38, 1.9)     | 2.64 (2.31, 3.03)    |

**Table S4.** Variance inflation (VIF) values of final models of urban and rural women, BDHS 1999-2014

| Variables                        | VIF- Urban | VIF-Rural |
|----------------------------------|------------|-----------|
| Age                              | 1.09       | 1.29      |
| Education                        | 2.03       | 1.97      |
| Marital status                   | 1.18       | 1.12      |
| Wealth index                     | 1.49       | 1.69      |
| Watching TV at least once a week | 1.29       | 1.32      |
| Currently working                | 1.08       | 1.04      |
| No. of household members         | 1.04       | 1.05      |
| Contraceptive use                | 1.12       | 1.09      |
| Husband education                | 2.03       | 1.71      |
| Survey year                      | 1.02       | 1.05      |

**Figure S1.** Prevalence of BMI categories International cutoff

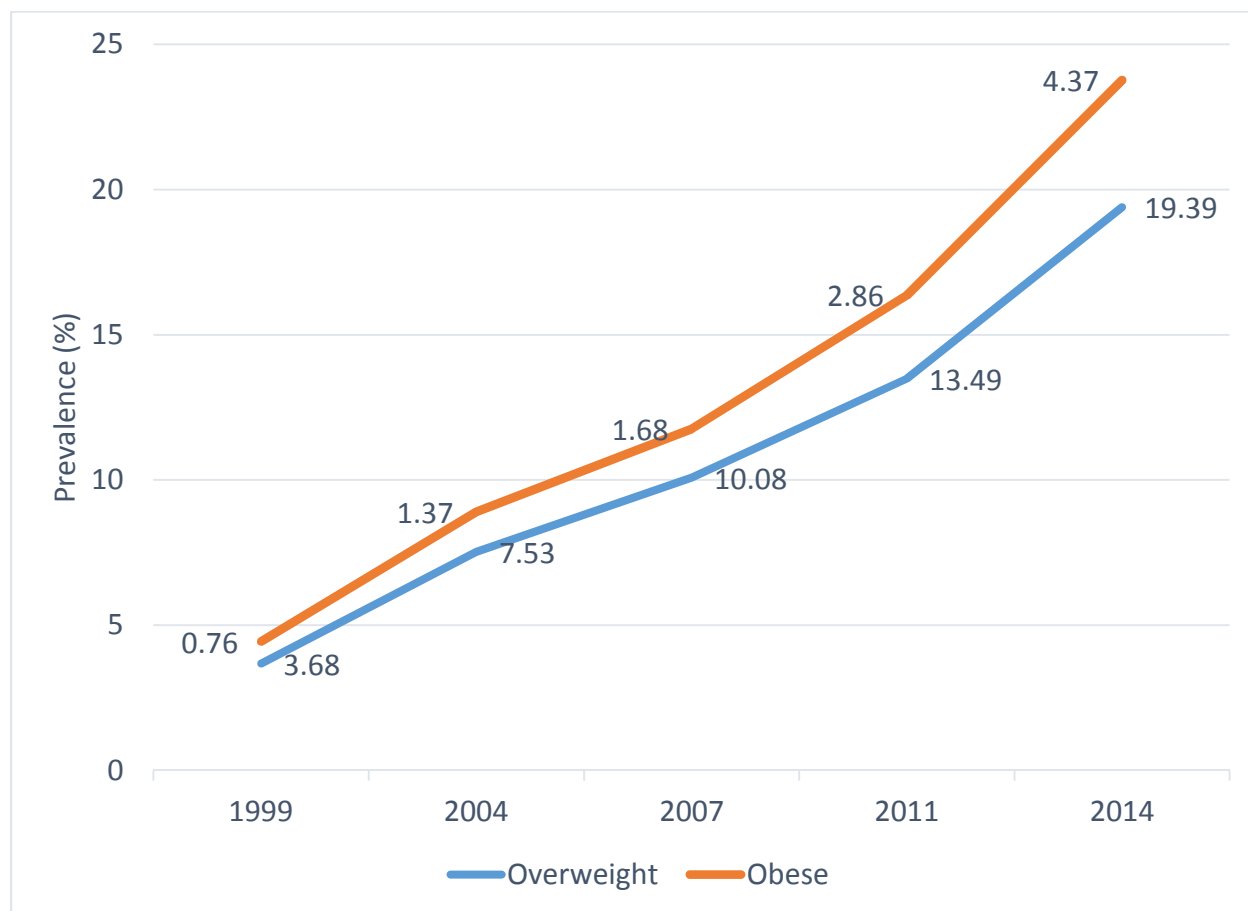



**Figure S2.** Prevalence of underweight, normal, overweight, and obesity by year and place of residence BDHS 1999-2014 (International cutoff).

(a) Urban

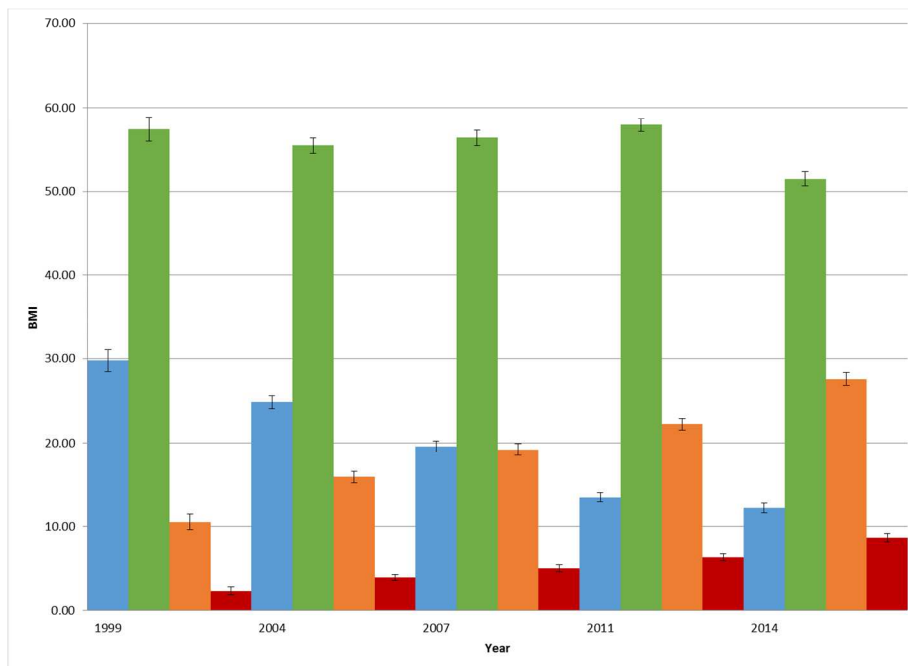

(b) Rural

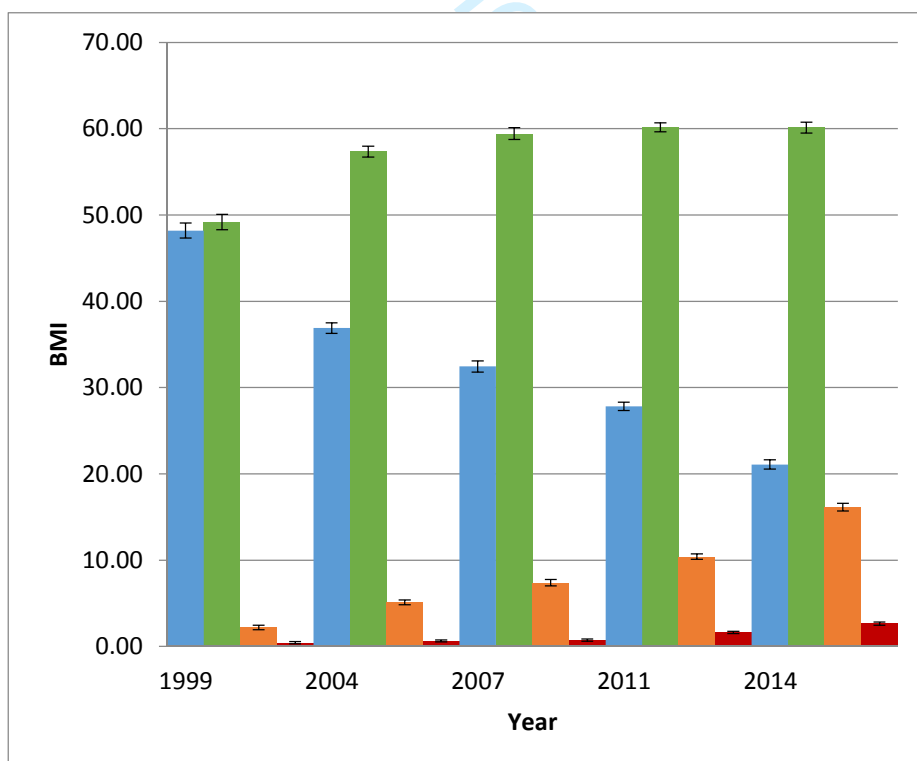

# BMJ Open

## Trends, prevalence, and risk factors in overweight and obesity among women of reproductive age in Bangladesh: a pooled analysis of five national cross-sectional surveys

|                                 |                                                                                                                                                                                                                                                                                   |
|---------------------------------|-----------------------------------------------------------------------------------------------------------------------------------------------------------------------------------------------------------------------------------------------------------------------------------|
| Journal:                        | <i>BMJ Open</i>                                                                                                                                                                                                                                                                   |
| Manuscript ID                   | bmjopen-2017-018468.R1                                                                                                                                                                                                                                                            |
| Article Type:                   | Research                                                                                                                                                                                                                                                                          |
| Date Submitted by the Author:   | 13-Feb-2018                                                                                                                                                                                                                                                                       |
| Complete List of Authors:       | Chowdhury, Muhammad Abdul Baker; University of Florida, Emergency Medicine<br>Adnan, Md. Mohiuddin; University of Mississippi Medical Center, Department of Data Science<br>Hassan, Md Zakiul; International Centre for Diarrhoeal Disease Research, Infectious Diseases Division |
| <b>Primary Subject Heading</b>: | Epidemiology                                                                                                                                                                                                                                                                      |
| Secondary Subject Heading:      | Epidemiology, Public health                                                                                                                                                                                                                                                       |
| Keywords:                       | obesity, reproductive women, body mass index, trends, risk factors                                                                                                                                                                                                                |
|                                 |                                                                                                                                                                                                                                                                                   |

SCHOLARONE™  
Manuscripts

1  
2  
3 **Trends, prevalence, and risk factors in overweight and obesity among women of**  
4 **reproductive age in Bangladesh: a pooled analysis of five national cross-sectional surveys**  
5  
6

7 Muhammad Abdul Baker Chowdhury<sup>\*,a</sup>, MPH, MPS, M.Sc.; Md. Mohiuddin Adnan<sup>b</sup>, M.Sc.; Zakiul Hassan<sup>c</sup>, MBBS  
8  
9

10  
11  
12 **Author affiliation**

13 <sup>a</sup> Clinical Biostatistician, Department of Emergency Medicine, College of Medicine, University of Florida,  
14 Gainesville, FL 32610, USA, Phone: 352.265.5911 (Ext: 31458)

15  
16 <sup>b</sup> Graduate Assistant, Department of Data Science, School of population Health,  
17 University of Mississippi Medical Center, Jackson, MS 39216, USA, phone: +1 (912) 541 -3572

18  
19 <sup>c</sup> Research Investigator, Programme for Emerging Infections, Infectious Diseases Division, International  
20 Centre for Diarrhoeal Disease Research (icddr, b), Bangladesh, Phone: +88 02 8860523- 32 (Extension:  
21 2547); Mobile: +8801753866573  
22  
23  
24  
25

26  
27 \* Corresponding author

28 **Author email address (s)**

29  
30 MC: [mchow023@fiu.edu](mailto:mchow023@fiu.edu)

31  
32 MA: [ma04541@georgiasouthern.edu](mailto:ma04541@georgiasouthern.edu)

33  
34 ZH: [zhassan@icddr.org](mailto:zhassan@icddr.org)  
35  
36  
37  
38  
39  
40  
41  
42  
43  
44  
45  
46  
47  
48  
49  
50  
51  
52  
53  
54  
55  
56  
57  
58  
59  
60

## Abstract

**Objective:** To determine trends the prevalence and risk factors of overweight and obesity among Bangladeshi reproductive-age women from 1999-2014.

**Design:** The study team analyzed nationally representative data from repeated cross-sectional Bangladesh Demographic and Health Survey (BDHS) in 1999, 2004, 2007, 2011, and 2014.

**Setting:** Country of Bangladesh.

**Participants:** Women age 15- 49 years.

**Primary outcome:** Overweight/ Obesity.

**Results:** A total of 58,192 women whose body mass index (BMI) was available were included in the analysis. The prevalence of overweight and obesity among reproductive-age women increased significantly from 7.53% (95% CI: 6.83, 8.29) and 1.82% (CI: 1.48, 2.24) in 1999 to 28.37% (CI: 27.49, 29.28) and 10.77% (CI: 10.22, 11.35) in 2014, respectively. Age, education, wealth index, watching TV, and contraceptive use were associated with overweight and obesity in both urban and rural areas.

**Conclusions:** Overweight and obesity prevalence increased significantly among Bangladeshi reproductive-age women between 1999 and 2014. Development of effective low-cost strategies to address the increasing burden of obesity should be a high priority.

**Keywords:** Body mass index (BMI), overweight, obesity, trends, BDHS, Bangladesh.

### Strengths and limitations of this study

- To our knowledge, this is the first study in Bangladesh to compare longitudinal (15 years) trends in prevalence and risk factors associated with overweight/obesity in rural and urban women using nationally representative data.
- The analysis accounted for complex survey design (clustering, stratification, sample weights) which gives accurate estimates for the country population. Survey year was used as a predictor for the first time in Bangladeshi population which provides incremental change in overweight/ obesity over time
- The surveys did not include responses on diet, fruit and vegetable - intake or physical activity, which are important predictors of overweight, and obesity. The surveys collected body mass index data for reproductive-age (15-49 years) women, therefore, the results may not be generalizable to older women's (>49 years) or for men.

## Introduction

Obesity is a growing global public health concern<sup>1</sup>. An estimated two billion adults were reported to have overweight or obesity in 2014 with a worldwide prevalence of 39%<sup>1,2</sup>. Obesity increases the risk of many serious chronic health conditions such as hypertension, prediabetes, type 2 diabetes, dyslipidemia, cardiovascular diseases, certain cancers, and metabolic syndrome<sup>2-4</sup>. With a J-shaped (slight upward trend with a low BMI and steep increase with higher BMI) relationship between body mass index(BMI) and mortality, obesity has a high risk of mortality<sup>5</sup>.

While the impact of overweight and obesity epidemic in developed countries has been highlighted<sup>6</sup>, recent studies demonstrate that the prevalence of obesity has increased significantly in many developing countries<sup>7</sup>. This trend of increasing overweight and obesity will likely continue to rise in the developing world<sup>8</sup>. Bangladesh, a low-income country in South East Asia, has also observed an increasing prevalence of overweight and obesity. Like many developing countries, Bangladesh has experienced demographic and nutritional changes amongst the population such as changing lifestyle (e.g. high calorie food intake, sedentary life style) and urbanization. The rate of serious chronic health conditions in Bangladesh has increased steadily and death attributable to chronic conditions climbed from 8% in 1986 to 68% in 2006<sup>6</sup>. Traditionally, infectious diseases<sup>9</sup> and under-nutrition<sup>10</sup> were major public health problems in the country and less attention has focused on overweight and obesity by public health officials.

1  
2  
3 Data on the overweight and obesity trend in Bangladesh are sparse. Few of the studies that  
4 reported the prevalence of obesity were cross-sectional and data were limited to one year or  
5  
6 less<sup>11</sup> and included only specific participants (e.g. diabetic patients, schoolchildren etc.)<sup>12</sup>.  
7

8  
9  
10 Further, the change in sociodemographic factors associated with the rising incidence of  
11  
12 overweight and obesity in Bangladesh has not been well studied. Moreover, the scale to  
13  
14 determine BMI categories varied widely in prior studies and most used scales other than the  
15  
16 World Health Organization (WHO) recommended Asian standard BMI classification.  
17  
18

19  
20  
21  
22 Overweight and obesity vary significantly between men and women<sup>13</sup>. Reproductive-age  
23  
24 women have higher rates of overweight and obesity and are more adversely affected by  
25  
26 obesity-related complications<sup>14</sup>. This gender difference is mainly due to general weight gain  
27  
28 during child bearing years, gestational weight gain and/or weight retention, adverse lifestyle, or  
29  
30 risk factors associated with pregnancy and the postpartum period<sup>15</sup>. Maternal obesity increases  
31  
32 the risk of numerous complications of pregnancy, labor, and birth for both mother and child,  
33  
34 including diabetes and hypertensive disorders<sup>14,16</sup>. Compared with normal weight, maternal  
35  
36 overweight is associated with a higher risk of cesarean delivery and a higher incidence of  
37  
38 anesthetic and postoperative complications<sup>17,18</sup>. Low Apgar scores, macrosomia, and neural  
39  
40 tube defects are also more frequent in infants of obese mothers compared with infants of  
41  
42 normal-weight mothers<sup>17,18</sup>.  
43  
44  
45  
46  
47  
48

49  
50 Understanding the obesity trend and identifying modifiable sociodemographic factors  
51  
52 responsible for overweight and obesity among this high-risk group may help inform the  
53  
54 development of feasible public health interventions to reduce the burden of obesity and  
55  
56  
57  
58  
59  
60

1  
2  
3 associated adverse health outcomes. We used nationally representative data from the  
4  
5 Bangladesh Demographic and Health Survey (BDHS) to estimate the trends in overweight and  
6  
7 obesity and to identify socio-demographic factors associated with overweight and obesity  
8  
9 among reproductive-age women in Bangladesh over a 15-year period between 1999 and 2014.  
10  
11

## 12 **Method**

### 13 *Data sources*

14  
15 We analyzed publicly available data from the 1999, 2004, 2007, 2011, and 2014 BDHS. The  
16  
17 BDHS is a nationally representative series of cross-sectional surveys of the non-institutionalized  
18  
19 Bangladeshi population. It was developed over decades, progressively adopting standardized  
20  
21 demographic and health survey items designed to provide data for monitoring the population  
22  
23 and health situation in Bangladesh. The Bangladesh Ministry of Health and Family Welfare and  
24  
25 the National Institute of Population Research and Training (NIPORT), has been conducting the  
26  
27 survey at three year intervals since 1993<sup>19</sup>.  
28  
29  
30  
31  
32  
33

### 34 *Sampling design and sample size*

35  
36 All BDHS surveys used a two-staged stratified sampling procedure. In the first stage,  
37  
38 enumeration areas were selected with a probability proportional to population size. Population  
39  
40 size was based on the master sampling frame of the 2001 and 2011 population and housing  
41  
42 census prepared by the Bangladesh Bureau of Statistics<sup>20</sup>. In the second stage, systematic  
43  
44 household sampling was conducted from each sampling unit to provide a statistically reliable  
45  
46 estimate of key demographic and health-related variables. The details of the BDHS methods are  
47  
48 available elsewhere<sup>19</sup>. The surveys include 10544, 11440, 10996, 17842, and 17863 women,  
49  
50 from the 1999, 2004, 2007, 2011, and 2014 surveys, respectively. We excluded participants  
51  
52  
53  
54  
55  
56  
57  
58  
59  
60



1  
2  
3 below 15 years of age, participants with missing values for measured height and weight, and  
4  
5 women who were pregnant at the time of the survey. After applying exclusion criteria, the total  
6  
7 sample consisted of 58,192 women.  
8  
9

### 10 *Outcome*

11  
12 The primary outcome variable of this study was BMI calculated as weight in kilograms divided  
13  
14 by height in meters squared. In the analysis, we used BMI classifications recommended by WHO  
15  
16 for Asian population: normal weight (18.5 to <23.0), moderate risk or overweight (23.0 to  
17  
18 <27.5), and high risk or obese ( $\geq 27.5$ )<sup>21</sup>. We also conducted analyses using WHO and National  
19  
20 Institutes of Health BMI classification for the general population: underweight (<18.5), normal  
21  
22 weight (18.5 to <25.0), overweight (25.0 to <30.0), and obese ( $\geq 30.0$ )<sup>22</sup>.  
23  
24  
25  
26

### 27 *Covariates*

28  
29 We choose covariates hypothesized to be associated with overweight and obesity based on  
30  
31 literature review. Socio-demographic characteristics included age (15-24, 25-34, 35-44, 45+),  
32  
33 marital status (married, not married), education (no education, primary, secondary, and  
34  
35 higher), place of residence (rural, urban), geographic region (south (Barishal), southeast  
36  
37 (Chittagong), central (Dhaka), west (Khulna), mid-western corner (Rajshahi), northwest  
38  
39 (Rangpur), and east (Sylhet)), wealth index (poorest, poorer, middle, rich, and richest),  
40  
41 employment status (yes, no), watching TV at least once a week (yes or no), number of living  
42  
43 children (0, 1-2, 3-4, and  $\geq 5$ ), number of household members (1-2, 3-4, and  $\geq 5$ ), contraceptive  
44  
45 use (not using any method, using pill, and other methods), and survey year. Survey year was  
46  
47 treated as a categorical variable. The BDHS surveys provide a household wealth index estimated  
48  
49 using multiple household and asset variables. Principle component analysis was used for the  
50  
51  
52  
53  
54  
55  
56  
57  
58  
59  
60

1  
2  
3 estimation. The household level variables include having electricity, type and source of drinking  
4  
5 water, access to a sanitation facility, availability of cooking fuel, main roof material, main wall  
6  
7 material and floor material. The asset variables are having wardrobe, table, chair or bench,  
8  
9 watch or clock, radio, television, bicycle, motorcycle, sewing machine, telephone and land  
10  
11 ownership.  
12  
13  
14  
15

### 16 *Statistical analysis*

17  
18 Descriptive statistics (e.g. mean, frequencies) were calculated to define the characteristics of  
19  
20 survey participants. All five surveys were appended given that a similar survey protocol in terms  
21  
22 of design, scope, coverage, sampling, data collection, coding, and weighting was used across  
23  
24 surveys. This approach simplified reporting estimates and improved statistical power of the  
25  
26 analyses. The distributions of BMI at each survey year were compared between rural and urban  
27  
28 populations using kernel density plots. The BMI trend over the 15-year period was assessed by  
29  
30 linear regression with time interval (survey year) as primary predictor. The nature, strength,  
31  
32 and direction of the association between women's socio-demographic characteristics and the  
33  
34 BMI categories was assessed using multinomial logistic regression models with adjusted risk  
35  
36 ratios (ARR) and 95% confidence intervals (CI) for urban and rural study participants separately.  
37  
38 All analysis was performed using the statistical software, StataMP13.0 version (StataCorp LP,  
39  
40 College Station, TX). We used the "svy" procedures to adjust for the sample stratification and  
41  
42 clustering effect in all further analyses at the time of each survey. We used forward, backward,  
43  
44 and stepwise model selection procedures to select the best predicting model. Variance inflation  
45  
46 factor was also calculated to check the collinearity of the predictor variables and the outcome  
47  
48 for both urban and rural sample (**Table S1**).  
49  
50  
51  
52  
53  
54  
55  
56  
57  
58  
59  
60

### *Ethical approval*

All BDHS surveys received ethical approval from ICF Macro Institutional Review Board, Maryland, USA and National Research Ethics Committee of Bangladesh Medical Research Council, Dhaka, Bangladesh.

## **Results**

### *Socio-demographic characteristics*

A total of 68,685 women participated across the five surveys. BMI data was available for 62,059 study participants and the survey response rates ranged between 96.9% and 98.6% from 1999 to 2014 (**Table S2**). We examined the changes in the shape of BMI distributions among Bangladeshi reproductive-age women between 1999, 2004, 2007, 2011, and 2014 using Kernel density plot by urban and rural areas (**Figure 1**). Both urban and rural BMI distribution curves appear to be skewed to the right over the 15-year period indicating a gradual increase in BMI. **Table 1** shows the socioeconomic and demographic characteristics of study participants across survey years. Over time, the mean age of study participants increased from 25 ( $\pm 6.63$ ) to 32 ( $\pm 9.12$ ) years. There was a significant reduction in the proportion of women with no education from 45% to 26% ( $p < 0.001$ ) between 1999 and 2014. Similarly, the proportion of women with higher education increased almost two-fold (4.19% to 8.32%). The frequency of watching television increased approximately 1.6 times and the proportion of working-women almost doubled (18.81 vs. 34.15%) over the study period. There was a significant change in the family structure during the study period. Five or more living children per women dropped from 12.63% to 8.11%.

### *Trends in overweight and obesity*

We present trends in overweight and obesity prevalence over the study period in **Figure 2**. The overall prevalence of overweight-increased almost four fold (7.53% to 28.37%) and prevalence of obesity increased almost five-fold (1.82% to 10.77%) over the fifteen-year period. **Figure 3** demonstrates the prevalence of BMI categories by place of residence. In urban areas, the prevalence of underweight declined to 12.21% in 2014 from 29.74% in 1999 and in rural areas, it dropped to 21.09% in 2014 from 48.18% in 1999. There was a 1.76 and 3.5-fold increase in overweight, 5.12, and 7.23-fold increase in obesity in the prevalence of overweight and obesity in urban and rural areas, respectively (**Figure 3**).

### *Prevalence of overweight and obesity*

**Table S3** shows the overall prevalence of BMI categories by age groups and place of residence. The prevalence of individuals with overweight and obesity increased across the five survey years for women residing in both urban and rural areas across all age groups. The prevalence of underweight and normal weight decreased in both rural and urban areas. Based on the Asian BMI cutoffs, the overall prevalence of overweight in rural and urban women increased from 19.08% (95% CI: 16.95, 21.42) and 5.02% (95% CI: 4.33, 5.83) in 1999 to 33.74% (95% CI: 32.19, 35.32) and 26.24% (95% CI: 25.17, 27.34) in 2014, respectively. Similarly, the prevalence of obesity increased from 5.52% (95% CI: 4.32, 7.04) and 1.02% (95% CI: 0.72, 1.44) in 1999 to 19.32% (95% CI: 18.01, 20.69) and 7.37% (95% CI: 6.82, 7.97) in 2014 in urban and rural areas, respectively. The steepest increase of overweight was observed among women age 35-44 years from 15.79% and 6.10 % in 1999 to 37.62% and 30.09% in 2014 in urban and rural areas, respectively. The prevalence of obesity increased almost three fold among women aged 25-34

1  
2  
3 years from 7.47% and 1.37% in 1999 to 21.23% and 8.28% in 2014 in urban and rural areas,  
4  
5 respectively. The prevalence estimates of BMI for urban and rural women differed when the  
6  
7 international BMI cutoffs were used (**Table S4**). A sharp decline was also observed in  
8  
9  
10  
11  
12  
13  
14  
15  
16  
17  
18  
19  
20  
21  
22  
23  
24  
25  
26  
27  
28  
29  
30  
31  
32  
33  
34  
35  
36  
37  
38  
39  
40  
41  
42  
43  
44  
45  
46  
47  
48  
49  
50  
51  
52  
53  
54  
55  
56  
57  
58  
59  
60  
underweight (urban- 29.73% to 12.2%; rural- 48.18% to 21.08%) during 1999 to 2014 applying  
the international BMI standard. Across urban and rural and all survey years, the prevalence of  
overweight and obesity using the Asian-specific guidelines was 2.10 to 2.5 times higher than  
prevalence estimates based on the international guidelines (**Figure S1, S2**).

### *Risk factors of overweight or obesity*

The adjusted association of overweight and obesity is presented in **Table 2**. Overall, the risk factors of overweight and obesity differed between urban and rural women. Increasing age was associated with higher overweight and obesity risk among both rural and urban residents though the association was stronger among urban residents. The highest overweight (ARR: 3.14, 95% CI: 2.74, 3.59) and obesity (ARR: 6.77, 95% CI: 5.56, 8.24) risk were for the urban women in the age group 35-44 years compared to women 15-24 years of age. The risk of overweight and obesity were high for urban women with higher educational level, married women, higher social status, and women whose husband had a higher educational level. In terms of wealth index, there was significant risk variation between urban and rural study participants. The middle, richer, and richest rural women had of 1.63, 2.55, and 5.85 higher odds of being overweight compared to the women in the poorest wealth index group. The odds of being obese was 2.30, 3.94, and 7.88 times higher for middle, richer, and richest rural women, respectively. Married women in urban areas had a 27% higher risk of overweight (ARR: 1.27, 95% CI: 1.04, 1.56) and 41% higher obesity (ARR: 1.41, 95% CI: 1.07, 1.86) risk compared

1  
2  
3 with unmarried women. Marital status was not significantly associated with overweight or  
4  
5 obesity in rural women. Watching TV at least once a week was an independent risk factor for  
6  
7 overweight and obesity among both urban and rural women and the risk was stronger among  
8  
9 urban women. In the adjusted model, women who watched TV at least once a week had 28%  
10  
11 (ARR: 1.28, 95% CI: 1.13, 1.45) and 72% (ARR: 1.72, 95% CI: 1.43, 2.07) higher risk of being  
12  
13 overweight and obese, respectively compared with women who do not watch TV at least once  
14  
15 a week.  
16  
17  
18

19  
20 Women's employment status was only associated with overweight or obesity for urban  
21  
22 residents. Working urban women had a lower probability of being overweight (ARR: 0.79, 95%  
23  
24 CI: 0.71, 0.89) or obese (ARR: 0.54, 95% CI: 0.46, 0.64) compared with those who do not  
25  
26 work. Women in rural areas with five or more household members had a lower probability of  
27  
28 being overweight (ARR: 0.71, 95% CI: 0.60, 0.84) and obese (ARR: 0.61, 95% CI: 0.45, 0.81)  
29  
30 compared with women with two or fewer household members. Compared to the 2004 survey,  
31  
32 the risk of being overweight significantly increased with each subsequent survey year in urban  
33  
34 and rural areas. For the increase of one survey period, the risk of overweight and obesity was  
35  
36 much stronger in rural areas compared with urban areas after adjusting for all predictors. For  
37  
38 example, in the most recent 2014 survey, the odds of being overweight was 2.60 (95% CI: 2.33,  
39  
40 2.89) and 2.07 (95% CI: 1.18, 2.37) times higher among rural and urban women respectively as  
41  
42 compared to 2004 survey year. Similarly, the odds of being obese were 4.47 (95% CI: 3.59, 5.57)  
43  
44 3.23 (95% CI: 2.71, 3.86) times higher for rural and urban women respectively as of 2004 survey  
45  
46 year.  
47  
48  
49  
50  
51  
52  
53  
54  
55  
56  
57  
58  
59  
60

## Discussion

We identified an increasing trend of overweight and obesity among Bangladeshi reproductive-age women with a five-fold increase of obesity between 1999 and 2014. This trend suggests that Bangladesh may continue to experience an obesity epidemic and highlights the risk of future adverse health outcome associated with overweight and obesity. Overweight and obesity puts women at increased risk of many adverse health outcomes, including cardiovascular disease, diabetes, kidney disease, and obesity-related cancers<sup>3,4,23</sup>. These women are also more likely to develop pregnancy complications, such as gestational diabetes, hypertensive disorders of pregnancy, cesarean section delivery and adverse fetal outcome<sup>14,16</sup>. Although Bangladesh has made substantial progress in reducing death from pregnancy-related complications in the last several decades, pregnancy-associated risks remain high. The increasing trend of obesity among reproductive-age women may create new challenges<sup>24,25</sup>. Our findings of an increasing longitudinal prevalence of overweight and obesity is consistent with findings from neighboring countries, current trends in most developing countries, as well as across the globe<sup>2</sup>. This trend could be explained by substantial lifestyle changes including changes in eating habits with more energy-dense food intake and sedentary lifestyles with reduced physical activity patterns<sup>26</sup>. These changes have been observed in Bangladesh with rapid economic growth, urbanization, modernization, and globalization of the food market<sup>27</sup>.

We found the highest increase in the prevalence of overweight and obesity among women aged 35-44 years. Studies from other low-income countries showed that older women (aged 45-49) are at greatest risk of overweight and obesity<sup>28</sup>. Because we did not include women

1  
2  
3 older than 49 years of age, the actual number of obese women might be much higher in  
4  
5 Bangladesh. Our study also showed that the increasing rate of overweight and obesity was  
6  
7 more marked in rural areas than urban areas whereas the rate of decline of undernutrition was  
8  
9 much higher in urban areas. This disparity may be the result of multiple factors. Reduction in  
10  
11 poverty leads to improvement in the nutritional status<sup>29</sup>. For example, Haddad *et al.* showed  
12  
13 that an increase in income at the household and national levels can significantly improve  
14  
15 nutritional status<sup>30</sup>. Bangladesh has made progress in increasing per-capita income, particularly  
16  
17 since the second half of the 1990s when growth in per-capita income accelerated to 3.6% per  
18  
19 year<sup>31</sup>. However, this income growth has primarily occurred among the rich and decreased  
20  
21 among the poor, widening the gap between the richest and the poorest<sup>32</sup>. The income Gini  
22  
23 coefficient (measures income inequality and a greater value represents greater inequality)  
24  
25 shows an increase from 0.432 in 1995 to 0.451 in 2000 and to 0.458 in 2010 mostly because of  
26  
27 increasing inequality between urban and rural areas<sup>32</sup>. Therefore, this income inequality  
28  
29 between the rich and the poor and between urban and rural populations, and the decline in  
30  
31 food consumption could partly explain the slow reduction of the number of underweight  
32  
33 women in urban areas. Our data showed that over the last 15 years, the number of educated  
34  
35 and employed urban women increased significantly in Bangladesh. Because educational status  
36  
37 and employment are both negatively associated with obesity, this might explain the variation in  
38  
39 overweight and obesity between urban and rural women<sup>33</sup>.

40  
41 We determined that educational status including the husband's educational status, marital  
42  
43 status, wealth index, self-reported hours of television watching, and employment status were  
44  
45 significantly associated with overweight and obesity. Our study showed that compared with  
46  
47  
48  
49  
50  
51  
52  
53  
54  
55  
56  
57  
58  
59  
60



1  
2  
3 women who have no education women with higher educational status were at increased risk of  
4  
5 overweight and obesity. Highly educated women are more likely to have a sedentary job  
6  
7 requiring less physical activity and hence have an increased risk of weight gain. Studies from  
8  
9 other developing countries also demonstrate a positive association between level of education  
10  
11 and obesity, however, a negative association between the two variables has been observed  
12  
13 primarily in developed countries<sup>33</sup>. Our findings that wealthier women are more likely to be  
14  
15 overweight or obese are consistent with studies done in other low and middle-income  
16  
17 countries<sup>34</sup>. This is likely due to the fact that increasing wealth in lower income countries results  
18  
19 in greater access to food, an escape from physical labor and a higher risk of obesity.  
20  
21  
22  
23

24  
25 We found that television watching was an independent predictor of overweight and obesity.  
26  
27 Television viewing has been used as a proxy for sitting time and studies that follow participants  
28  
29 over long periods of time have consistently found that people who spend more time watching  
30  
31 television are more likely to gain weight<sup>35</sup>. Unemployed Bangladeshi women spend a significant  
32  
33 amount of time watching television as a leisure activity. Moreover, with the economic growth  
34  
35 increasing access to television suggest that viewing television may further increase which may  
36  
37 further contribute obesity of this group.  
38  
39  
40

41  
42 Because geographical, ethnic, and cultural variation have large impacts on trends of overweight  
43  
44 and obesity, we used the Asian BMI standard instead of international guidelines. The  
45  
46 prevalence estimate of overweight and obesity using the Asian BMI category across all survey  
47  
48 years was 2.10 to 2.50 times higher compared with estimates based on the international  
49  
50 guidelines. Evidence have shown that Asian populations are at an increased risk of cardio-  
51  
52 metabolic disorders at lower BMI levels than other ethnic groups, attributed to a considerably  
53  
54  
55  
56  
57  
58  
59  
60

1  
2  
3 higher body fat percentage<sup>36</sup>. For this reason, in 2004 the WHO recommended lowering the  
4  
5 BMI cut-offs for Asian adults for overweight from 25 to 23 kg/m<sup>2</sup> and for obesity from 30 to  
6  
7 27.5 kg/m<sup>2</sup><sup>21</sup>. Previous reports that used international BMI classification in estimating  
8  
9 overweight and obesity prevalence in Asians may have underestimated adverse health risks.  
10  
11 Our analysis has several limitations. We used secondary cross-sectional data limiting our ability  
12  
13 to identify a causal relationship between predictors and overweight and obesity. Moreover, the  
14  
15 dataset lacks some key variables including eating habits, physical activity, and smoking.  
16  
17 Evidence showed that these factors strongly influence weight gain and may interact with other  
18  
19 predictors of obesity such as wealth and education. However, the study included representative  
20  
21 sample across Bangladesh including both urban and rural women and used the Asian BMI  
22  
23 category for the analysis strengthening our evidence base.  
24  
25  
26  
27  
28

### 29 30 **Conclusion**

31  
32 Overweight and obesity increased among Bangladeshi reproductive-age women between 1999  
33  
34 and 2014. Sociodemographic factors including age, education, wealth index, marital status,  
35  
36 television watching, and employment status were associated with the increased trend of  
37  
38 overweight and obesity. The prevalence and risk factors of overweight and obesity varied  
39  
40 between urban and rural women. Further research should focus on identifying other behavioral  
41  
42 risk factors associated with overweight and obesity and identify feasible interventions for those  
43  
44 most at risk.  
45  
46  
47  
48  
49  
50  
51  
52  
53  
54  
55  
56  
57  
58  
59  
60

## References

1. Organization WH. Obesity and overweight. 2016; <http://www.who.int/mediacentre/factsheets/fs311/en/>. Accessed March 24, 2017.
2. Ng M, Fleming T, Robinson M, et al. Global, regional, and national prevalence of overweight and obesity in children and adults during 1980–2013: a systematic analysis for the Global Burden of Disease Study 2013. *The Lancet*. 2014;384(9945):766-781.
3. Chowdhury MAB, Uddin MJ, Haque MR, Ibrahimou B. Hypertension among adults in Bangladesh: evidence from a national cross-sectional survey. *BMC Cardiovascular Disorders*. 2016;16(1):22.
4. Chowdhury MAB, Uddin MJ, Khan HM, Haque MR. Type 2 diabetes and its correlates among adults in Bangladesh: a population based study. *BMC Public Health*. 2015;15:1070.
5. Organization WH. The Asia-Pacific perspective: redefining obesity and its treatment. Sydney: Health Communications Australia; 2000.
6. Swinburn BA, Sacks G, Hall KD, et al. The global obesity pandemic: shaped by global drivers and local environments. *The Lancet*. 2011;378(9793):804-814.
7. Cohen E, Boetsch G, Palstra F, Pasquet P. Social valorisation of stoutness as a determinant of obesity in the context of nutritional transition in Cameroon: The Bamiléké case. *Social Science & Medicine*. 2013;96:24-32.
8. Ziraba AK, Fotso JC, Ochako R. Overweight and obesity in urban Africa: A problem of the rich or the poor? *BMC public health*. 2009;9(1):465.
9. Snyder JD, Merson MH. The magnitude of the global problem of acute diarrhoeal disease: a review of active surveillance data. *Bulletin of the world Health Organization*. 1982;60(4):605.
10. Müller O, Krawinkel M. Malnutrition and health in developing countries. *Canadian Medical Association Journal*. 2005;173(3):279-286.
11. Sarma H, Saquib N, Hasan MM, et al. Determinants of overweight or obesity among ever-married adult women in Bangladesh. *BMC Obes*. 2016;3:13.
12. Akter J, Shahjahan M, Hossain S, et al. Determinants of overweight and obesity among Bangladeshi diabetic women of reproductive age. *BMC Res Notes*. 2014;7:513.
13. Khan M, Krämer A. Factors associated with being underweight, overweight and obese among ever-married non-pregnant urban women in Bangladesh. *Singapore medical journal*. 2009;50(8):804.
14. Cedergren MI. Maternal morbid obesity and the risk of adverse pregnancy outcome. *Obstetrics & Gynecology*. 2004;103(2):219-224.
15. Gunderson EP. Childbearing and obesity in women: weight before, during, and after pregnancy. *Obstetrics and gynecology clinics of North America*. 2009;36(2):317-332.
16. Baeten JM, Bukusi EA, Lambe M. Pregnancy complications and outcomes among overweight and obese nulliparous women. *American journal of public health*. 2001;91(3):436.
17. Galtier-Dereure F, Boegner C, Bringer J. Obesity and pregnancy: complications and cost. *The American journal of clinical nutrition*. 2000;71(5):1242s-1248s.
18. Triunfo S, Lanzone A. Impact of overweight and obesity on obstetric outcomes. *J Endocrinol Invest*. 2014;37(4):323-329.
19. (NIPORT) NioPRaT, Associates Ma, International I. *Bangladesh Demographic and Health Survey 2011*. Dhaka 2013.
20. (BBS) BBoS. *Bangladesh Population and Housing Census 2011*. Dhaka: Government of the People's Republic of Bangladesh; 2012.
21. Barba C, Cavalli-Sforza T, Cutter J, Darnton-Hill I. Appropriate body-mass index for Asian populations and its implications for policy and intervention strategies. *The lancet*. 2004;363(9403):157.

- 1
  - 2
  - 3
  - 4
  - 5
  - 6
  - 7
  - 8
  - 9
  - 10
  - 11
  - 12
  - 13
  - 14
  - 15
  - 16
  - 17
  - 18
  - 19
  - 20
  - 21
  - 22
  - 23
  - 24
  - 25
  - 26
  - 27
  - 28
  - 29
  - 30
  - 31
  - 32
  - 33
  - 34
  - 35
  - 36
  - 37
  - 38
  - 39
  - 40
  - 41
  - 42
  - 43
  - 44
  - 45
  - 46
  - 47
  - 48
  - 49
  - 50
  - 51
  - 52
  - 53
  - 54
  - 55
  - 56
  - 57
  - 58
  - 59
  - 60
22. Clinical Guidelines on the Identification, Evaluation, and Treatment of Overweight and Obesity in Adults--The Evidence Report. National Institutes of Health. *Obes Res.* 1998;6 Suppl 2:51s-209s.
23. Flegal KM, Graubard BI, Williamson DF, Gail MH. Cause-specific excess deaths associated with underweight, overweight, and obesity. *Jama.* 2007;298(17):2028-2037.
24. Koblinsky M, Anwar I, Mridha MK, Chowdhury ME, Botlero R. Reducing maternal mortality and improving maternal health: Bangladesh and MDG 5. *Journal of Health, Population and Nutrition.* 2008;280-294.
25. Chowdhury AMR, Bhuiya A, Chowdhury ME, Rasheed S, Hussain Z, Chen LC. The Bangladesh paradox: exceptional health achievement despite economic poverty. *The Lancet.* 2013;382(9906):1734-1745.
26. Malik VS, Willett WC, Hu FB. Global obesity: trends, risk factors and policy implications. *Nature Reviews Endocrinology.* 2013;9(1):13-27.
27. Vlismas K, Stavrinou V, Panagiotakos DB. Socio-economic status, dietary habits and health-related outcomes in various parts of the world: a review. *Central European journal of public health.* 2009;17(2):55.
28. Subramanian SV, Perkins JM, Khan KT. Do burdens of underweight and overweight coexist among lower socioeconomic groups in India? *The American journal of clinical nutrition.* 2009;90(2):369-376.
29. Subramanian S, Kawachi I, Smith GD. Income inequality and the double burden of under- and overnutrition in India. *Journal of Epidemiology and Community Health.* 2007;61(9):802-809.
30. Haddad L, Alderman H, Appleton S, Song L, Yohannes Y. Reducing child malnutrition: How far does income growth take us? *The World Bank Economic Review.* 2003;17(1):107-131.
31. Planning Commission GoB. Unlocking the potential: national strategy for accelerated poverty reduction. In: Commission P, ed. Dhaka2005:320.
32. . BBoS. *Report of the household income and expenditure survey.* Dhaka: Bangladesh Bureau of Statistics . ;2005.
33. Martín AR, Nieto JMM, Ruiz JPN, Jiménez LE. Overweight and obesity: the role of education, employment and income in Spanish adults. *Appetite.* 2008;51(2):266-272.
34. Dinsa G, Goryakin Y, Fumagalli E, Suhrcke M. Obesity and socioeconomic status in developing countries: a systematic review. *Obesity reviews.* 2012;13(11):1067-1079.
35. Al-Ghamdi SH. The association between watching television and obesity in children of school-age in Saudi Arabia. *Journal of Family and Community Medicine.* 2013;20(2):83.
36. Deurenberg-Yap M, Chew S, Lin V, Tan B, Van Staveren W, Deurenberg P. Relationships between indices of obesity and its co-morbidities in multi-ethnic Singapore. *International journal of obesity.* 2001;25(10):1554.

## Tables

**Table 1.** Socio-demographic characteristics of the study participants by survey year, BDHS 1999-2014

| Variables                 | 1999         | 2004         | 2007         | 2011         | 2014          | p-value |
|---------------------------|--------------|--------------|--------------|--------------|---------------|---------|
| Age, mean(SD)             | 25.88 (6.63) | 30.56 (9.36) | 30.94 (9.3)  | 31.23 (9.22) | 31.37 (9.12)  | <0.001  |
| Age group, n (%)          |              |              |              |              |               | <0.001  |
| 15-24                     | 2148 (47.05) | 3303 (31.82) | 2996 (30.29) | 4557 (28.72) | 4433 (27.04)  |         |
| 25-34                     | 2007 (41.52) | 3533 (33.77) | 3344 (33.13) | 5603 (34.19) | 5969 (36.44)  |         |
| 35-44                     | 486 (10.61)  | 2598 (24.39) | 2747 (26.69) | 4321 (26.2)  | 4435 (26.05)  |         |
| 45+                       | 38 (0.81)    | 1055 (10.02) | 1040 (9.89)  | 1792 (10.89) | 1787 (10.47)  |         |
| Educational level, n (%)  |              |              |              |              |               | <0.001  |
| No education              | 2002 (44.62) | 4158 (42.44) | 3326 (34.85) | 4386 (28.59) | 4039 (25.68)  |         |
| Primary                   | 1364 (29.14) | 3070 (29.07) | 3014 (29.67) | 4857 (30.04) | 4875 (29.24)  |         |
| Secondary                 | 1072 (22.05) | 2629 (23.52) | 2983 (29.52) | 5731 (34.3)  | 6153 (36.76)  |         |
| Higher                    | 241 (4.19)   | 632 (4.97)   | 801 (5.96)   | 1299 (7.07)  | 1557 (8.32)   |         |
| Place of residence, n (%) |              |              |              |              |               | <0.001  |
| Urban                     | 1275 (17.76) | 3593 (22.58) | 3858 (22.81) | 5709 (26.1)  | 5764 (28.41)  |         |
| Rural                     | 3404 (82.24) | 6896 (77.42) | 6269 (77.19) | 11000 (73.9) | 11000 (71.59) |         |
| Geographic region, n (%)  |              |              |              |              |               | <0.001  |
| Barisal                   | 434 (6.48)   | 1252 (6.33)  | 1327 (6.01)  | 1819 (5.45)  | 1982 (6.19)   |         |
| Chittagong                | 937 (20.08)  | 1869 (17.56) | 1775 (18.23) | 2616 (18)    | 2639 (18.29)  |         |
| Dhaka                     | 1123 (31.05) | 2376 (31.27) | 2178 (31.5)  | 2795 (32.18) | 2893 (34.96)  |         |
| Khulna                    | 760 (11.42)  | 1583 (12.32) | 1589 (12.77) | 2488 (12.4)  | 2460 (10.51)  |         |
| Rajshahi                  | 889 (24.48)  | 2374 (26.35) | 1933 (25.31) | 4703 (26.73) | 4769 (23.56)  |         |
| Sylhet                    | 536 (6.49)   | 1035 (6.17)  | 1325 (6.18)  | 1852 (5.25)  | 1881 (6.49)   |         |
| Marital status, n (%)     |              |              |              |              |               | <0.001  |
| Not married               | 130 (2.71)   | 859 (7.93)   | 822 (7.7)    | 1091 (6.6)   | 1014 (5.95)   |         |
| Married                   | 4549 (97.29) | 9630 (92.07) | 9305 (92.3)  | 15000 (93.4) | 16000 (94.05) |         |
| <b>Urban</b>              |              |              |              |              |               |         |
| BMI, Kg/m <sup>2</sup>    |              |              |              |              |               | <0.001  |
| Mean (SD)                 | 20.78 (4.51) | 21.52 (5.06) | 22.24 (5.44) | 23 (4.87)    | 23.7 (5.06)   |         |
| BMI categories, n (%)     |              |              |              |              |               | <0.001  |
| Underweight               | 385 (29.74)  | 903 (24.84)  | 787 (19.54)  | 879 (13.46)  | 738 (12.21)   |         |
| Normal weight             | 585 (45.65)  | 1573 (44.47) | 1629 (41.73) | 2298 (41.4)  | 1996 (34.73)  |         |
| Overweight                | 237 (19.09)  | 801 (21.87)  | 1010 (26.88) | 1729 (30.62) | 1971 (33.74)  |         |
| Obese                     | 68 (5.53)    | 316 (8.81)   | 432 (11.85)  | 803 (14.52)  | 1059 (19.32)  |         |
| Overweight or obese       | 305 (24.61)  | 1117 (30.68) | 1442 (38.73) | 2532 (45.14) | 3030 (53.06)  |         |
| <b>Rural</b>              |              |              |              |              |               |         |
| BMI, Kg/m <sup>2</sup>    |              |              |              |              |               | <0.001  |
| Mean (SD)                 | 18.97 (2.42) | 19.76 (2.72) | 20.18 (2.83) | 20.82 (3.29) | 21.71 (3.62)  |         |
| BMI categories, n (%)     |              |              |              |              |               | <0.001  |
| Underweight               | 1636 (48.19) | 2581 (36.9)  | 2107 (32.45) | 2940 (27.83) | 2353 (21.09)  |         |
| Normal weight             | 1560 (45.76) | 3422 (49.82) | 3135 (50.72) | 5138 (48.59) | 4926 (45.3)   |         |
| Overweight                | 174 (5.03)   | 762 (11.36)  | 851 (13.88)  | 1997 (18.97) | 2780 (26.24)  |         |

**Table 1.** Socio-demographic characteristics of the study participants by survey year, BDHS 1999-2014

| Variables                         | 1999         | 2004         | 2007         | 2011          | 2014          | p-value |
|-----------------------------------|--------------|--------------|--------------|---------------|---------------|---------|
| Obese                             | 34 (1.02)    | 131 (1.92)   | 176 (2.96)   | 489 (4.62)    | 801 (7.38)    |         |
| Overweight or obese               | 208 (6.05)   | 893 (13.28)  | 1027 (16.83) | 2486 (23.58)  | 3581 (33.62)  |         |
| Wealth index, n (%)               |              |              |              |               |               | 0.1665  |
| Poorest                           | NA           | 1865 (19.85) | 1636 (19.19) | 2811 (18.29)  | 2999 (18.55)  |         |
| Poorer                            | NA           | 1880 (19.92) | 1822 (19.35) | 2995 (19.47)  | 3102 (18.95)  |         |
| Middle                            | NA           | 1960 (19.77) | 1910 (19.72) | 3129 (20.07)  | 3382 (20.04)  |         |
| Richer                            | NA           | 2098 (20.38) | 2043 (20.85) | 3472 (20.83)  | 3534 (21.21)  |         |
| Richest                           | NA           | 2686 (20.08) | 2716 (20.88) | 3866 (21.34)  | 3607 (21.24)  |         |
| Watch TV (once a week), n (%)     |              |              |              |               |               | <0.001  |
| No                                | 2946 (66.99) | 5459 (54.5)  | 5138 (53.2)  | 8149 (51.61)  | 7997 (48.83)  |         |
| Yes                               | 1732 (33.01) | 5027 (45.5)  | 4985 (46.8)  | 8120 (48.39)  | 8626 (51.17)  |         |
| Currently working, n (%)          |              |              |              |               |               |         |
| No                                | 3839 (81.19) | 8098 (76.85) | 7068 (67.12) | 14000 (86.62) | 11000 (65.85) |         |
| Yes                               | 840 (18.81)  | 2390 (23.15) | 3055 (32.88) | 2216 (13.38)  | 5398 (34.15)  |         |
| Number of living children, n (%)  |              |              |              |               |               | <0.001  |
| 0                                 | 67 (1.46)    | 1017 (9.39)  | 930 (8.78)   | 1371 (8.53)   | 1385 (7.96)   |         |
| 1-2                               | 2669 (56.66) | 4590 (43.15) | 4769 (47.11) | 8236 (50.09)  | 8857 (53.48)  |         |
| 3-4                               | 1358 (29.25) | 3312 (32.45) | 3111 (31.61) | 5102 (31.64)  | 5013 (30.45)  |         |
| >5                                | 585 (12.63)  | 1570 (15.01) | 1317 (12.5)  | 1564 (9.74)   | 1369 (8.11)   |         |
| Number of household member, n (%) |              |              |              |               |               | <0.001  |
| 1-2                               | 46 (1.03)    | 382 (3.71)   | 405 (4.11)   | 694 (4.46)    | 834 (5.27)    |         |
| 3-4                               | 1208 (26.22) | 3079 (30.31) | 3171 (32.63) | 5633 (34.65)  | 6224 (37.36)  |         |
| >5                                | 3425 (72.75) | 7028 (65.99) | 6551 (63.25) | 9946 (60.89)  | 9566 (57.36)  |         |
| Contraceptive use, n (%)          |              |              |              |               |               | <0.001  |
| Not using                         | 2060 (44.71) | 4422 (41.76) | 4555 (44.02) | 6260 (38.76)  | 6227 (37.19)  |         |
| Pills                             | 1352 (2.904) | 2641 (2.606) | 2734 (2.835) | 4385 (2.725)  | 4476 (2.717)  |         |
| Other                             | 1267 (26.25) | 3426 (32.18) | 2838 (27.63) | 5628 (33.99)  | 5921 (35.64)  |         |
| Husband education, n (%)          |              |              |              |               |               | <0.001  |
| No education                      | 1851 (42.48) | 3818 (39.16) | 3342 (35.92) | 4833 (31.73)  | 4764 (29.5)   |         |
| Primary                           | 1102 (24.24) | 2629 (25.34) | 2610 (25.78) | 4362 (26.89)  | 4503 (27.1)   |         |
| Secondary                         | 1098 (23.05) | 2691 (24.43) | 2660 (25.94) | 4680 (27.93)  | 4884 (29.71)  |         |
| Higher                            | 549 (10.23)  | 1342 (11.07) | 1501 (12.37) | 2390 (13.46)  | 2471 (13.69)  |         |

**Table 2.** Association of overweight and obesity with socio demographic characteristics by place of residence, BDHS 1999-2014

|                            | Urban                  |         |                   |         | Rural                  |         |                    |         |
|----------------------------|------------------------|---------|-------------------|---------|------------------------|---------|--------------------|---------|
|                            | Overweight vs. healthy |         | Obese vs. healthy |         | Overweight vs. healthy |         | Obese vs. healthy  |         |
| Age group                  | RR (95% CI)            | p-value | RR (95% CI)       | p-value | RR (95% CI)            | p-value | RR (95% CI)        | p-value |
| 15-24                      | Ref                    |         | Ref               |         | Ref                    |         | Ref                |         |
| 25-34                      | 2.39 (2.11, 2.70)      | 0.000   | 4.04 (3.34, 4.87) | 0.00    | 2.09 (1.9, 2.31)       | 0.000   | 3.23 (2.67, 3.91)  | 0.000   |
| 35-44                      | 3.14 (2.74, 3.59)      | 0.000   | 6.77 (5.56, 8.24) | 0.00    | 2.45 (2.2, 2.73)       | 0.000   | 4.06 (3.30, 4.99)  | 0.000   |
| 45+                        | 2.59 (2.15, 3.12)      | 0.000   | 6.22 (4.88, 7.92) | 0.00    | 2.47 (2.14, 2.86)      | 0.000   | 3.69 (2.87, 4.74)  | 0.000   |
| Education level            |                        |         |                   |         |                        |         |                    |         |
| No education               | Ref                    |         | Ref               |         | Ref                    |         | Ref                |         |
| Primary                    | 1.22 (1.06, 1.41)      | 0.006   | 1.25 (1.01, 1.54) | 0.03    | 1.11 (1.01, 1.23)      | 0.023   | 1.22 (1.02, 1.46)  | 0.026   |
| Secondary                  | 1.41 (1.20, 1.65)      | 0.000   | 1.61 (1.29, 2.02) | 0.00    | 1.15 (1.03, 1.30)      | 0.014   | 1.27 (1.04, 1.55)  | 0.019   |
| Higher                     | 1.61 (1.30, 1.99)      | 0.000   | 1.42 (1.07, 1.90) | 0.02    | 1.12 (0.92, 1.36)      | 0.238   | 0.92 (0.67, 1.27)  | 0.649   |
| Marital status             |                        |         |                   |         |                        |         |                    |         |
| Not married                | Ref                    |         |                   |         |                        |         |                    |         |
| Married                    | 1.27 (1.04, 1.56)      | 0.018   | 1.41 (1.07, 1.86) | 0.01    | NA                     | NA      | NA                 | NA      |
| Wealth index               |                        |         |                   |         |                        |         |                    |         |
| Poorest                    | Ref                    |         | Ref               |         | Ref                    |         | Ref                |         |
| Poorer                     | 1.15 (0.87, 1.52)      | 0.317   | 0.99 (0.58, 1.70) | 0.99    | 1.32 (1.17, 1.49)      | 0.000   | 1.45 (1.11, 1.90)  | 0.006   |
| Middle                     | 1.65 (1.29, 2.11)      | 0.000   | 1.63 (1.02, 2.61) | 0.04    | 1.65 (1.46, 1.87)      | 0.000   | 2.30 (1.78, 2.97)  | 0.000   |
| Richer                     | 1.88 (1.49, 2.37)      | 0.000   | 2.55 (1.64, 3.96) | 0.00    | 2.46 (2.16, 2.8)       | 0.000   | 3.94 (3.05, 5.10)  | 0.000   |
| Richest                    | 2.83 (2.24, 3.57)      | 0.000   | 5.58 (3.6, 8.63)  | 0.00    | 3.38 (2.9, 3.94)       | 0.000   | 7.88 (5.93, 10.46) | 0.000   |
| Watch TV (once a week)     |                        |         |                   |         |                        |         |                    |         |
| No                         | Ref                    |         | Ref               |         | Ref                    |         | Ref                |         |
| Yes                        | 1.28 (1.13, 1.45)      | 0.000   | 1.72 (1.43, 2.07) | 0.00    | 1.25 (1.15, 1.35)      | 0.000   | 1.4 (1.22, 1.62)   | 0.000   |
| Currently working          |                        |         |                   |         |                        |         |                    |         |
| No                         | Ref                    |         | Ref               |         |                        |         |                    |         |
| Yes                        | 0.79 (0.71, 0.89)      | 0.000   | 0.54 (0.46, 0.64) | 0.00    | NA                     | NA      | NA                 | NA      |
| Number of household member |                        |         |                   |         |                        |         |                    |         |
| 1-2                        |                        |         |                   |         | Ref                    |         | Ref                |         |
| 3-4                        | NA                     | NA      | NA                | NA      | 0.86 (0.72, 1.02)      | 0.093   | 0.86 (0.64, 1.16)  | 0.353   |
| >5                         | NA                     | NA      | NA                | NA      | 0.71 (0.60, 0.84)      | 0.000   | 0.61 (0.45, 0.81)  | 0.001   |
| Contraceptive use          |                        |         |                   |         |                        |         |                    |         |
| Not using                  | Ref                    |         |                   |         | Ref                    |         | Ref                |         |
| Pills                      | 0.96 (0.85, 1.09)      | 0.605   | 0.79 (0.67, 0.94) | 0.01    | 1.06 (0.98, 1.16)      | 0.130   | 0.83 (0.70, 0.97)  | 0.022   |
| Other                      | 1.07 (0.95, 1.20)      | 0.237   | 1.04 (0.9, 1.20)  | 0.55    | 1.08 (0.99, 1.18)      | 0.053   | 0.94 (0.82, 1.09)  | 0.459   |
| Husband education          |                        |         |                   |         |                        |         |                    |         |
| No education               | Ref                    |         | Ref               |         | Ref                    |         | Ref                |         |
| Primary                    | 1.11 (0.95, 1.29)      | 0.164   | 1.12 (0.89, 1.4)  | 0.32    | 1.07 (0.97, 1.18)      | 0.132   | 1.22 (1.01, 1.47)  | 0.037   |
| Secondary                  | 1.18 (1.01, 1.37)      | 0.031   | 1.32 (1.05, 1.65) | 0.02    | 1.2 (1.08, 1.34)       | 0.001   | 1.51 (1.25, 1.82)  | 0.000   |
| Higher                     | 1.55 (1.28, 1.88)      | 0.000   | 1.94 (1.49, 2.52) | 0.00    | 1.46 (1.25, 1.69)      | 0.000   | 1.98 (1.55, 2.53)  | 0.000   |
| Survey year                |                        |         |                   |         |                        |         |                    |         |
| 2004                       | Ref                    |         | Ref               |         | Ref                    |         | Ref                |         |
| 2007                       | 1.23 (1.07, 1.42)      | 0.003   | 1.35 (1.11, 1.64) | 0.00    | 1.19 (1.06, 1.35)      | 0.004   | 1.49 (1.15, 1.93)  | 0.002   |
| 2011                       | 1.43 (1.26, 1.63)      | 0.000   | 1.68 (1.40, 2.00) | 0.00    | 1.71 (1.54, 1.90)      | 0.000   | 2.50 (2.00, 3.13)  | 0.000   |
| 2014                       | 2.07 (1.81, 2.37)      | 0.000   | 3.23 (2.71, 3.86) | 0.00    | 2.60 (2.33, 2.89)      | 0.000   | 4.47 (3.59, 5.57)  | 0.000   |

### Figure legends

Figure 1. Kernel density plot of the distribution of BMI for reproductive-age women in 1999, 2004, 2007, 2011, and 2014

Figure 2. Prevalence of overweight and obesity by survey year, BDHS 1999-2014

Figure 3. Prevalence of underweight, normal, overweight, and obesity by year and place of residence BDHS 1999-2014

Figure S1. Prevalence of BMI categories International cutoff

Figure S2. Prevalence of underweight, normal, overweight, and obesity by year and place of residence BDHS 1999-2014 (International cutoff)



### List of Abbreviations

|      |                                          |
|------|------------------------------------------|
| ARR  | Adjusted risk ratio                      |
| BMI  | Body mass index                          |
| CI   | Confidence interval                      |
| CVD  | Cardiovascular diseases                  |
| WHO  | World Health Organization                |
| BDHS | Bangladesh Demographic and Health Survey |

### Ethical approval and consent

All BDHS surveys received ethical approval from ICF Macro Institutional Review Board, Maryland, USA and National Research Ethics Committee of Bangladesh Medical Research Council (BMRC), Dhaka, Bangladesh. Informed consent was obtained from each participant of the survey before enrolling in the survey by using the Introduction and Consent form of the survey. It was also explained that the information will be kept strictly confidential and will not be shared with anyone except members of the survey team.

**Consent to publish:** Not Applicable

### Availability of data/ Data sharing statement

The datasets used for the current study are publicly available from <http://dhsprogram.com/data/available-datasets.cfm>.

**Funding:** This research received no specific grant from any funding agency in the public, commercial or not-for-profit sectors

**Acknowledgement:** We gratefully acknowledge DHS for allowing us to use the data.

**Disclosure/ Conflict of interest:** None

**Author contribution:** MC conceptualized the study and designed the analytical approach, performed the data analyses and interpreted the findings, and led the writing of the article. MA was involved in the literature search and drafting the manuscript. ZH helped conceptualize the study literature, variable selection, editing and drafting the manuscript. Revised the manuscript critically for important intellectual content, and final approval of the version to be submitted. All authors helped write the manuscript. All authors read and approved the final manuscript.

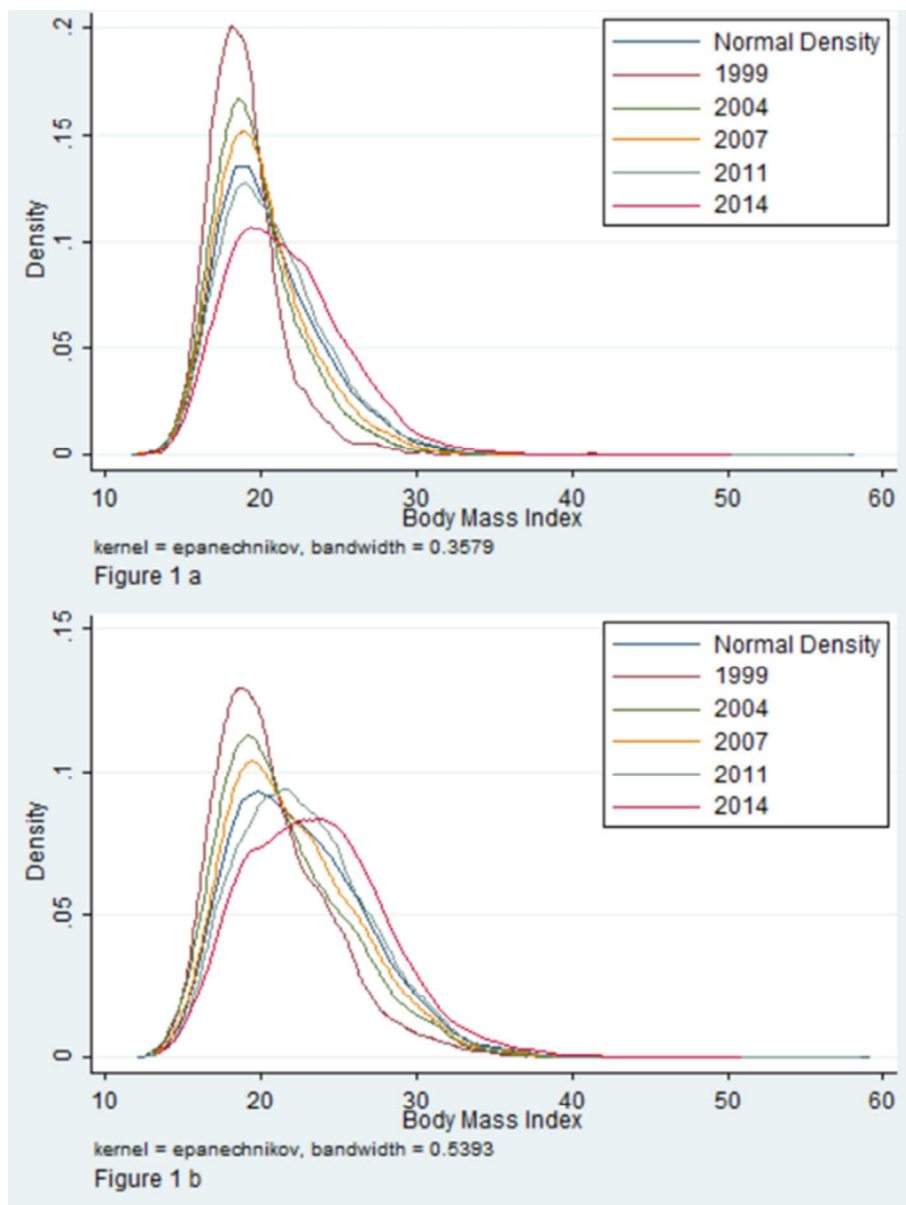

Figure 1. Kernel density plot of the distribution of BMI for reproductive-age women in 1999, 2004, 2007, 2011, and 2014

1  
2  
3  
4  
5  
6  
7  
8  
9  
10  
11  
12  
13  
14  
15  
16  
17  
18  
19  
20  
21  
22  
23  
24  
25  
26  
27  
28  
29  
30  
31  
32  
33  
34  
35  
36  
37  
38  
39  
40  
41  
42  
43  
44  
45  
46  
47  
48  
49  
50  
51  
52  
53  
54  
55  
56  
57  
58  
59  
60

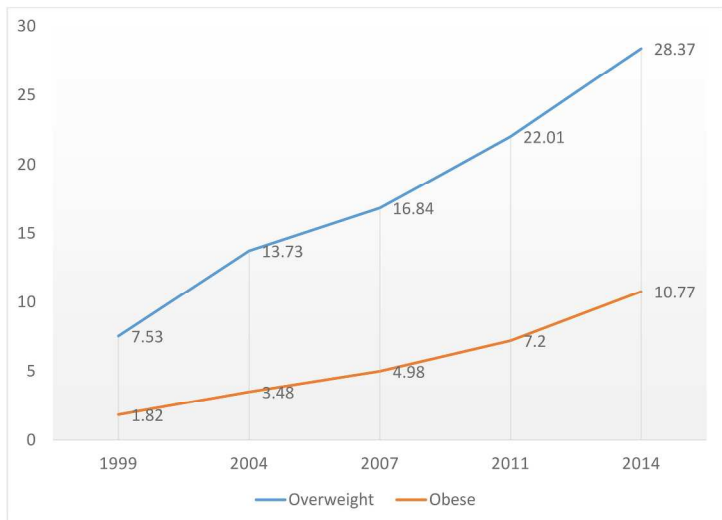

Figure 2. Prevalence of overweight and obesity by survey year, BDHS 1999-2014

Figure 2. Prevalence of overweight and obesity by survey year, BDHS 1999-2014

279x361mm (300 x 300 DPI)

Urban

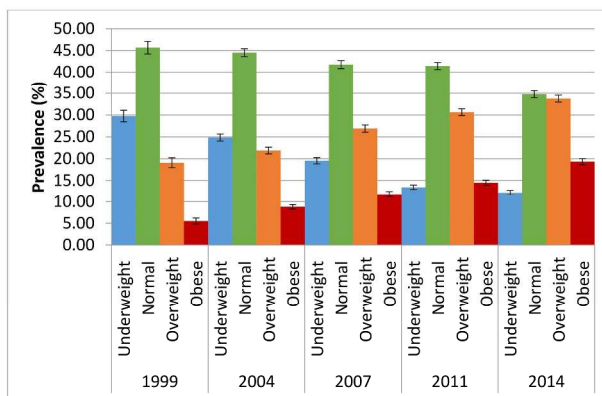

(a) Rural

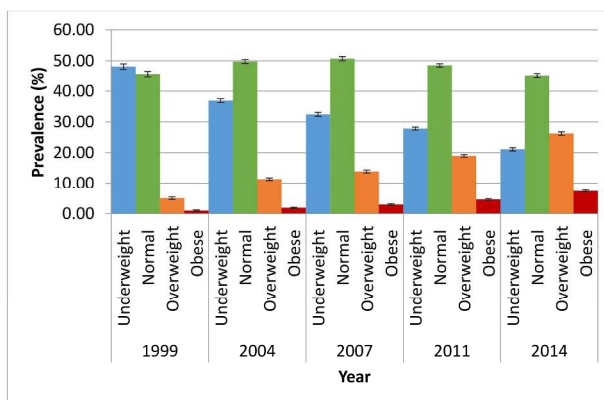

Figure 3. Prevalence of underweight, normal, overweight, and obesity by year and place of residence BDHS 1999-2014

Figure 3. Prevalence of underweight, normal, overweight, and obesity by year and place of residence BDHS 1999-2014

279x361mm (300 x 300 DPI)

**Supplements****Table S1.** Variance inflation (VIF) values of final models of urban and rural women, BDHS 1999-2014

| Variables                        | VIF- Urban | VIF-Rural |
|----------------------------------|------------|-----------|
| Age                              | 1.09       | 1.29      |
| Education                        | 2.03       | 1.97      |
| Marital status                   | 1.18       | 1.12      |
| Wealth index                     | 1.49       | 1.69      |
| Watching TV at least once a week | 1.29       | 1.32      |
| Currently working                | 1.08       | 1.04      |
| No. of household members         | 1.04       | 1.05      |
| Contraceptive use                | 1.12       | 1.09      |
| Husband education                | 2.03       | 1.71      |
| Survey year                      | 1.02       | 1.05      |

**Table S2.** Summary characteristics of the sample by survey year, BDHS 1999-2014

| Variable                        | 1999-00 | 2004  | 2007  | 2011  | 2014  |
|---------------------------------|---------|-------|-------|-------|-------|
| Initial sample of the survey, n | 10544   | 11440 | 10996 | 17842 | 17863 |
| BMI available, n                | 5055    | 11176 | 10836 | 17309 | 17683 |
| Pregnant women, n               | 376     | 678   | 709   | 1036  | 1059  |
| Final working sample, n         | 4679    | 10489 | 10127 | 16273 | 16624 |
| Response rate, %                | 96.9    | 98.6  | 98.4  | 97.9  | 97.9  |

For peer review only

**Table S3.** Prevalence of BMI categories of reproductive women by age and place of residence in Bangladesh, BDHS 1999 - 2014

|               |            | Urban                |                      |                      |                      |                      | Rural                |                      |                      |                      |                      |
|---------------|------------|----------------------|----------------------|----------------------|----------------------|----------------------|----------------------|----------------------|----------------------|----------------------|----------------------|
|               | Age groups | 1999                 | 2004                 | 2007                 | 2011                 | 2014                 | 1999                 | 2004                 | 2007                 | 2011                 | 2014                 |
| Underweight   | 15-24      | 32.75 (28.78, 36.98) | 30.81 (27.83, 33.97) | 27.4 (24.41, 30.61)  | 20.14 (17.89, 22.6)  | 20.99 (18.44, 23.79) | 48.38 (45.86, 50.92) | 38.91 (36.79, 41.08) | 33.95 (31.7, 36.26)  | 34.01 (32.2, 35.87)  | 27.45 (25.42, 29.58) |
|               | 25-34      | 27.16 (23.64, 31)    | 20.91 (18.54, 23.5)  | 17.35 (15.12, 19.83) | 11.23 (9.68, 13)     | 8.34 (6.98, 9.92)    | 45.07 (42.38, 47.79) | 34.26 (32.21, 36.37) | 29.2 (27.08, 31.41)  | 24.12 (22.65, 25.66) | 17.81 (16.16, 19.6)  |
|               | 35-44      | 28.42 (20.42, 38.06) | 21.4 (18.58, 24.51)  | 14.18 (12.04, 16.63) | 9.53 (7.94, 11.4)    | 9.37 (7.69, 11.38)   | 57.48 (52.25, 62.55) | 35.4 (32.99, 37.89)  | 32.94 (30.5, 35.48)  | 24.75 (23.05, 26.53) | 17.98 (16.13, 19.99) |
|               | 45+        | 35.89 (8.84, 76.36)  | 30.27 (25.06, 36.03) | 20.51 (16.36, 25.39) | 12.56 (9.83, 15.92)  | 10.61 (7.61, 14.61)  | 60.97 (42.57, 76.7)  | 42.56 (38.75, 46.46) | 37.24 (33.25, 41.42) | 30.41 (27.56, 33.42) | 23.58 (20.29, 27.22) |
|               | Overall    | 29.73 (27.21, 32.39) | 24.84 (23.32, 26.42) | 19.54 (18.17, 20.99) | 13.46 (12.45, 14.54) | 12.2 (11.16, 13.34)  | 48.18 (46.47, 49.91) | 36.89 (35.7, 38.11)  | 32.44 (31.2, 33.71)  | 27.82 (26.91, 28.76) | 21.08 (20.06, 22.15) |
| Normal weight | 15-24      | 50.62 (46.22, 55.01) | 53.21 (49.83, 56.56) | 50.64 (47.17, 54.11) | 53.98 (50.91, 57.02) | 45.47 (42.22, 48.77) | 47.42 (44.89, 49.95) | 53.54 (51.33, 55.74) | 55.29 (52.86, 57.69) | 52.08 (50.14, 54)    | 50.84 (48.49, 53.18) |
|               | 25-34      | 41.45 (37.43, 45.59) | 44.68 (41.65, 47.75) | 41.3 (38.23, 44.45)  | 37.8 (35.15, 40.51)  | 32.71 (30.19, 35.34) | 46.8 (44.08, 49.54)  | 51.15 (48.95, 53.35) | 51.6 (49.21, 53.98)  | 48.32 (46.57, 50.08) | 44.57 (42.49, 46.67) |
|               | 35-44      | 45.09 (35.42, 55.14) | 37.9 (34.44, 41.5)   | 35.36 (32.17, 38.68) | 34 (31.08, 37.05)    | 27.75 (24.94, 30.74) | 35.71 (30.86, 40.88) | 46.98 (44.42, 49.55) | 47.49 (44.83, 50.16) | 47.15 (45.16, 49.15) | 42.17 (39.77, 44.61) |
|               | 45+        | 19.96 (4.12, 59.13)  | 33.66 (28.29, 39.49) | 36.66 (31.3, 42.36)  | 37.87 (33.33, 42.63) | 32.15 (27.54, 37.14) | 35.62 (20.55, 54.2)  | 40.37 (36.59, 44.27) | 41.94 (37.8, 46.2)   | 43.56 (40.47, 46.71) | 41.06 (37.55, 44.66) |
|               | Overall    | 45.64 (42.81, 48.51) | 44.47 (42.65, 46.3)  | 41.72 (39.93, 43.53) | 41.39 (39.8, 43)     | 34.72 (33.15, 36.33) | 45.76 (44.03, 47.49) | 49.82 (48.55, 51.08) | 50.72 (49.36, 52.08) | 48.58 (47.56, 49.61) | 45.29 (44.05, 46.53) |
| Overweight    | 15-24      | 14.31 (11.51, 17.65) | 12.51 (10.46, 14.89) | 17.63 (15.1, 20.47)  | 20.18 (17.81, 22.79) | 25.42 (22.67, 28.38) | 3.36 (2.58, 4.37)    | 6.7 (5.67, 7.89)     | 9.56 (8.19, 11.14)   | 11.81 (10.63, 13.1)  | 17.95 (16.33, 19.7)  |
|               | 25-34      | 23.9 (20.55, 27.6)   | 25.73 (23.15, 28.49) | 28.99 (26.19, 31.96) | 35.56 (32.95, 38.26) | 37.7 (35.09, 40.38)  | 6.74 (5.49, 8.24)    | 12.09 (10.72, 13.6)  | 15.66 (14, 17.48)    | 22.03 (20.61, 23.52) | 29.31 (27.47, 31.23) |
|               | 35-44      | 15.79 (9.58, 24.92)  | 26.82 (23.77, 30.11) | 33.17 (30.02, 36.48) | 35.55 (32.57, 38.66) | 37.62 (34.59, 40.74) | 6.1 (4.06, 9.08)     | 15.05 (13.29, 17)    | 15.67 (13.83, 17.71) | 22.4 (20.78, 24.1)   | 30.09 (27.93, 32.34) |
|               | 45+        | 26.19 (3.91, 75.55)  | 23.39 (18.71, 28.83) | 27.28 (22.51, 32.65) | 30.3 (26.11, 34.84)  | 31.21 (26.62, 36.19) | 3.4 (0.47, 20.56)    | 15 (12.32, 18.14)    | 16.66 (13.73, 20.07) | 20.06 (17.69, 22.67) | 27.57 (23.99, 31.47) |
|               | Overall    | 19.08 (16.95, 21.42) | 21.87 (20.42, 23.39) | 26.87 (25.28, 28.53) | 30.62 (29.14, 32.14) | 33.74 (32.19, 35.32) | 5.02 (4.33, 5.83)    | 11.35 (10.57, 12.18) | 13.87 (12.96, 14.84) | 18.96 (18.18, 19.78) | 26.24 (25.17, 27.34) |
| Obese         | 15-24      | 2.3 (1.28, 4.1)      | 3.44 (2.4, 4.92)     | 4.31 (3.07, 6.02)    | 5.67 (4.44, 7.22)    | 8.09 (6.49, 10.05)   | 0.82 (0.46, 1.44)    | 0.83 (0.51, 1.35)    | 1.18 (0.75, 1.86)    | 2.08 (1.59, 2.71)    | 3.74 (3.01, 4.64)    |
|               | 25-34      | 7.47 (5.54, 10)      | 8.65 (7.03, 10.6)    | 12.33 (10.41, 14.55) | 15.39 (13.48, 17.52) | 21.23 (18.96, 23.69) | 1.37 (0.86, 2.18)    | 2.47 (1.86, 3.29)    | 3.52 (2.72, 4.55)    | 5.51 (4.76, 6.36)    | 8.28 (7.32, 9.36)    |
|               | 35-44      | 10.68 (5.53, 19.6)   | 13.86 (11.59, 16.48) | 17.26 (14.78, 20.07) | 20.9 (18.41, 23.62)  | 25.24 (22.51, 28.19) | 0.68 (0.17, 2.71)    | 2.56 (1.83, 3.56)    | 3.88 (2.99, 5.02)    | 5.68 (4.83, 6.66)    | 9.74 (8.53, 11.1)    |
|               | 45+        | 17.94 (2.42, 65.83)  | 12.66 (9.27, 17.07)  | 15.53 (11.73, 20.29) | 19.25 (15.73, 23.34) | 26.01 (21.83, 30.67) | NA                   | 2.05 (1.2, 3.49)     | 4.14 (2.69, 6.32)    | 5.94 (4.64, 7.58)    | 7.77 (6.2, 9.69)     |
|               | Overall    | 5.52 (4.32, 7.04)    | 8.81 (7.84, 9.88)    | 11.85 (10.71, 13.08) | 14.51 (13.41, 15.69) | 19.32 (18.01, 20.69) | 1.02 (0.72, 1.44)    | 1.92 (1.59, 2.31)    | 2.95 (2.52, 3.45)    | 4.61 (4.2, 5.06)     | 7.37 (6.82, 7.97)    |

**Table S4.** Prevalence of BMI categories of reproductive women by age and place of residence in Bangladesh, BDHS 1999 - 2014 (International cutoff)

|               | Urban                |                      |                      |                      |                      | Rural                |                      |                      |                      |                      |
|---------------|----------------------|----------------------|----------------------|----------------------|----------------------|----------------------|----------------------|----------------------|----------------------|----------------------|
|               | 1999                 | 2004                 | 2007                 | 2011                 | 2014                 | 1999-00              | 2004                 | 2007                 | 2011                 | 2014                 |
| Underweight   | 32.75 (28.78, 36.98) | 30.81 (27.83, 33.97) | 27.4 (24.41, 30.61)  | 20.14 (17.89, 22.6)  | 20.99 (18.44, 23.79) | 48.38 (45.86, 50.92) | 38.91 (36.79, 41.08) | 33.95 (31.7, 36.26)  | 34.01 (32.2, 35.87)  | 27.45 (25.42, 29.58) |
|               | 27.16 (23.64, 31)    | 20.91 (18.54, 23.5)  | 17.35 (15.12, 19.83) | 11.23 (9.68, 13)     | 8.34 (6.98, 9.92)    | 45.07 (42.38, 47.79) | 34.26 (32.21, 36.37) | 29.2 (27.08, 31.41)  | 24.12 (22.65, 25.66) | 17.81 (16.16, 19.6)  |
|               | 28.42 (20.42, 38.06) | 21.4 (18.58, 24.51)  | 14.18 (12.04, 16.63) | 9.53 (7.94, 11.4)    | 9.37 (7.69, 11.38)   | 57.48 (52.25, 62.55) | 35.4 (32.99, 37.89)  | 32.94 (30.5, 35.48)  | 24.75 (23.05, 26.53) | 17.98 (16.13, 19.99) |
|               | 35.89 (8.84, 76.36)  | 30.27 (25.06, 36.03) | 20.51 (16.36, 25.39) | 12.56 (9.83, 15.92)  | 10.61 (7.61, 14.61)  | 60.97 (42.57, 76.7)  | 42.56 (38.75, 46.46) | 37.24 (33.25, 41.42) | 30.41 (27.56, 33.42) | 23.58 (20.29, 27.22) |
|               | 29.73 (27.21, 32.39) | 24.84 (23.32, 26.42) | 19.54 (18.17, 20.99) | 13.46 (12.45, 14.54) | 12.2 (11.16, 13.34)  | 48.18 (46.47, 49.91) | 36.89 (35.7, 38.11)  | 32.44 (31.2, 33.71)  | 27.82 (26.91, 28.76) | 21.08 (20.06, 22.15) |
| Normal weight | 60.28 (55.93, 64.48) | 60.8 (57.48, 64.02)  | 62.4 (58.97, 65.72)  | 66.43 (63.53, 69.2)  | 59.81 (56.54, 62.98) | 49.84 (47.3, 52.37)  | 58.05 (55.85, 60.21) | 61.86 (59.48, 64.18) | 59.97 (58.06, 61.85) | 61.91 (59.64, 64.13) |
|               | 55.78 (51.59, 59.89) | 57.51 (54.44, 60.52) | 56.31 (53.15, 59.41) | 57.53 (54.77, 60.23) | 51.95 (49.19, 54.7)  | 51.45 (48.72, 54.17) | 59.71 (57.54, 61.85) | 60.19 (57.82, 62.51) | 61.03 (59.3, 62.73)  | 60.12 (58.05, 62.16) |
|               | 53.39 (43.32, 63.19) | 50.67 (47.04, 54.3)  | 52.6 (49.17, 56)     | 51.3 (48.14, 54.45)  | 44.95 (41.78, 48.16) | 39.23 (34.25, 44.44) | 56.17 (53.61, 58.7)  | 57.42 (54.77, 60.02) | 61.14 (59.16, 63.07) | 59.66 (57.26, 62.01) |
|               | 19.96 (4.12, 59.13)  | 43.23 (37.44, 49.21) | 50.28 (44.61, 55.94) | 52.82 (48.04, 57.55) | 45.45 (40.36, 50.64) | 35.62 (20.55, 54.2)  | 50.06 (46.14, 53.98) | 54.54 (50.29, 58.72) | 55.41 (52.25, 58.52) | 56.51 (52.71, 60.24) |
|               | 57.4 (54.54, 60.21)  | 55.43 (53.6, 57.24)  | 56.33 (54.52, 58.14) | 57.89 (56.29, 59.47) | 51.49 (49.82, 53.16) | 49.17 (47.44, 50.9)  | 57.33 (56.08, 58.57) | 59.43 (58.09, 60.75) | 60.14 (59.13, 61.15) | 60.11 (58.89, 61.32) |
| Overweight    | 5.82 (4.11, 8.17)    | 6.59 (5.15, 8.41)    | 8.67 (6.88, 10.86)   | 11.08 (9.32, 13.12)  | 15.63 (13.42, 18.13) | 1.28 (0.82, 2.01)    | 2.91 (2.25, 3.75)    | 3.82 (2.96, 4.91)    | 5.34 (4.55, 6.25)    | 9.52 (8.33, 10.87)   |
|               | 14.07 (11.39, 17.26) | 17.65 (15.41, 20.15) | 21.33 (18.84, 24.05) | 24.61 (22.29, 27.09) | 31.22 (28.7, 33.85)  | 2.95 (2.14, 4.05)    | 5 (4.13, 6.05)       | 9.64 (8.32, 11.15)   | 13.06 (11.92, 14.29) | 19.1 (17.61, 20.68)  |
|               | 13.61 (7.8, 22.66)   | 22.23 (19.39, 25.35) | 25.93 (23.03, 29.06) | 30.21 (27.36, 33.23) | 33.2 (30.3, 36.23)   | 3.28 (1.86, 5.7)     | 7.67 (6.37, 9.21)    | 8.91 (7.5, 10.55)    | 12.01 (10.77, 13.37) | 18.54 (16.79, 20.42) |
|               | 44.14 (12.09, 81.39) | 21.23 (16.77, 26.51) | 21.68 (17.25, 26.88) | 24.62 (20.76, 28.93) | 30.73 (26.28, 35.57) | 3.4 (0.47, 20.56)    | 6.38 (4.69, 8.62)    | 7.07 (5.22, 9.52)    | 11.55 (9.72, 13.67)  | 17.18 (14.72, 19.95) |
|               | 10.57 (8.92, 12.47)  | 15.87 (14.59, 17.23) | 19.18 (17.78, 20.66) | 22.25 (20.93, 23.63) | 27.56 (26.11, 29.06) | 2.19 (1.73, 2.77)    | 5.1 (4.57, 5.69)     | 7.39 (6.71, 8.13)    | 10.39 (9.79, 11.03)  | 16.14 (15.3, 17.02)  |
| Obese         | 1.13 (0.49, 2.59)    | 1.78 (1.05, 2.99)    | 1.51 (0.85, 2.66)    | 2.33 (1.58, 3.43)    | 3.55 (2.47, 5.07)    | 0.48 (0.23, 0.99)    | 0.12 (0.03, 0.39)    | 0.36 (0.15, 0.81)    | 0.66 (0.4, 1.08)     | 1.1 (0.75, 1.6)      |
|               | 2.97 (1.81, 4.84)    | 3.9 (2.85, 5.32)     | 4.99 (3.83, 6.49)    | 6.61 (5.34, 8.16)    | 8.48 (6.98, 10.25)   | 0.51 (0.22, 1.13)    | 1.01 (0.63, 1.59)    | 0.95 (0.55, 1.64)    | 1.77 (1.37, 2.29)    | 2.95 (2.37, 3.67)    |
|               | 4.56 (1.61, 12.27)   | 5.68 (4.25, 7.54)    | 7.27 (5.66, 9.28)    | 8.94 (7.26, 10.96)   | 12.46 (10.37, 14.9)  | .                    | 0.74 (0.4, 1.37)     | 0.72 (0.4, 1.29)     | 2.08 (1.59, 2.72)    | 3.81 (3.04, 4.76)    |
|               | .                    | 5.25 (3.2, 8.51)     | 7.51 (4.96, 11.21)   | 9.98 (7.38, 13.36)   | 13.18 (10.08, 17.06) | .                    | 0.99 (0.43, 2.26)    | 1.13 (0.49, 2.58)    | 2.61 (1.78, 3.81)    | 2.71 (1.88, 3.9)     |
|               | 2.28 (1.54, 3.38)    | 3.85 (3.21, 4.61)    | 4.93 (4.2, 5.78)     | 6.38 (5.63, 7.23)    | 8.72 (7.79, 9.76)    | 0.43 (0.25, 0.74)    | 0.65 (0.47, 0.9)     | 0.72 (0.52, 1.01)    | 1.62 (1.38, 1.9)     | 2.64 (2.31, 3.03)    |



Figure S1. Prevalence of BMI categories International cutoff

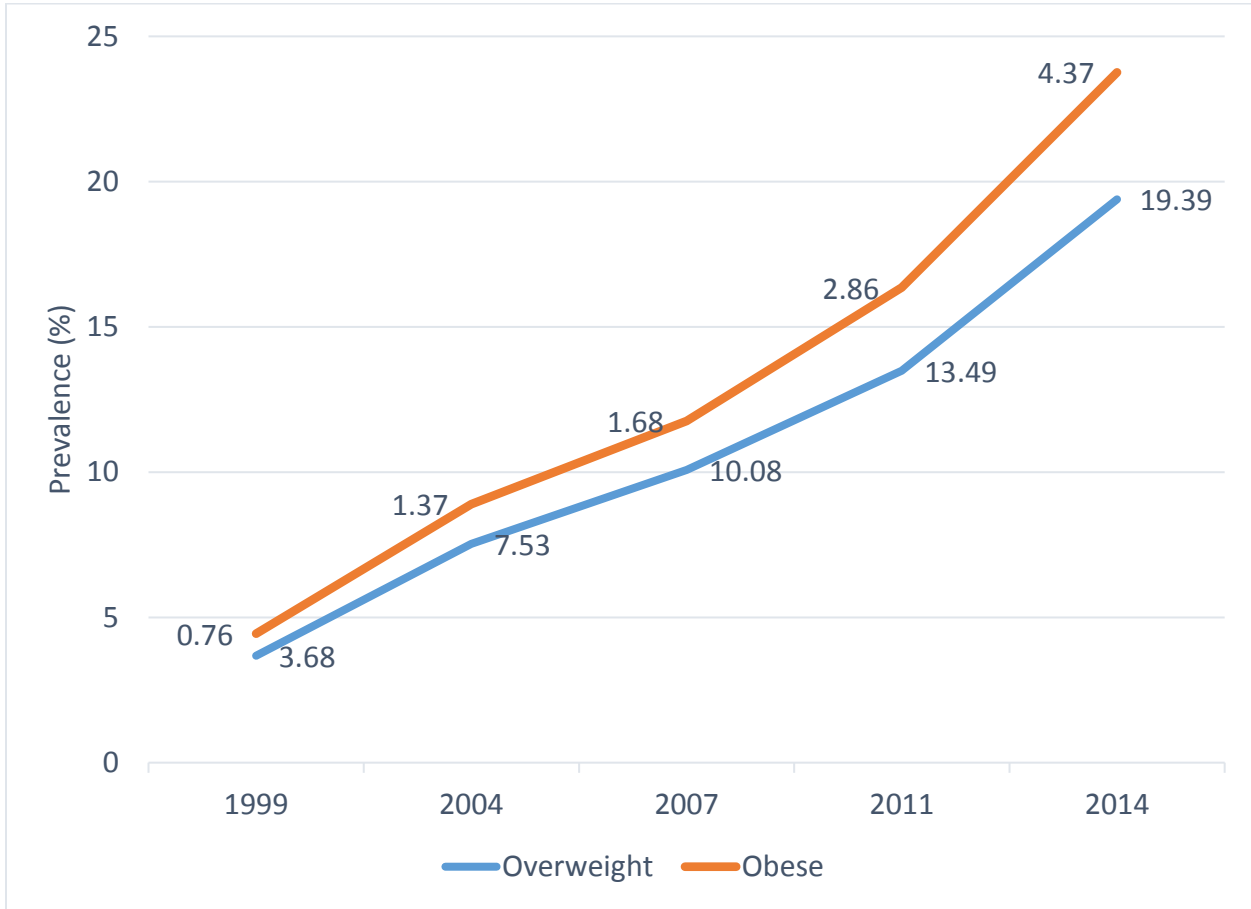

**Figure S2.** Prevalence of underweight, normal, overweight, and obesity by year and place of residence BDHS 1999-2014 (International cutoff).

(a) Urban

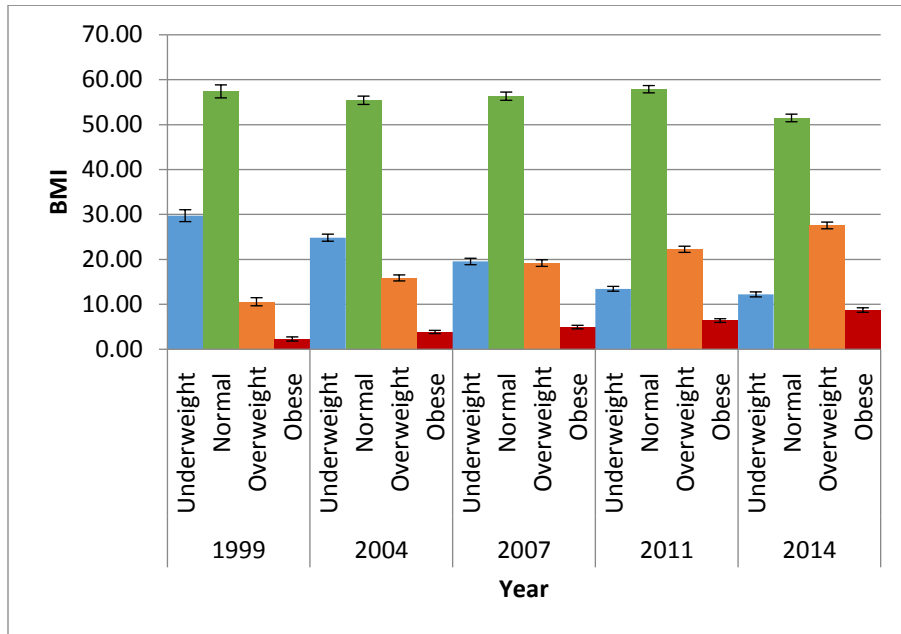

(b) Rural

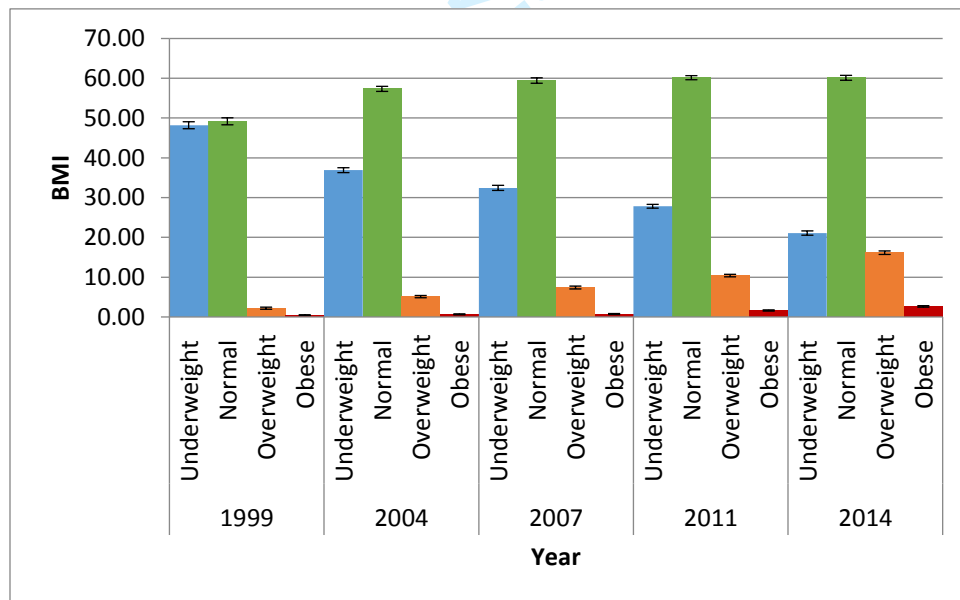

STROBE 2007 (v4) Statement—Checklist of items that should be included in reports of cross-sectional studies

| Section/Topic             | Item # | Recommendation                                                                                                                                                                       | Reported on page # |
|---------------------------|--------|--------------------------------------------------------------------------------------------------------------------------------------------------------------------------------------|--------------------|
| Title and abstract        | 1      | (a) Indicate the study’s design with a commonly used term in the title or the abstract                                                                                               | 2                  |
|                           |        | (b) Provide in the abstract an informative and balanced summary of what was done and what was found                                                                                  | 2                  |
| <b>Introduction</b>       |        |                                                                                                                                                                                      |                    |
| Background/rationale      | 2      | Explain the scientific background and rationale for the investigation being reported                                                                                                 | 4-6                |
| Objectives                | 3      | State specific objectives, including any prespecified hypotheses                                                                                                                     | 5 - 6              |
| <b>Methods</b>            |        |                                                                                                                                                                                      |                    |
| Study design              | 4      | Present key elements of study design early in the paper                                                                                                                              | 6                  |
| Setting                   | 5      | Describe the setting, locations, and relevant dates, including periods of recruitment, exposure, follow-up, and data collection                                                      | 6                  |
| Participants              | 6      | (a) Give the eligibility criteria, and the sources and methods of selection of participants                                                                                          | 6-7                |
| Variables                 | 7      | Clearly define all outcomes, exposures, predictors, potential confounders, and effect modifiers. Give diagnostic criteria, if applicable                                             | 7                  |
| Data sources/ measurement | 8*     | For each variable of interest, give sources of data and details of methods of assessment (measurement). Describe comparability of assessment methods if there is more than one group | Not applicable     |
| Bias                      | 9      | Describe any efforts to address potential sources of bias                                                                                                                            | Not applicable     |
| Study size                | 10     | Explain how the study size was arrived at                                                                                                                                            | 6                  |
| Quantitative variables    | 11     | Explain how quantitative variables were handled in the analyses. If applicable, describe which groupings were chosen and why                                                         | 8                  |
| Statistical methods       | 12     | (a) Describe all statistical methods, including those used to control for confounding                                                                                                | 8                  |
|                           |        | (b) Describe any methods used to examine subgroups and interactions                                                                                                                  | 8                  |
|                           |        | (c) Explain how missing data were addressed                                                                                                                                          | 6-8                |
|                           |        | (d) If applicable, describe analytical methods taking account of sampling strategy                                                                                                   | 8                  |

|                          |     |                                                                                                                                                                                                              |                |
|--------------------------|-----|--------------------------------------------------------------------------------------------------------------------------------------------------------------------------------------------------------------|----------------|
|                          |     | (e) Describe any sensitivity analyses                                                                                                                                                                        | 8              |
| <b>Results</b>           |     |                                                                                                                                                                                                              |                |
| Participants             | 13* | (a) Report numbers of individuals at each stage of study—eg numbers potentially eligible, examined for eligibility, confirmed eligible, included in the study, completing follow-up, and analysed            | 6-9            |
|                          |     | (b) Give reasons for non-participation at each stage                                                                                                                                                         | Not applicable |
|                          |     | (c) Consider use of a flow diagram                                                                                                                                                                           | Not applicable |
| Descriptive data         | 14* | (a) Give characteristics of study participants (eg demographic, clinical, social) and information on exposures and potential confounders                                                                     | 9              |
|                          |     | (b) Indicate number of participants with missing data for each variable of interest                                                                                                                          | Not applicable |
| Outcome data             | 15* | Report numbers of outcome events or summary measures                                                                                                                                                         | 9-10           |
| Main results             | 16  | (a) Give unadjusted estimates and, if applicable, confounder-adjusted estimates and their precision (eg, 95% confidence interval). Make clear which confounders were adjusted for and why they were included | 12-13          |
|                          |     | (b) Report category boundaries when continuous variables were categorized                                                                                                                                    | 7              |
|                          |     | (c) If relevant, consider translating estimates of relative risk into absolute risk for a meaningful time period                                                                                             | 11-12          |
| Other analyses           | 17  | Report other analyses done—eg analyses of subgroups and interactions, and sensitivity analyses                                                                                                               | 12             |
| <b>Discussion</b>        |     |                                                                                                                                                                                                              |                |
| Key results              | 18  | Summarise key results with reference to study objectives                                                                                                                                                     | 13             |
| Limitations              | 19  | Discuss limitations of the study, taking into account sources of potential bias or imprecision. Discuss both direction and magnitude of any potential bias                                                   | 14-16          |
| Interpretation           | 20  | Give a cautious overall interpretation of results considering objectives, limitations, multiplicity of analyses, results from similar studies, and other relevant evidence                                   | 3, 14-16       |
| Generalisability         | 21  | Discuss the generalisability (external validity) of the study results                                                                                                                                        | 14-16          |
| <b>Other information</b> |     |                                                                                                                                                                                                              |                |
| Funding                  | 22  | Give the source of funding and the role of the funders for the present study and, if applicable, for the original study on which the present article is based                                                | Not applicable |

\*Give information separately for cases and controls in case-control studies and, if applicable, for exposed and unexposed groups in cohort and cross-sectional studies.

**Note:** An Explanation and Elaboration article discusses each checklist item and gives methodological background and published examples of transparent reporting. The STROBE checklist is best used in conjunction with this article (freely available on the Web sites of PLoS Medicine at <http://www.plosmedicine.org/>, Annals of Internal Medicine at <http://www.annals.org/>, and Epidemiology at <http://www.epidem.com/>). Information on the STROBE Initiative is available at [www.strobe-statement.org](http://www.strobe-statement.org).

# BMJ Open

## Trends, prevalence, and risk factors in overweight and obesity among women of reproductive age in Bangladesh: a pooled analysis of five national cross-sectional surveys

|                                 |                                                                                                                                                                                                                                                                                   |
|---------------------------------|-----------------------------------------------------------------------------------------------------------------------------------------------------------------------------------------------------------------------------------------------------------------------------------|
| Journal:                        | <i>BMJ Open</i>                                                                                                                                                                                                                                                                   |
| Manuscript ID                   | bmjopen-2017-018468.R2                                                                                                                                                                                                                                                            |
| Article Type:                   | Research                                                                                                                                                                                                                                                                          |
| Date Submitted by the Author:   | 02-May-2018                                                                                                                                                                                                                                                                       |
| Complete List of Authors:       | Chowdhury, Muhammad Abdul Baker; University of Florida, Emergency Medicine<br>Adnan, Md. Mohiuddin; University of Mississippi Medical Center, Department of Data Science<br>Hassan, Md Zakiul; International Centre for Diarrhoeal Disease Research, Infectious Diseases Division |
| <b>Primary Subject Heading</b>: | Epidemiology                                                                                                                                                                                                                                                                      |
| Secondary Subject Heading:      | Epidemiology, Public health                                                                                                                                                                                                                                                       |
| Keywords:                       | obesity, reproductive women, body mass index, trends, risk factors                                                                                                                                                                                                                |
|                                 |                                                                                                                                                                                                                                                                                   |

SCHOLARONE™  
Manuscripts

1  
2  
3 **Trends, prevalence, and risk factors in overweight and obesity among women of**  
4 **reproductive age in Bangladesh: a pooled analysis of five national cross-sectional surveys**  
5  
6

7 Muhammad Abdul Baker Chowdhury<sup>\*,a</sup>, MPH, MPS, M.Sc.; Md. Mohiuddin Adnan<sup>b</sup>, M.Sc.; Zakiul Hassan<sup>c</sup>, MBBS  
8  
9  
10

11 **Author affiliation**

12  
13 <sup>a</sup> Clinical Biostatistician, Department of Emergency Medicine, College of Medicine, University of Florida,  
14 Gainesville, FL 32610, USA, Phone: 352.265.5911 (Ext: 31458)

15  
16 <sup>b</sup> Graduate Assistant, Department of Data Science, School of population Health,  
17 University of Mississippi Medical Center, Jackson, MS 39216, USA, phone: +1 (912) 541 -3572

18  
19 <sup>c</sup> Research Investigator, Programme for Emerging Infections, Infectious Diseases Division, International  
20 Centre for Diarrhoeal Disease Research (icddr, b), Bangladesh, Phone: +88 02 8860523- 32 (Extension:  
21 2547); Mobile: +8801753866573  
22  
23  
24  
25

26  
27 \* Corresponding author

28 **Author email address (s)**

29  
30 MC: [mchow023@fiu.edu](mailto:mchow023@fiu.edu)

31  
32 MA: [ma04541@georgiasouthern.edu](mailto:ma04541@georgiasouthern.edu)

33  
34 ZH: [zhassan@icddr.org](mailto:zhassan@icddr.org)  
35  
36  
37  
38  
39  
40  
41  
42  
43  
44  
45  
46  
47  
48  
49  
50  
51  
52  
53  
54  
55  
56  
57  
58  
59  
60

## Abstract

**Objective:** To determine the trends, prevalence, and risk factors of overweight and obesity among Bangladeshi women of reproductive-age from 1999-2014.

**Design:** We analyzed nationally representative data from the 1999, 2004, 2007, 2011, and 2014 cross-sectional Bangladesh Demographic and Health Surveys (BDHS).

**Setting:** Bangladesh.

**Participants:** Women aged 15- 49 years.

**Primary outcome:** Overweight/Obesity.

**Results:** A total of 58,192 women were included in the analysis. The prevalence of overweight and obesity among reproductive-age women increased significantly from 7.53% (95% CI: 6.83, 8.29) and 1.82% (CI: 1.48, 2.24) in 1999 to 28.37% (CI: 27.49, 29.28) and 10.77% (CI: 10.22, 11.35) in 2014, respectively. Age, education, wealth index, watching TV, and contraceptive use were associated with overweight and obesity in both urban and rural areas.

**Conclusions:** Overweight and obesity prevalence increased significantly among Bangladeshi women of reproductive-age between 1999 and 2014. Development of effective low-cost strategies to address the increasing burden of obesity should be a high priority.

**Keywords:** Body mass index (BMI), overweight, obesity, trends, BDHS, Bangladesh.

### Strengths and limitations of this study

- To our knowledge, this is the first study in Bangladesh to compare longitudinal (15 years) trends in the prevalence and risk factors associated with overweight/obesity in women using nationally representative data.
- The analysis accounted for a complex survey design (clustering, stratification, sample weights) which gives accurate estimates for the population. Importantly, survey year was used as a predictor which highlights incremental changes in overweight/ obesity over time.
- The surveys did not include responses on diet, fruit or vegetable intake, or physical activity, which are important predictors of overweight, and obesity. The surveys collected body mass index for reproductive-aged (15-49 years) women, therefore, the results may not be generalizable to women older than 49 years or men.



## Introduction

Obesity is a growing global public health concern<sup>1</sup>. An estimated two billion adults were reported to have overweight or obesity in 2014 with a worldwide prevalence of 39%<sup>1,2</sup>. Obesity increases the risk of many serious chronic health conditions such as hypertension, prediabetes, type 2 diabetes, dyslipidemia, cardiovascular diseases, certain cancers, and metabolic syndrome<sup>2-4</sup>. With a J-shaped (slight upward trend with a low BMI and steep increase with higher BMI) relationship between body mass index (BMI) and mortality, obesity is associated with a high risk of mortality<sup>5</sup>.

While the impact of the overweight and obesity epidemic in developed countries has been highlighted<sup>6</sup>, recent studies demonstrate that the prevalence of obesity has increased significantly in many developing countries<sup>7</sup>. This trend of increasing overweight and obesity will likely continue to rise in the developing world<sup>8</sup>. Bangladesh, a low-income country in South East Asia, has also observed an increasing prevalence of overweight and obesity. Like many developing countries, Bangladesh has experienced demographic and nutritional changes amongst the population such as changing lifestyle (e.g. high calorie food intake, sedentary life style) and urbanization. The rate of serious chronic health conditions in Bangladesh has increased steadily and death attributable to chronic conditions climbed from 8% in 1986 to 68% in 2006<sup>6</sup>. Traditionally, infectious diseases<sup>9</sup> and under-nutrition<sup>10</sup> were major public health problems in the country and little attention was focused on overweight and obesity by public health officials.

1  
2  
3 Data on the overweight and obesity trend in Bangladesh are sparse. Few studies that reported  
4 the prevalence of obesity were cross-sectional and data were limited to one year or less<sup>11</sup> and  
5 included only specific participants (e.g. diabetic patients, schoolchildren etc.)<sup>12</sup>. Further,  
6 sociodemographic trends associated with the rising incidence of overweight and obesity in  
7 Bangladesh has not been well studied. Further, the scale to determine BMI categories varied  
8 widely in prior studies and most used scales other than the World Health Organization (WHO)  
9 recommended Asian standard BMI classification.  
10  
11  
12  
13  
14  
15  
16  
17  
18  
19  
20  
21  
22

23 Reproductive-age women have higher rates of overweight and obesity and are more adversely  
24 affected by obesity-related complications than men<sup>13</sup>. This gender difference is mainly due to  
25 general weight gain during child bearing years, gestational weight gain and/or weight retention,  
26 adverse lifestyle, or risk factors associated with pregnancy and the postpartum period<sup>14</sup>.  
27  
28  
29

30 Maternal obesity increases the risk of numerous complications of pregnancy, labor, and birth  
31 for both mother and child, including diabetes and hypertensive disorders<sup>13,15</sup>. Compared with  
32 normal weight, maternal overweight is associated with a higher risk of cesarean delivery and a  
33 higher incidence of anesthetic and postoperative complications<sup>16,17</sup>. Low Apgar scores,  
34 macrosomia, and neural tube defects are also more frequent in infants of obese mothers  
35 compared with infants of normal-weight mothers<sup>16,17</sup>.  
36  
37  
38  
39  
40  
41  
42  
43  
44  
45  
46

47 Understanding the obesity trend and identifying modifiable sociodemographic factors  
48 responsible for overweight and obesity among this high-risk group may help inform the  
49 development of feasible public health interventions to reduce the burden of obesity and  
50 associated adverse health outcomes. We used nationally representative data from the  
51  
52  
53  
54  
55  
56  
57  
58  
59  
60

1  
2  
3 Bangladesh Demographic and Health Survey (BDHS) to estimate the trends in overweight and  
4  
5 obesity and to identify socio-demographic factors associated with overweight and obesity  
6  
7 among reproductive-age women in Bangladesh between 1999 and 2014.  
8  
9

## 10 **Methods**

### 11 *Data sources*

12  
13 We analyzed publicly available data from the 1999, 2004, 2007, 2011, and 2014 BDHS. The  
14  
15 BDHS is a nationally representative cross-sectional survey of the non-institutionalized  
16  
17 Bangladeshi population. It was developed over decades, progressively adopting standardized  
18  
19 demographic and health survey items designed to provide data for monitoring population  
20  
21 health in Bangladesh. The Bangladesh Ministry of Health and Family Welfare and the National  
22  
23 Institute of Population Research and Training (NIPORT) has been conducting the survey at  
24  
25 three year intervals since 1993<sup>18</sup>.  
26  
27  
28  
29  
30  
31

### 32 *Sampling design and sample size*

33  
34 All BDHS surveys use a two-stage stratified sampling procedure. In the first stage, enumeration  
35  
36 areas are selected with a probability proportional to population size. Population size is based on  
37  
38 the master sampling frame of the 2001 and 2011 population and housing census prepared by  
39  
40 the Bangladesh Bureau of Statistics<sup>19</sup>. In the second stage, systematic household sampling is  
41  
42 conducted from each sampling unit to provide a statistically reliable estimate of key  
43  
44 demographic and health-related variables. The details of the BDHS methods are available  
45  
46 elsewhere<sup>18</sup>. The surveys include 10544, 11440, 10996, 17842, and 17863 women, from the  
47  
48 1999, 2004, 2007, 2011, and 2014 surveys, respectively. We excluded participants below 15  
49  
50 years of age, participants with missing values for measured height and weight, and women who  
51  
52  
53  
54  
55  
56  
57  
58  
59  
60

1  
2  
3 were pregnant at the time of the survey. After applying exclusion criteria, the total sample  
4  
5 consisted of 58,192 women.  
6

### 7 8 *Outcome* 9

10 The primary outcome variable of this study was BMI calculated as weight in kilograms divided  
11  
12 by height in meters squared. In the analysis, we used BMI classifications recommended by WHO  
13  
14 for Asian population: normal weight (18.5 to <23.0), moderate risk or overweight (23.0 to  
15  
16 <27.5), and high risk or obese ( $\geq 27.5$ )<sup>20</sup>. We also conducted analyses using WHO and National  
17  
18 Institutes of Health BMI classification for the general population: underweight (<18.5), normal  
19  
20 weight (18.5 to <25.0), overweight (25.0 to <30.0), and obese ( $\geq 30.0$ )<sup>21</sup>.  
21  
22  
23  
24

### 25 *Covariates* 26

27 We choose covariates associated with overweight and obesity based on literature review<sup>11,22</sup>.  
28  
29 Socio-demographic characteristics included age (15-24, 25-34, 35-44, and 45+), marital status  
30  
31 (married, not married), education (no education, primary, secondary, and higher), place of  
32  
33 residence (rural, urban), geographic region (south (Barishal), southeast (Chittagong), central  
34  
35 (Dhaka), west (Khulna), mid-western (Rajshahi), northwest (Rangpur), and east (Sylhet)), wealth  
36  
37 index (poorest, poorer, middle, rich, and richest), employment status (yes, no), watching TV at  
38  
39 least once a week (yes or no), number of living children (0, 1-2, 3-4, and  $\geq 5$ ), number of  
40  
41 household members (1-2, 3-4, and  $\geq 5$ ), contraceptive use (not using any method, using pill,  
42  
43 and other methods), and survey year. Survey year was treated as a categorical variable. The  
44  
45 BDHS surveys provide a household wealth index estimated using multiple household and asset  
46  
47 variables. Principle component analysis was used for the estimation. The household level  
48  
49 variables include having electricity, type and source of drinking water, access to a sanitation  
50  
51  
52  
53  
54  
55  
56  
57  
58  
59  
60

1  
2  
3 facility, availability of cooking fuel, main roof material, main wall material and floor material.

4  
5 The asset variables are having wardrobe, table, chair or bench, watch or clock, radio, television,  
6  
7  
8 bicycle, motorcycle, sewing machine, telephone, and land ownership.  
9

### 10 11 *Statistical analysis*

12  
13 Descriptive statistics (e.g. mean, frequencies) were calculated to define the characteristics of  
14  
15 survey participants. All five surveys were appended given that a similar survey protocol in terms  
16  
17 of design, scope, coverage, sampling, data collection, coding, and weighting was used across  
18  
19 surveys. This approach simplified reporting estimates and improved statistical power of the  
20  
21 analyses. The distributions of BMI at each survey year were compared between rural and urban  
22  
23 populations using kernel density plots. The BMI trend over the 15-year period was assessed by  
24  
25 linear regression with survey year as primary predictor. The nature, strength, and direction of  
26  
27 the association between women's' socio-demographic characteristics and BMI categories was  
28  
29 assessed using multinomial logistic regression models with adjusted risk ratios (ARR) and 95%  
30  
31 confidence intervals (CI) for urban and rural study participants separately. All analysis was  
32  
33 performed using the statistical software, StataMP13.0 version (StataCorp LP, College Station,  
34  
35 TX). We used the "svy" procedures to adjust for the sample stratification and clustering effect in  
36  
37 all further analyses at the time of each survey. We used forward, backward, and stepwise  
38  
39 model selection procedures to select the best predicting model. Variance inflation factor was  
40  
41 calculated to check the collinearity of the predictor variables and the outcome for both urban  
42  
43 and rural sample (**Table S1**).  
44  
45  
46  
47  
48  
49  
50  
51  
52  
53  
54  
55  
56  
57  
58  
59  
60

### *Patient and Public Involvement*

The BDHS questionnaires were based on the MEASURE DHS model questionnaires. These model questionnaires were adapted for use in Bangladesh during a series of meetings with a technical working group (TWG) that consisted of representatives from NIPORT, Mitra and Associates, International Centre for Diarrheal Diseases and Control, Bangladesh (icddr, b), USAID/Bangladesh, and MEASURE DHS. Patients were not directly involved in the study. However, the TWG involved representatives from the government, non-government, ministry of health and family welfare representatives and donor organizations. All of these groups were involved in the study design and questionnaire development. The results will be used by the health researchers and policy makers of the country.

### *Ethical approval*

All BDHS surveys received ethical approval from ICF Macro Institutional Review Board, Maryland, USA and National Research Ethics Committee of Bangladesh Medical Research Council, Dhaka, Bangladesh.

## **Results**

### *Socio-demographic characteristics*

A total of 68,685 women participated across the five surveys. BMI data was available for 62,059 study participants and the survey response rates ranged between 96.9% and 98.6% from 1999 to 2014 (**Table S2**). We examined the changes in the shape of BMI distributions among Bangladeshi women of reproductive-age in 1999, 2004, 2007, 2011, and 2014 using Kernel density plot by urban and rural areas (**Figure 1**). Both urban and rural BMI distribution curves appear to be skewed to the right over the 15-year period indicating a gradual increase in BMI.

**Table 1** shows the socioeconomic and demographic characteristics of study participants across survey years. Over time, the mean age of study participants increased from 25 ( $\pm 6.63$ ) to 32 ( $\pm 9.12$ ) years. There was a significant reduction in the proportion of women with no education from 45% to 26% ( $p < 0.001$ ) between 1999 and 2014. Similarly, the proportion of women with higher education increased almost two-fold (4.19% to 8.32%). The frequency of watching television increased approximately 1.6 times and the proportion of working-women almost doubled (18.81 vs. 34.15%) over the study period. There was a significant change in the family structure during the study period. Five or more living children per women dropped from 12.63% to 8.11%.

#### *Trends in overweight and obesity*

We present trends in overweight and obesity prevalence over the study period in **Figure 2**. The overall prevalence of overweight-increased almost four fold (7.53% to 28.37%) and prevalence of obesity increased almost five-fold (1.82% to 10.77%) over the fifteen-year period. **Figure 3** demonstrates the prevalence of BMI categories by place of residence. There was a 1.76 and 3.5-fold increase in overweight, 5.12 and 7.23-fold increase in obesity in the prevalence of overweight and obesity in urban and rural areas, respectively (**Figure 3**).

#### *Prevalence of overweight and obesity*

**Table S3** shows the overall prevalence of BMI categories by age groups and place of residence. The prevalence of individuals with overweight and obesity increased across the five survey years for women residing in both urban and rural areas across all age groups. The prevalence of underweight and normal weight decreased in both rural and urban areas. Based on the Asian

1  
2  
3 BMI cutoffs, the overall prevalence of overweight in rural and urban women increased from  
4  
5 19.08% (95% CI: 16.95, 21.42) and 5.02% (95% CI: 4.33, 5.83) in 1999 to 33.74% (95% CI: 32.19,  
6  
7 35.32) and 26.24% (95% CI: 25.17, 27.34) in 2014, respectively. Similarly, the prevalence of  
8  
9 obesity increased from 5.52% (95% CI: 4.32, 7.04) and 1.02% (95% CI: 0.72, 1.44) in 1999 to  
10  
11 19.32% (95% CI: 18.01, 20.69) and 7.37% (95% CI: 6.82, 7.97) in 2014 in urban and rural areas,  
12  
13 respectively. The steepest increase of overweight was observed among women age 35-44 years  
14  
15 from 15.79% and 6.10 % in 1999 to 37.62% and 30.09% in 2014 in urban and rural areas,  
16  
17 respectively. The prevalence of obesity increased almost three fold among women aged 25-34  
18  
19 years from 7.47% and 1.37% in 1999 to 21.23% and 8.28% in 2014 in urban and rural areas,  
20  
21 respectively. The prevalence estimates of BMI for urban and rural women differed when the  
22  
23 international BMI cutoffs were used (**Table S4**). A sharp decline was also observed in  
24  
25 underweight (urban- 29.73% to 12.2%; rural- 48.18% to 21.08%) during 1999 to 2014 applying  
26  
27 the international BMI standard. Across urban and rural and all survey years, the prevalence of  
28  
29 overweight and obesity using the Asian-specific guidelines was 2.10 to 2.5 times higher than  
30  
31 prevalence estimates based on the international guidelines (**Figure S1, S2**).

#### 40 *Risk factors of overweight or obesity*

41  
42 The adjusted association of overweight and obesity is presented in **Table 2**. Overall, the risk  
43  
44 factors of overweight and obesity differed between urban and rural women. Increasing age was  
45  
46 associated with higher overweight and obesity risk among both rural and urban residents  
47  
48 though the association was stronger among urban residents. The highest overweight (ARR:  
49  
50 3.14, 95% CI: 2.74, 3.59) and obesity (ARR: 6.77, 95% CI: 5.56, 8.24) risk were for the urban  
51  
52 women in the age group 35-44 years compared to women 15-24 years of age. The risk of  
53  
54  
55  
56  
57  
58  
59  
60



1  
2  
3 overweight and obesity were high for urban women with higher educational level, married  
4 women, and women whose husband had a higher educational level. In terms of wealth index,  
5  
6 there was significant risk variation between urban and rural study participants. The middle,  
7  
8 richer, and richest rural women had of 1.63, 2.55, and 5.85 higher odds of being overweight  
9  
10 compared to the women in the lowest wealth index group. The odds of being obese was 2.30,  
11  
12 3.94, and 7.88 times higher for middle, richer, and richest rural women, respectively. Married  
13  
14 women in urban areas had a 27% (ARR: 1.27, 95% CI: 1.04, 1.56) higher risk of overweight and  
15  
16 41 % (ARR: 1.41, 95% CI: 1.07, 1.86) higher obesity risk compared with unmarried women.  
17  
18 Marital status was not significantly associated with overweight or obesity in rural women.  
19  
20  
21 Watching TV at least once a week was an independent risk factor for overweight and obesity  
22  
23 among both urban and rural women and the risk was stronger among urban women. In the  
24  
25 adjusted model, women who watched TV at least once a week had 28% (ARR: 1.28, 95% CI:  
26  
27 1.13, 1.45) and 72% (ARR: 1.72, 95% CI: 1.43, 2.07) higher risk of being overweight and obese,  
28  
29 respectively compared with women who do not watch TV at least once a week.  
30  
31  
32 Women's employment status was only associated with overweight or obesity for urban  
33  
34 residents. Working urban women had a lower probability of being overweight (ARR: 0.79, 95%  
35  
36 CI: 0.71, 0.89) or obese (ARR: 0.54, 95% CI: 0.46, 0.64) compared with those who do not  
37  
38 work. Women in rural areas with five or more household members had a lower probability of  
39  
40 being overweight (ARR: 0.71, 95% CI: 0.60, 0.84) and obese (ARR: 0.61, 95% CI: 0.45, 0.81)  
41  
42 compared with women with two or fewer household members. Compared to the 2004 survey,  
43  
44 the risk of being overweight significantly increased with each subsequent survey period in  
45  
46 urban and rural areas. For the increase of one survey period, the risk of overweight and obesity  
47  
48  
49  
50  
51  
52  
53  
54  
55  
56  
57  
58  
59  
60

1  
2  
3 was much stronger in rural areas compared with urban areas after adjusting for all predictors.  
4  
5 For example, in the most recent 2014 survey, the odds of being overweight was 2.60 (95% CI:  
6  
7 2.33, 2.89) and 2.07 (95% CI: 1.18, 2.37) times higher among rural and urban women  
8  
9 respectively as compared to 2004 survey year. Similarly, the odds of being obese were and 4.47  
10  
11 (95% CI: 3.59, 5.57) 3.23 (95% CI: 2.71, 3.86) times higher for rural and urban women  
12  
13 respectively as of 2004 survey year.  
14  
15  
16  
17

## 18 Discussion

19  
20 We identified an increasing trend of overweight and obesity among Bangladeshi reproductive-  
21  
22 age women with a five-fold increase of obesity between 1999 and 2014. Overweight and  
23  
24 obesity put women at increased risk of many adverse health outcomes, including cardiovascular  
25  
26 disease, diabetes, kidney disease, and obesity-related cancers<sup>3,4,23</sup>. These women are also more  
27  
28 likely to develop pregnancy complications, such as gestational diabetes, hypertensive disorders  
29  
30 of pregnancy, cesarean section delivery and adverse fetal outcome<sup>13,15</sup>. Although Bangladesh  
31  
32 has made substantial progress in reducing death from pregnancy-related complications in the  
33  
34 last several decades, pregnancy-associated risks remain high. The increasing trend of obesity  
35  
36 among reproductive-age women may create new challenges<sup>24,25</sup>.  
37  
38  
39  
40  
41

42 Our findings of an increasing longitudinal prevalence of overweight and obesity is consistent  
43  
44 with findings from neighboring countries, current trends in most developing countries, as well  
45  
46 as across the globe<sup>2</sup>. This trend could be explained by substantial lifestyle changes including  
47  
48 changes in eating habits with more energy-dense food intake and sedentary lifestyles with  
49  
50 reduced physical activity patterns<sup>26</sup>. These changes have been observed in Bangladesh with  
51  
52 rapid economic growth, urbanization, modernization, and globalization of the food market<sup>27</sup>.  
53  
54  
55  
56  
57  
58  
59  
60

1  
2  
3  
4  
5  
6 We found the highest increase in the prevalence of overweight and obesity among women  
7  
8 aged 35-44 years. Studies from other low-income countries showed that older women (aged  
9  
10 45-49) are at greatest risk of overweight and obesity<sup>28</sup>. Because we did not include women  
11  
12 older than 49 years of age, the actual number of obese women might be much higher in  
13  
14 Bangladesh. Our study also showed that the increasing rate of overweight and obesity was  
15  
16 more marked in rural areas than urban areas whereas the rate of decline of undernutrition was  
17  
18 much higher in urban areas. This disparity may be the result of multiple factors. Our study also  
19  
20 showed that the increasing overweight and obesity rates were more marked in rural areas than  
21  
22 urban areas and the decline of the undernutrition rate was much higher in urban areas. This  
23  
24 disparity between rural and urban areas may be the result of multiple factors, such as a  
25  
26 reduction in poverty and increased per-capita income. Bangladesh's per capita income has been  
27  
28 growing around 5% per year in the 2000s. This increased per-capita income at household level  
29  
30 has improved nutritional status. However, this growth was not equal among the rich and poor.  
31  
32 The upward trend of income inequality also exists at all levels: national, rural and urban. The  
33  
34 Gini coefficient, a commonly used measure for income inequality, shows an increase from  
35  
36 0.432 in 1995 to 0.458 in 2010. Moreover, urban inequality has increased faster than rural  
37  
38 inequality likely explaining the slow reduction of the number of underweight women in urban  
39  
40 areas.  
41  
42  
43  
44  
45  
46  
47  
48  
49

50 Our data showed that over the last 15 years, the number of educated and employed urban  
51  
52 women increased significantly in Bangladesh. Because educational status and employment are  
53  
54  
55  
56  
57  
58  
59  
60

1  
2  
3 both negatively associated with obesity, this might explain the variation in overweight and  
4  
5 obesity between urban and rural women<sup>29</sup>.  
6  
7

8  
9 We determined that educational status including the husband's educational status, marital  
10  
11 status, wealth index, self-reported hours of television watching, and employment status were  
12  
13 significantly associated with overweight and obesity. Our study showed that compared with  
14  
15 women who have no education women with higher educational status were at increased risk of  
16  
17 overweight and obesity. Highly educated women are more likely to have a sedentary job  
18  
19 requiring less physical activity and hence have an increased risk of weight gain. Studies from  
20  
21 other developing countries also demonstrate a positive association between level of education  
22  
23 and obesity<sup>22,30</sup>, however, a negative association between the two variables has been observed  
24  
25 primarily in developed countries<sup>29</sup>. Our findings that wealthier women are more likely to be  
26  
27 overweight or obese are consistent with studies done in other low and middle-income  
28  
29 countries<sup>22,31</sup>. This is likely due to the fact that increasing wealth in lower income countries  
30  
31 results in greater access to food, an escape from physical labor and a higher risk of obesity.  
32  
33 We found that television watching was an independent predictor of overweight and obesity.  
34  
35 Television viewing has been used as a proxy for sitting time and studies that follow participants  
36  
37 over long periods of time have consistently found that people who spend more time watching  
38  
39 television are more likely to gain weight<sup>32</sup>. Unemployed Bangladeshi women spend a significant  
40  
41 amount of time watching television as a leisure activity. Moreover, with the economic growth  
42  
43 increasing access to television suggest that viewing television may further increase which may  
44  
45 further contribute obesity of this group.  
46  
47  
48  
49  
50  
51  
52  
53  
54  
55  
56  
57  
58  
59  
60

1  
2  
3 Because geographical, ethnic, and cultural variation have large impacts on trends of overweight  
4 and obesity, we used the Asian BMI standard instead of international guidelines. The  
5  
6 prevalence estimate of overweight and obesity using the Asian BMI category across all survey  
7  
8 years was 2.10 to 2.50 times higher compared with estimates based on the international  
9  
10 guidelines. Evidence have shown that Asian populations are at an increased risk of cardio-  
11  
12 metabolic disorders at lower BMI levels than other ethnic groups, attributed to a considerably  
13  
14 higher body fat percentage<sup>33</sup>. For this reason, in 2004 the WHO recommended lowering the  
15  
16 BMI cut-offs for Asian adults for overweight from 25 to 23 kg/m<sup>2</sup> and for obesity from 30 to  
17  
18 27.5 kg/m<sup>2</sup> <sup>20</sup>. Previous reports that used international BMI classification in estimating  
19  
20 overweight and obesity prevalence in Asians may have underestimated adverse health risks.  
21  
22 Our analysis has several limitations. We used secondary cross-sectional data limiting our ability  
23  
24 to identify a causal relationship between predictors and overweight and obesity. Moreover, the  
25  
26 dataset lacks some key variables including eating habits, physical activity, and smoking.  
27  
28 Evidence showed that these factors strongly influence weight gain and may interact with other  
29  
30 predictors of obesity such as wealth and education. However, the study included representative  
31  
32 sample across Bangladesh including both urban and rural women and used the Asian BMI  
33  
34 category for the analysis strengthening our evidence base.  
35  
36  
37  
38  
39  
40  
41  
42  
43

## 44 **Conclusion**

45  
46  
47 Overweight and obesity increased among Bangladeshi reproductive-age women between 1999  
48  
49 and 2014. Sociodemographic factors including age, education, wealth index, marital status,  
50  
51 television watching, and employment status were associated with the increased trend of  
52  
53 overweight and obesity. The prevalence and risk factors of overweight and obesity varied  
54  
55  
56  
57  
58  
59  
60

1  
2  
3 between urban and rural women. Further research should focus on identifying other behavioral  
4  
5 risk factors associated with overweight and obesity and identify feasible interventions for those  
6  
7 most at risk.  
8  
9  
10  
11  
12  
13  
14  
15  
16  
17  
18  
19  
20  
21  
22  
23  
24  
25  
26  
27  
28  
29  
30  
31  
32  
33  
34  
35  
36  
37  
38  
39  
40  
41  
42  
43  
44  
45  
46  
47  
48  
49  
50  
51  
52  
53  
54  
55  
56  
57  
58  
59  
60

## References

1. Organization WH. Obesity and overweight. 2016; <http://www.who.int/mediacentre/factsheets/fs311/en/>. Accessed March 24, 2017.
2. Ng M, Fleming T, Robinson M, et al. Global, regional, and national prevalence of overweight and obesity in children and adults during 1980–2013: a systematic analysis for the Global Burden of Disease Study 2013. *The Lancet*. 2014;384(9945):766-781.
3. Chowdhury MAB, Uddin MJ, Haque MR, Ibrahimou B. Hypertension among adults in Bangladesh: evidence from a national cross-sectional survey. *BMC Cardiovascular Disorders*. 2016;16(1):22.
4. Chowdhury MAB, Uddin MJ, Khan HM, Haque MR. Type 2 diabetes and its correlates among adults in Bangladesh: a population based study. *BMC Public Health*. 2015;15:1070.
5. Organization WH. The Asia-Pacific perspective: redefining obesity and its treatment. Sydney: Health Communications Australia; 2000.
6. Swinburn BA, Sacks G, Hall KD, et al. The global obesity pandemic: shaped by global drivers and local environments. *The Lancet*. 2011;378(9793):804-814.
7. Cohen E, Boetsch G, Palstra F, Pasquet P. Social valorisation of stoutness as a determinant of obesity in the context of nutritional transition in Cameroon: The Bamiléké case. *Social Science & Medicine*. 2013;96:24-32.
8. Ziraba AK, Fotso JC, Ochako R. Overweight and obesity in urban Africa: A problem of the rich or the poor? *BMC public health*. 2009;9(1):465.
9. Snyder JD, Merson MH. The magnitude of the global problem of acute diarrhoeal disease: a review of active surveillance data. *Bulletin of the world Health Organization*. 1982;60(4):605.
10. Müller O, Krawinkel M. Malnutrition and health in developing countries. *Canadian Medical Association Journal*. 2005;173(3):279-286.
11. Sarma H, Saquib N, Hasan MM, et al. Determinants of overweight or obesity among ever-married adult women in Bangladesh. *BMC Obes*. 2016;3:13.
12. Akter J, Shahjahan M, Hossain S, et al. Determinants of overweight and obesity among Bangladeshi diabetic women of reproductive age. *BMC Res Notes*. 2014;7:513.
13. Cedergren MI. Maternal morbid obesity and the risk of adverse pregnancy outcome. *Obstetrics & Gynecology*. 2004;103(2):219-224.
14. Gunderson EP. Childbearing and obesity in women: weight before, during, and after pregnancy. *Obstetrics and gynecology clinics of North America*. 2009;36(2):317-332.
15. Baeten JM, Bukusi EA, Lambe M. Pregnancy complications and outcomes among overweight and obese nulliparous women. *American journal of public health*. 2001;91(3):436.
16. Galtier-Dereure F, Boegner C, Bringer J. Obesity and pregnancy: complications and cost. *The American journal of clinical nutrition*. 2000;71(5):1242s-1248s.
17. Triunfo S, Lanzzone A. Impact of overweight and obesity on obstetric outcomes. *J Endocrinol Invest*. 2014;37(4):323-329.
18. (NIPORT) NIOPRaT, Associates Ma, International I. *Bangladesh Demographic and Health Survey 2011*. Dhaka2013.
19. (BBS) BBoS. *Bangladesh Population and Housing Census 2011*. Dhaka: Government of the People's Republic of Bangladesh;2012.
20. Barba C, Cavalli-Sforza T, Cutter J, Darnton-Hill I. Appropriate body-mass index for Asian populations and its implications for policy and intervention strategies. *The lancet*. 2004;363(9403):157.
21. Clinical Guidelines on the Identification, Evaluation, and Treatment of Overweight and Obesity in Adults--The Evidence Report. National Institutes of Health. *Obes Res*. 1998;6 Suppl 2:51s-209s.

- 1
- 2
- 3
- 4 22. Mkuu RS, Epnere K, Chowdhury MAB. Prevalence and Predictors of Overweight and Obesity
- 5 Among Kenyan Women. *Preventing Chronic Disease*. 2018;15:E44.
- 6 23. Flegal KM, Graubard BI, Williamson DF, Gail MH. Cause-specific excess deaths associated with
- 7 underweight, overweight, and obesity. *Jama*. 2007;298(17):2028-2037.
- 8 24. Koblinsky M, Anwar I, Mridha MK, Chowdhury ME, Botlero R. Reducing maternal mortality and
- 9 improving maternal health: Bangladesh and MDG 5. *Journal of Health, Population and Nutrition*.
- 10 2008;280-294.
- 11 25. Chowdhury AMR, Bhuiya A, Chowdhury ME, Rasheed S, Hussain Z, Chen LC. The Bangladesh
- 12 paradox: exceptional health achievement despite economic poverty. *The Lancet*.
- 13 2013;382(9906):1734-1745.
- 14 26. Malik VS, Willett WC, Hu FB. Global obesity: trends, risk factors and policy implications. *Nature*
- 15 *Reviews Endocrinology*. 2013;9(1):13-27.
- 16 27. Vlismas K, Stavrinou V, Panagiotakos DB. Socio-economic status, dietary habits and health-
- 17 related outcomes in various parts of the world: a review. *Central European journal of public*
- 18 *health*. 2009;17(2):55.
- 19 28. Subramanian SV, Perkins JM, Khan KT. Do burdens of underweight and overweight coexist
- 20 among lower socioeconomic groups in India? *The American journal of clinical nutrition*.
- 21 2009;90(2):369-376.
- 22 29. Martín AR, Nieto JMM, Ruiz JPN, Jiménez LE. Overweight and obesity: the role of education,
- 23 employment and income in Spanish adults. *Appetite*. 2008;51(2):266-272.
- 24 30. Chowdhury MAB, Mkuu RS, Epnere K, et al. Risk factors for hypertension in early to mid-life
- 25 Kenyans: The Kenya Demographic and Health Survey. . Paper presented at: 38th Annual Meeting
- 26 and Scientific Sessions of the Society of Behavioral Medicine; March 29 - April 1, 2017, 2017; The
- 27 Hilton San Diego Bayfront in San Diego, CA.
- 28 31. Dinsa G, Goryakin Y, Fumagalli E, Suhrcke M. Obesity and socioeconomic status in developing
- 29 countries: a systematic review. *Obesity reviews*. 2012;13(11):1067-1079.
- 30 32. Al-Ghamdi SH. The association between watching television and obesity in children of school-
- 31 age in Saudi Arabia. *Journal of Family and Community Medicine*. 2013;20(2):83.
- 32 33. Deurenberg-Yap M, Chew S, Lin V, Tan B, Van Staveren W, Deurenberg P. Relationships between
- 33 indices of obesity and its co-morbidities in multi-ethnic Singapore. *International journal of*
- 34 *obesity*. 2001;25(10):1554.
- 35
- 36
- 37
- 38
- 39
- 40
- 41
- 42
- 43
- 44
- 45
- 46
- 47
- 48
- 49
- 50
- 51
- 52
- 53
- 54
- 55
- 56
- 57
- 58
- 59
- 60



## Tables

**Table 1.** Socio-demographic characteristics of the study participants by survey year, BDHS 1999-2014

| Variables                 | 1999         | 2004         | 2007         | 2011         | 2014          | p-value |
|---------------------------|--------------|--------------|--------------|--------------|---------------|---------|
| Age, mean(SD)             | 25.88 (6.63) | 30.56 (9.36) | 30.94 (9.3)  | 31.23 (9.22) | 31.37 (9.12)  | <0.001  |
| Age group, n (%)          |              |              |              |              |               | <0.001  |
| 15-24                     | 2148 (47.05) | 3303 (31.82) | 2996 (30.29) | 4557 (28.72) | 4433 (27.04)  |         |
| 25-34                     | 2007 (41.52) | 3533 (33.77) | 3344 (33.13) | 5603 (34.19) | 5969 (36.44)  |         |
| 35-44                     | 486 (10.61)  | 2598 (24.39) | 2747 (26.69) | 4321 (26.2)  | 4435 (26.05)  |         |
| 45+                       | 38 (0.81)    | 1055 (10.02) | 1040 (9.89)  | 1792 (10.89) | 1787 (10.47)  |         |
| Educational level, n (%)  |              |              |              |              |               | <0.001  |
| No education              | 2002 (44.62) | 4158 (42.44) | 3326 (34.85) | 4386 (28.59) | 4039 (25.68)  |         |
| Primary                   | 1364 (29.14) | 3070 (29.07) | 3014 (29.67) | 4857 (30.04) | 4875 (29.24)  |         |
| Secondary                 | 1072 (22.05) | 2629 (23.52) | 2983 (29.52) | 5731 (34.3)  | 6153 (36.76)  |         |
| Higher                    | 241 (4.19)   | 632 (4.97)   | 801 (5.96)   | 1299 (7.07)  | 1557 (8.32)   |         |
| Place of residence, n (%) |              |              |              |              |               | <0.001  |
| Urban                     | 1275 (17.76) | 3593 (22.58) | 3858 (22.81) | 5709 (26.1)  | 5764 (28.41)  |         |
| Rural                     | 3404 (82.24) | 6896 (77.42) | 6269 (77.19) | 11000 (73.9) | 11000 (71.59) |         |
| Geographic region, n (%)  |              |              |              |              |               | <0.001  |
| Barisal                   | 434 (6.48)   | 1252 (6.33)  | 1327 (6.01)  | 1819 (5.45)  | 1982 (6.19)   |         |
| Chittagong                | 937 (20.08)  | 1869 (17.56) | 1775 (18.23) | 2616 (18)    | 2639 (18.29)  |         |
| Dhaka                     | 1123 (31.05) | 2376 (31.27) | 2178 (31.5)  | 2795 (32.18) | 2893 (34.96)  |         |
| Khulna                    | 760 (11.42)  | 1583 (12.32) | 1589 (12.77) | 2488 (12.4)  | 2460 (10.51)  |         |
| Rajshahi                  | 889 (24.48)  | 2374 (26.35) | 1933 (25.31) | 4703 (26.73) | 4769 (23.56)  |         |
| Sylhet                    | 536 (6.49)   | 1035 (6.17)  | 1325 (6.18)  | 1852 (5.25)  | 1881 (6.49)   |         |
| Marital status, n (%)     |              |              |              |              |               | <0.001  |
| Not married               | 130 (2.71)   | 859 (7.93)   | 822 (7.7)    | 1091 (6.6)   | 1014 (5.95)   |         |
| Married                   | 4549 (97.29) | 9630 (92.07) | 9305 (92.3)  | 15000 (93.4) | 16000 (94.05) |         |
| <b>Urban</b>              |              |              |              |              |               |         |
| BMI, Kg/m <sup>2</sup>    |              |              |              |              |               | <0.001  |
| Mean (SD)                 | 20.78 (4.51) | 21.52 (5.06) | 22.24 (5.44) | 23 (4.87)    | 23.7 (5.06)   |         |
| BMI categories, n (%)     |              |              |              |              |               | <0.001  |
| Underweight               | 385 (29.74)  | 903 (24.84)  | 787 (19.54)  | 879 (13.46)  | 738 (12.21)   |         |
| Normal weight             | 585 (45.65)  | 1573 (44.47) | 1629 (41.73) | 2298 (41.4)  | 1996 (34.73)  |         |
| Overweight                | 237 (19.09)  | 801 (21.87)  | 1010 (26.88) | 1729 (30.62) | 1971 (33.74)  |         |
| Obese                     | 68 (5.53)    | 316 (8.81)   | 432 (11.85)  | 803 (14.52)  | 1059 (19.32)  |         |
| Overweight or obese       | 305 (24.61)  | 1117 (30.68) | 1442 (38.73) | 2532 (45.14) | 3030 (53.06)  |         |
| <b>Rural</b>              |              |              |              |              |               |         |
| BMI, Kg/m <sup>2</sup>    |              |              |              |              |               | <0.001  |
| Mean (SD)                 | 18.97 (2.42) | 19.76 (2.72) | 20.18 (2.83) | 20.82 (3.29) | 21.71 (3.62)  |         |
| BMI categories, n (%)     |              |              |              |              |               | <0.001  |
| Underweight               | 1636 (48.19) | 2581 (36.9)  | 2107 (32.45) | 2940 (27.83) | 2353 (21.09)  |         |
| Normal weight             | 1560 (45.76) | 3422 (49.82) | 3135 (50.72) | 5138 (48.59) | 4926 (45.3)   |         |
| Overweight                | 174 (5.03)   | 762 (11.36)  | 851 (13.88)  | 1997 (18.97) | 2780 (26.24)  |         |

**Table 1.** Socio-demographic characteristics of the study participants by survey year, BDHS 1999-2014

| Variables                         | 1999         | 2004         | 2007         | 2011          | 2014          | p-value |
|-----------------------------------|--------------|--------------|--------------|---------------|---------------|---------|
| Obese                             | 34 (1.02)    | 131 (1.92)   | 176 (2.96)   | 489 (4.62)    | 801 (7.38)    |         |
| Overweight or obese               | 208 (6.05)   | 893 (13.28)  | 1027 (16.83) | 2486 (23.58)  | 3581 (33.62)  |         |
| Wealth index, n (%)               |              |              |              |               |               | 0.1665  |
| Poorest                           | NA           | 1865 (19.85) | 1636 (19.19) | 2811 (18.29)  | 2999 (18.55)  |         |
| Poorer                            | NA           | 1880 (19.92) | 1822 (19.35) | 2995 (19.47)  | 3102 (18.95)  |         |
| Middle                            | NA           | 1960 (19.77) | 1910 (19.72) | 3129 (20.07)  | 3382 (20.04)  |         |
| Richer                            | NA           | 2098 (20.38) | 2043 (20.85) | 3472 (20.83)  | 3534 (21.21)  |         |
| Richest                           | NA           | 2686 (20.08) | 2716 (20.88) | 3866 (21.34)  | 3607 (21.24)  |         |
| Watch TV (once a week), n (%)     |              |              |              |               |               | <0.001  |
| No                                | 2946 (66.99) | 5459 (54.5)  | 5138 (53.2)  | 8149 (51.61)  | 7997 (48.83)  |         |
| Yes                               | 1732 (33.01) | 5027 (45.5)  | 4985 (46.8)  | 8120 (48.39)  | 8626 (51.17)  |         |
| Currently working, n (%)          |              |              |              |               |               |         |
| No                                | 3839 (81.19) | 8098 (76.85) | 7068 (67.12) | 14000 (86.62) | 11000 (65.85) |         |
| Yes                               | 840 (18.81)  | 2390 (23.15) | 3055 (32.88) | 2216 (13.38)  | 5398 (34.15)  |         |
| Number of living children, n (%)  |              |              |              |               |               | <0.001  |
| 0                                 | 67 (1.46)    | 1017 (9.39)  | 930 (8.78)   | 1371 (8.53)   | 1385 (7.96)   |         |
| 1-2                               | 2669 (56.66) | 4590 (43.15) | 4769 (47.11) | 8236 (50.09)  | 8857 (53.48)  |         |
| 3-4                               | 1358 (29.25) | 3312 (32.45) | 3111 (31.61) | 5102 (31.64)  | 5013 (30.45)  |         |
| >5                                | 585 (12.63)  | 1570 (15.01) | 1317 (12.5)  | 1564 (9.74)   | 1369 (8.11)   |         |
| Number of household member, n (%) |              |              |              |               |               | <0.001  |
| 1-2                               | 46 (1.03)    | 382 (3.71)   | 405 (4.11)   | 694 (4.46)    | 834 (5.27)    |         |
| 3-4                               | 1208 (26.22) | 3079 (30.31) | 3171 (32.63) | 5633 (34.65)  | 6224 (37.36)  |         |
| >5                                | 3425 (72.75) | 7028 (65.99) | 6551 (63.25) | 9946 (60.89)  | 9566 (57.36)  |         |
| Contraceptive use, n (%)          |              |              |              |               |               | <0.001  |
| Not using                         | 2060 (44.71) | 4422 (41.76) | 4555 (44.02) | 6260 (38.76)  | 6227 (37.19)  |         |
| Pills                             | 1352 (2.904) | 2641 (2.606) | 2734 (2.835) | 4385 (2.725)  | 4476 (2.717)  |         |
| Other                             | 1267 (26.25) | 3426 (32.18) | 2838 (27.63) | 5628 (33.99)  | 5921 (35.64)  |         |
| Husband education, n (%)          |              |              |              |               |               | <0.001  |
| No education                      | 1851 (42.48) | 3818 (39.16) | 3342 (35.92) | 4833 (31.73)  | 4764 (29.5)   |         |
| Primary                           | 1102 (24.24) | 2629 (25.34) | 2610 (25.78) | 4362 (26.89)  | 4503 (27.1)   |         |
| Secondary                         | 1098 (23.05) | 2691 (24.43) | 2660 (25.94) | 4680 (27.93)  | 4884 (29.71)  |         |
| Higher                            | 549 (10.23)  | 1342 (11.07) | 1501 (12.37) | 2390 (13.46)  | 2471 (13.69)  |         |

**Table 2.** Association of overweight and obesity with socio demographic characteristics by place of residence, BDHS 1999-2014

|                            | Urban                  |         |                   |         | Rural                  |         |                    |         |
|----------------------------|------------------------|---------|-------------------|---------|------------------------|---------|--------------------|---------|
|                            | Overweight vs. healthy |         | Obese vs. healthy |         | Overweight vs. healthy |         | Obese vs. healthy  |         |
| Age group                  | RR (95% CI)            | p-value | RR (95% CI)       | p-value | RR (95% CI)            | p-value | RR (95% CI)        | p-value |
| 15-24                      | Ref                    |         | Ref               |         | Ref                    |         | Ref                |         |
| 25-34                      | 2.39 (2.11, 2.70)      | 0.000   | 4.04 (3.34, 4.87) | 0.00    | 2.09 (1.9, 2.31)       | 0.000   | 3.23 (2.67, 3.91)  | 0.000   |
| 35-44                      | 3.14 (2.74, 3.59)      | 0.000   | 6.77 (5.56, 8.24) | 0.00    | 2.45 (2.2, 2.73)       | 0.000   | 4.06 (3.30, 4.99)  | 0.000   |
| 45+                        | 2.59 (2.15, 3.12)      | 0.000   | 6.22 (4.88, 7.92) | 0.00    | 2.47 (2.14, 2.86)      | 0.000   | 3.69 (2.87, 4.74)  | 0.000   |
| Education level            |                        |         |                   |         |                        |         |                    |         |
| No education               | Ref                    |         | Ref               |         | Ref                    |         | Ref                |         |
| Primary                    | 1.22 (1.06, 1.41)      | 0.006   | 1.25 (1.01, 1.54) | 0.03    | 1.11 (1.01, 1.23)      | 0.023   | 1.22 (1.02, 1.46)  | 0.026   |
| Secondary                  | 1.41 (1.20, 1.65)      | 0.000   | 1.61 (1.29, 2.02) | 0.00    | 1.15 (1.03, 1.30)      | 0.014   | 1.27 (1.04, 1.55)  | 0.019   |
| Higher                     | 1.61 (1.30, 1.99)      | 0.000   | 1.42 (1.07, 1.90) | 0.02    | 1.12 (0.92, 1.36)      | 0.238   | 0.92 (0.67, 1.27)  | 0.649   |
| Marital status             |                        |         |                   |         |                        |         |                    |         |
| Not married                | Ref                    |         |                   |         |                        |         |                    |         |
| Married                    | 1.27 (1.04, 1.56)      | 0.018   | 1.41 (1.07, 1.86) | 0.01    | NA                     | NA      | NA                 | NA      |
| Wealth index               |                        |         |                   |         |                        |         |                    |         |
| Poorest                    | Ref                    |         | Ref               |         | Ref                    |         | Ref                |         |
| Poorer                     | 1.15 (0.87, 1.52)      | 0.317   | 0.99 (0.58, 1.70) | 0.99    | 1.32 (1.17, 1.49)      | 0.000   | 1.45 (1.11, 1.90)  | 0.006   |
| Middle                     | 1.65 (1.29, 2.11)      | 0.000   | 1.63 (1.02, 2.61) | 0.04    | 1.65 (1.46, 1.87)      | 0.000   | 2.30 (1.78, 2.97)  | 0.000   |
| Richer                     | 1.88 (1.49, 2.37)      | 0.000   | 2.55 (1.64, 3.96) | 0.00    | 2.46 (2.16, 2.8)       | 0.000   | 3.94 (3.05, 5.10)  | 0.000   |
| Richest                    | 2.83 (2.24, 3.57)      | 0.000   | 5.58 (3.6, 8.63)  | 0.00    | 3.38 (2.9, 3.94)       | 0.000   | 7.88 (5.93, 10.46) | 0.000   |
| Watch TV (once a week)     |                        |         |                   |         |                        |         |                    |         |
| No                         | Ref                    |         | Ref               |         | Ref                    |         | Ref                |         |
| Yes                        | 1.28 (1.13, 1.45)      | 0.000   | 1.72 (1.43, 2.07) | 0.00    | 1.25 (1.15, 1.35)      | 0.000   | 1.4 (1.22, 1.62)   | 0.000   |
| Currently working          |                        |         |                   |         |                        |         |                    |         |
| No                         | Ref                    |         | Ref               |         |                        |         |                    |         |
| Yes                        | 0.79 (0.71, 0.89)      | 0.000   | 0.54 (0.46, 0.64) | 0.00    | NA                     | NA      | NA                 | NA      |
| Number of household member |                        |         |                   |         |                        |         |                    |         |
| 1-2                        |                        |         |                   |         | Ref                    |         | Ref                |         |
| 3-4                        | NA                     | NA      | NA                | NA      | 0.86 (0.72, 1.02)      | 0.093   | 0.86 (0.64, 1.16)  | 0.353   |
| >5                         | NA                     | NA      | NA                | NA      | 0.71 (0.60, 0.84)      | 0.000   | 0.61 (0.45, 0.81)  | 0.001   |
| Contraceptive use          |                        |         |                   |         |                        |         |                    |         |
| Not using                  | Ref                    |         |                   |         | Ref                    |         | Ref                |         |
| Pills                      | 0.96 (0.85, 1.09)      | 0.605   | 0.79 (0.67, 0.94) | 0.01    | 1.06 (0.98, 1.16)      | 0.130   | 0.83 (0.70, 0.97)  | 0.022   |
| Other                      | 1.07 (0.95, 1.20)      | 0.237   | 1.04 (0.9, 1.20)  | 0.55    | 1.08 (0.99, 1.18)      | 0.053   | 0.94 (0.82, 1.09)  | 0.459   |
| Husband education          |                        |         |                   |         |                        |         |                    |         |
| No education               | Ref                    |         | Ref               |         | Ref                    |         | Ref                |         |
| Primary                    | 1.11 (0.95, 1.29)      | 0.164   | 1.12 (0.89, 1.4)  | 0.32    | 1.07 (0.97, 1.18)      | 0.132   | 1.22 (1.01, 1.47)  | 0.037   |
| Secondary                  | 1.18 (1.01, 1.37)      | 0.031   | 1.32 (1.05, 1.65) | 0.02    | 1.2 (1.08, 1.34)       | 0.001   | 1.51 (1.25, 1.82)  | 0.000   |
| Higher                     | 1.55 (1.28, 1.88)      | 0.000   | 1.94 (1.49, 2.52) | 0.00    | 1.46 (1.25, 1.69)      | 0.000   | 1.98 (1.55, 2.53)  | 0.000   |
| Survey year                |                        |         |                   |         |                        |         |                    |         |
| 2004                       | Ref                    |         | Ref               |         | Ref                    |         | Ref                |         |
| 2007                       | 1.23 (1.07, 1.42)      | 0.003   | 1.35 (1.11, 1.64) | 0.00    | 1.19 (1.06, 1.35)      | 0.004   | 1.49 (1.15, 1.93)  | 0.002   |
| 2011                       | 1.43 (1.26, 1.63)      | 0.000   | 1.68 (1.40, 2.00) | 0.00    | 1.71 (1.54, 1.90)      | 0.000   | 2.50 (2.00, 3.13)  | 0.000   |
| 2014                       | 2.07 (1.81, 2.37)      | 0.000   | 3.23 (2.71, 3.86) | 0.00    | 2.60 (2.33, 2.89)      | 0.000   | 4.47 (3.59, 5.57)  | 0.000   |

**Figure legends**

Figure 1. Kernel density plot of the distribution of BMI for reproductive-age women in 1999, 2004, 2007, 2011, and 2014

Figure 2. Prevalence of overweight and obesity by survey year, BDHS 1999-2014

Figure 3. Prevalence of underweight, normal, overweight, and obesity by year and place of residence BDHS 1999-2014

Figure S1. Prevalence of BMI categories International cutoff

Figure S2. Prevalence of underweight, normal, overweight, and obesity by year and place of residence BDHS 1999-2014 (International cutoff)

### List of Abbreviations

|      |                                          |
|------|------------------------------------------|
| ARR  | Adjusted risk ratio                      |
| BMI  | Body mass index                          |
| CI   | Confidence interval                      |
| CVD  | Cardiovascular diseases                  |
| WHO  | World Health Organization                |
| BDHS | Bangladesh Demographic and Health Survey |

### Ethical approval and consent

All BDHS surveys received ethical approval from ICF Macro Institutional Review Board, Maryland, USA and National Research Ethics Committee of Bangladesh Medical Research Council (BMRC), Dhaka, Bangladesh. Informed consent was obtained from each participant of the survey before enrolling in the survey by using the Introduction and Consent form of the survey. It was also explained that the information will be kept strictly confidential and will not be shared with anyone except members of the survey team.

**Consent to publish:** Not Applicable

### Availability of data/ Data sharing statement

The datasets used for the current study are publicly available from <http://dhsprogram.com/data/available-datasets.cfm>.

**Funding:** This research received no specific grant from any funding agency in the public, commercial or not-for-profit sectors

**Acknowledgement:** We gratefully acknowledge DHS for allowing us to use the data.

**Disclosure/ Conflict of interest:** None

**Author contribution:** MC conceptualized the study and designed the analytical approach, performed the data analyses and interpreted the findings, and led the writing of the article. MA was involved in the literature search and drafting the manuscript. ZH helped conceptualize the study literature, variable selection, editing and drafting the manuscript. Revised the manuscript critically for important intellectual content, and final approval of the version to be submitted. All authors helped write the manuscript. All authors read and approved the final manuscript.

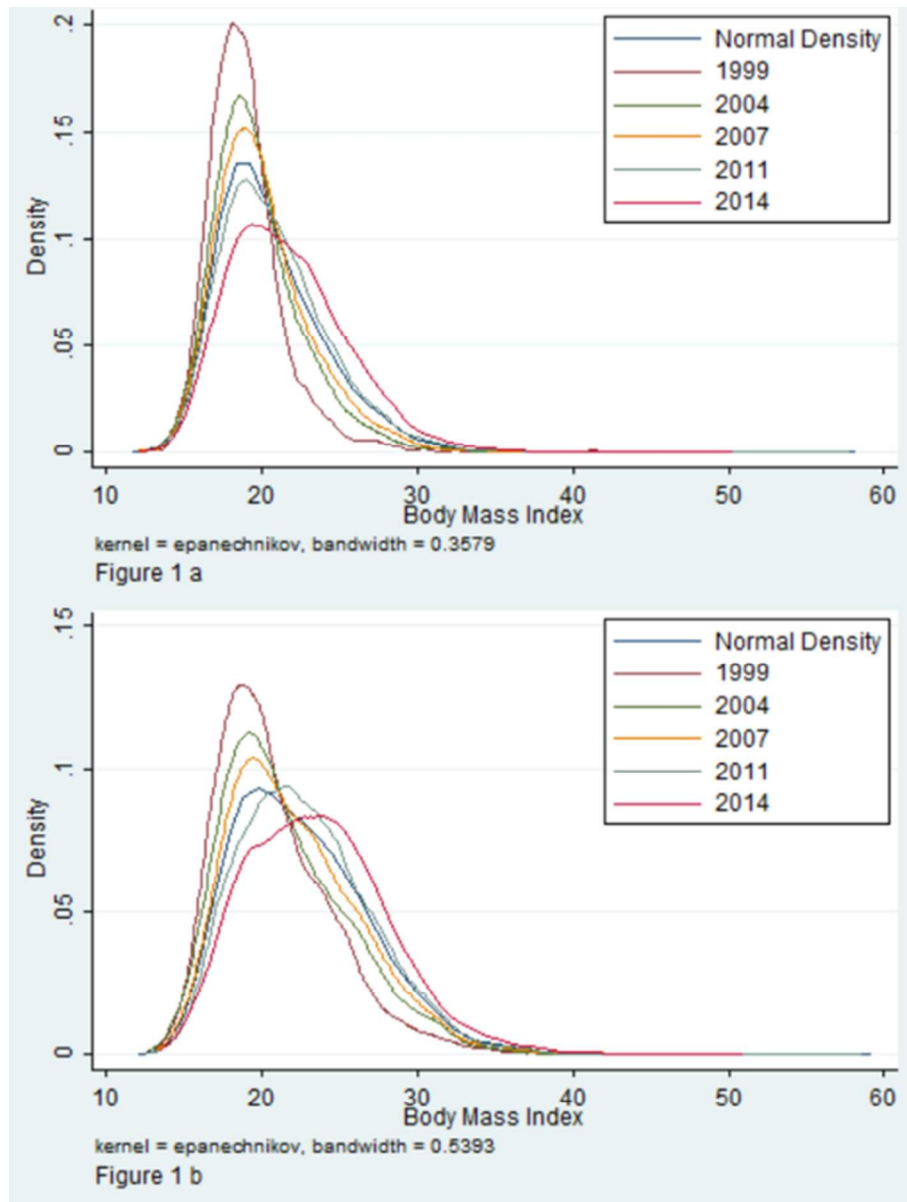

Figure 1. Kernel density plot of the distribution of BMI for reproductive-age women in 1999, 2004, 2007, 2011, and 2014

1  
2  
3  
4  
5  
6  
7  
8  
9  
10  
11  
12  
13  
14  
15  
16  
17  
18  
19  
20  
21  
22  
23  
24  
25  
26  
27  
28  
29  
30  
31  
32  
33  
34  
35  
36  
37  
38  
39  
40  
41  
42  
43  
44  
45  
46  
47  
48  
49  
50  
51  
52  
53  
54  
55  
56  
57  
58  
59  
60

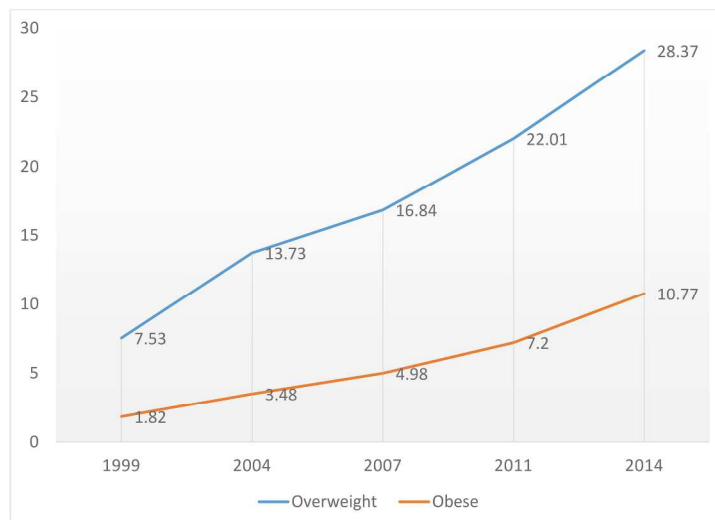

Figure 2. Prevalence of overweight and obesity by survey year, BDHS 1999-2014

Figure 2. Prevalence of overweight and obesity by survey year, BDHS 1999-2014

279x361mm (300 x 300 DPI)

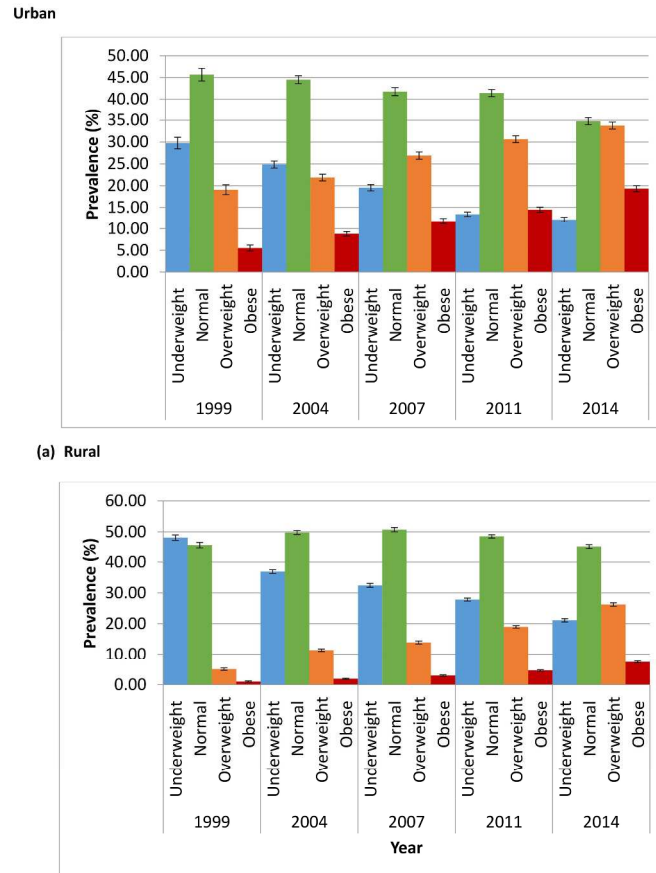

Figure 3. Prevalence of underweight, normal, overweight, and obesity by year and place of residence BDHS 1999-2014

Figure 3. Prevalence of underweight, normal, overweight, and obesity by year and place of residence BDHS 1999-2014

279x361mm (300 x 300 DPI)



## Supplements

**Table S1.** Variance inflation (VIF) values of final models of urban and rural women, BDHS 1999-2014

| Variables                        | VIF- Urban | VIF-Rural |
|----------------------------------|------------|-----------|
| Age                              | 1.09       | 1.29      |
| Education                        | 2.03       | 1.97      |
| Marital status                   | 1.18       | 1.12      |
| Wealth index                     | 1.49       | 1.69      |
| Watching TV at least once a week | 1.29       | 1.32      |
| Currently working                | 1.08       | 1.04      |
| No. of household members         | 1.04       | 1.05      |
| Contraceptive use                | 1.12       | 1.09      |
| Husband education                | 2.03       | 1.71      |
| Survey year                      | 1.02       | 1.05      |

**Table S2.** Summary characteristics of the sample by survey year, BDHS 1999-2014

| Variable                        | 1999-00 | 2004  | 2007  | 2011  | 2014  |
|---------------------------------|---------|-------|-------|-------|-------|
| Initial sample of the survey, n | 10544   | 11440 | 10996 | 17842 | 17863 |
| BMI available, n                | 5055    | 11176 | 10836 | 17309 | 17683 |
| Pregnant women, n               | 376     | 678   | 709   | 1036  | 1059  |
| Final working sample, n         | 4679    | 10489 | 10127 | 16273 | 16624 |
| Response rate, %                | 96.9    | 98.6  | 98.4  | 97.9  | 97.9  |

For peer review only

**Table S3.** Prevalence of BMI categories of reproductive women by age and place of residence in Bangladesh, BDHS 1999 - 2014

| Age groups    | Urban   |                      |                      |                      |                      | Rural                |                      |                      |                      |                      |                      |
|---------------|---------|----------------------|----------------------|----------------------|----------------------|----------------------|----------------------|----------------------|----------------------|----------------------|----------------------|
|               | 1999    | 2004                 | 2007                 | 2011                 | 2014                 | 1999                 | 2004                 | 2007                 | 2011                 | 2014                 |                      |
| Underweight   | 15-24   | 32.75 (28.78, 36.98) | 30.81 (27.83, 33.97) | 27.4 (24.41, 30.61)  | 20.14 (17.89, 22.6)  | 20.99 (18.44, 23.79) | 48.38 (45.86, 50.92) | 38.91 (36.79, 41.08) | 33.95 (31.7, 36.26)  | 34.01 (32.2, 35.87)  | 27.45 (25.42, 29.58) |
|               | 25-34   | 27.16 (23.64, 31)    | 20.91 (18.54, 23.5)  | 17.35 (15.12, 19.83) | 11.23 (9.68, 13)     | 8.34 (6.98, 9.92)    | 45.07 (42.38, 47.79) | 34.26 (32.21, 36.37) | 29.2 (27.08, 31.41)  | 24.12 (22.65, 25.66) | 17.81 (16.16, 19.6)  |
|               | 35-44   | 28.42 (20.42, 38.06) | 21.4 (18.58, 24.51)  | 14.18 (12.04, 16.63) | 9.53 (7.94, 11.4)    | 9.37 (7.69, 11.38)   | 57.48 (52.25, 62.55) | 35.4 (32.99, 37.89)  | 32.94 (30.5, 35.48)  | 24.75 (23.05, 26.53) | 17.98 (16.13, 19.99) |
|               | 45+     | 35.89 (8.84, 76.36)  | 30.27 (25.06, 36.03) | 20.51 (16.36, 25.39) | 12.56 (9.83, 15.92)  | 10.61 (7.61, 14.61)  | 60.97 (42.57, 76.7)  | 42.56 (38.75, 46.46) | 37.24 (33.25, 41.42) | 30.41 (27.56, 33.42) | 23.58 (20.29, 27.22) |
|               | Overall | 29.73 (27.21, 32.39) | 24.84 (23.32, 26.42) | 19.54 (18.17, 20.99) | 13.46 (12.45, 14.54) | 12.2 (11.16, 13.34)  | 48.18 (46.47, 49.91) | 36.89 (35.7, 38.11)  | 32.44 (31.2, 33.71)  | 27.82 (26.91, 28.76) | 21.08 (20.06, 22.15) |
| Normal weight | 15-24   | 50.62 (46.22, 55.01) | 53.21 (49.83, 56.56) | 50.64 (47.17, 54.11) | 53.98 (50.91, 57.02) | 45.47 (42.22, 48.77) | 47.42 (44.89, 49.95) | 53.54 (51.33, 55.74) | 55.29 (52.86, 57.69) | 52.08 (50.14, 54)    | 50.84 (48.49, 53.18) |
|               | 25-34   | 41.45 (37.43, 45.59) | 44.68 (41.65, 47.75) | 41.3 (38.23, 44.45)  | 37.8 (35.15, 40.51)  | 32.71 (30.19, 35.34) | 46.8 (44.08, 49.54)  | 51.15 (48.95, 53.35) | 51.6 (49.21, 53.98)  | 48.32 (46.57, 50.08) | 44.57 (42.49, 46.67) |
|               | 35-44   | 45.09 (35.42, 55.14) | 37.9 (34.44, 41.5)   | 35.36 (32.17, 38.68) | 34 (31.08, 37.05)    | 27.75 (24.94, 30.74) | 35.71 (30.86, 40.88) | 46.98 (44.42, 49.55) | 47.49 (44.83, 50.16) | 47.15 (45.16, 49.15) | 42.17 (39.77, 44.61) |
|               | 45+     | 19.96 (4.12, 59.13)  | 33.66 (28.29, 39.49) | 36.66 (31.3, 42.36)  | 37.87 (33.33, 42.63) | 32.15 (27.54, 37.14) | 35.62 (20.55, 54.2)  | 40.37 (36.59, 44.27) | 41.94 (37.8, 46.2)   | 43.56 (40.47, 46.71) | 41.06 (37.55, 44.66) |
|               | Overall | 45.64 (42.81, 48.51) | 44.47 (42.65, 46.3)  | 41.72 (39.93, 43.53) | 41.39 (39.8, 43)     | 34.72 (33.15, 36.33) | 45.76 (44.03, 47.49) | 49.82 (48.55, 51.08) | 50.72 (49.36, 52.08) | 48.58 (47.56, 49.61) | 45.29 (44.05, 46.53) |
| Overweight    | 15-24   | 14.31 (11.51, 17.65) | 12.51 (10.46, 14.89) | 17.63 (15.1, 20.47)  | 20.18 (17.81, 22.79) | 25.42 (22.67, 28.38) | 3.36 (2.58, 4.37)    | 6.7 (5.67, 7.89)     | 9.56 (8.19, 11.14)   | 11.81 (10.63, 13.1)  | 17.95 (16.33, 19.7)  |
|               | 25-34   | 23.9 (20.55, 27.6)   | 25.73 (23.15, 28.49) | 28.99 (26.19, 31.96) | 35.56 (32.95, 38.26) | 37.7 (35.09, 40.38)  | 6.74 (5.49, 8.24)    | 12.09 (10.72, 13.6)  | 15.66 (14, 17.48)    | 22.03 (20.61, 23.52) | 29.31 (27.47, 31.23) |
|               | 35-44   | 15.79 (9.58, 24.92)  | 26.82 (23.77, 30.11) | 33.17 (30.02, 36.48) | 35.55 (32.57, 38.66) | 37.62 (34.59, 40.74) | 6.1 (4.06, 9.08)     | 15.05 (13.29, 17)    | 15.67 (13.83, 17.71) | 22.4 (20.78, 24.1)   | 30.09 (27.93, 32.34) |
|               | 45+     | 26.19 (3.91, 75.55)  | 23.39 (18.71, 28.83) | 27.28 (22.51, 32.65) | 30.3 (26.11, 34.84)  | 31.21 (26.62, 36.19) | 3.4 (0.47, 20.56)    | 15 (12.32, 18.14)    | 16.66 (13.73, 20.07) | 20.06 (17.69, 22.67) | 27.57 (23.99, 31.47) |
|               | Overall | 19.08 (16.95, 21.42) | 21.87 (20.42, 23.39) | 26.87 (25.28, 28.53) | 30.62 (29.14, 32.14) | 33.74 (32.19, 35.32) | 5.02 (4.33, 5.83)    | 11.35 (10.57, 12.18) | 13.87 (12.96, 14.84) | 18.96 (18.18, 19.78) | 26.24 (25.17, 27.34) |
| Obese         | 15-24   | 2.3 (1.28, 4.1)      | 3.44 (2.4, 4.92)     | 4.31 (3.07, 6.02)    | 5.67 (4.44, 7.22)    | 8.09 (6.49, 10.05)   | 0.82 (0.46, 1.44)    | 0.83 (0.51, 1.35)    | 1.18 (0.75, 1.86)    | 2.08 (1.59, 2.71)    | 3.74 (3.01, 4.64)    |
|               | 25-34   | 7.47 (5.54, 10)      | 8.65 (7.03, 10.6)    | 12.33 (10.41, 14.55) | 15.39 (13.48, 17.52) | 21.23 (18.96, 23.69) | 1.37 (0.86, 2.18)    | 2.47 (1.86, 3.29)    | 3.52 (2.72, 4.55)    | 5.51 (4.76, 6.36)    | 8.28 (7.32, 9.36)    |
|               | 35-44   | 10.68 (5.53, 19.6)   | 13.86 (11.59, 16.48) | 17.26 (14.78, 20.07) | 20.9 (18.41, 23.62)  | 25.24 (22.51, 28.19) | 0.68 (0.17, 2.71)    | 2.56 (1.83, 3.56)    | 3.88 (2.99, 5.02)    | 5.68 (4.83, 6.66)    | 9.74 (8.53, 11.1)    |
|               | 45+     | 17.94 (2.42, 65.83)  | 12.66 (9.27, 17.07)  | 15.53 (11.73, 20.29) | 19.25 (15.73, 23.34) | 26.01 (21.83, 30.67) | NA                   | 2.05 (1.2, 3.49)     | 4.14 (2.69, 6.32)    | 5.94 (4.64, 7.58)    | 7.77 (6.2, 9.69)     |
|               | Overall | 5.52 (4.32, 7.04)    | 8.81 (7.84, 9.88)    | 11.85 (10.71, 13.08) | 14.51 (13.41, 15.69) | 19.32 (18.01, 20.69) | 1.02 (0.72, 1.44)    | 1.92 (1.59, 2.31)    | 2.95 (2.52, 3.45)    | 4.61 (4.2, 5.06)     | 7.37 (6.82, 7.97)    |

Table S4. Prevalence of BMI categories of reproductive women by age and place of residence in Bangladesh, BDHS 1999 - 2014 (International cutoff)

|               |  | Urban                |                      |                      |                      |                      | Rural                |                      |                      |                      |                      |
|---------------|--|----------------------|----------------------|----------------------|----------------------|----------------------|----------------------|----------------------|----------------------|----------------------|----------------------|
|               |  | 1999                 | 2004                 | 2007                 | 2011                 | 2014                 | 1999-00              | 2004                 | 2007                 | 2011                 | 2014                 |
| Underweight   |  | 32.75 (28.78, 36.98) | 30.81 (27.83, 33.97) | 27.4 (24.41, 30.61)  | 20.14 (17.89, 22.6)  | 20.99 (18.44, 23.79) | 48.38 (45.86, 50.92) | 38.91 (36.79, 41.08) | 33.95 (31.7, 36.26)  | 34.01 (32.2, 35.87)  | 27.45 (25.42, 29.58) |
|               |  | 27.16 (23.64, 31)    | 20.91 (18.54, 23.5)  | 17.35 (15.12, 19.83) | 11.23 (9.68, 13)     | 8.34 (6.98, 9.92)    | 45.07 (42.38, 47.79) | 34.26 (32.21, 36.37) | 29.2 (27.08, 31.41)  | 24.12 (22.65, 25.66) | 17.81 (16.16, 19.6)  |
|               |  | 28.42 (20.42, 38.06) | 21.4 (18.58, 24.51)  | 14.18 (12.04, 16.63) | 9.53 (7.94, 11.4)    | 9.37 (7.69, 11.38)   | 57.48 (52.25, 62.55) | 35.4 (32.99, 37.89)  | 32.94 (30.5, 35.48)  | 24.75 (23.05, 26.53) | 17.98 (16.13, 19.99) |
|               |  | 35.89 (8.84, 76.36)  | 30.27 (25.06, 36.03) | 20.51 (16.36, 25.39) | 12.56 (9.83, 15.92)  | 10.61 (7.61, 14.61)  | 60.97 (42.57, 76.7)  | 42.56 (38.75, 46.46) | 37.24 (33.25, 41.42) | 30.41 (27.56, 33.42) | 23.58 (20.29, 27.22) |
|               |  | 29.73 (27.21, 32.39) | 24.84 (23.32, 26.42) | 19.54 (18.17, 20.99) | 13.46 (12.45, 14.54) | 12.2 (11.16, 13.34)  | 48.18 (46.47, 49.91) | 36.89 (35.7, 38.11)  | 32.44 (31.2, 33.71)  | 27.82 (26.91, 28.76) | 21.08 (20.06, 22.15) |
| Normal weight |  | 60.28 (55.93, 64.48) | 60.8 (57.48, 64.02)  | 62.4 (58.97, 65.72)  | 66.43 (63.53, 69.2)  | 59.81 (56.54, 62.98) | 49.84 (47.3, 52.37)  | 58.05 (55.85, 60.21) | 61.86 (59.48, 64.18) | 59.97 (58.06, 61.85) | 61.91 (59.64, 64.13) |
|               |  | 55.78 (51.59, 59.89) | 57.51 (54.44, 60.52) | 56.31 (53.15, 59.41) | 57.53 (54.77, 60.23) | 51.95 (49.19, 54.7)  | 51.45 (48.72, 54.17) | 59.71 (57.54, 61.85) | 60.19 (57.82, 62.51) | 61.03 (59.3, 62.73)  | 60.12 (58.05, 62.16) |
|               |  | 53.39 (43.32, 63.19) | 50.67 (47.04, 54.3)  | 52.6 (49.17, 56)     | 51.3 (48.14, 54.45)  | 44.95 (41.78, 48.16) | 39.23 (34.25, 44.44) | 56.17 (53.61, 58.7)  | 57.42 (54.77, 60.02) | 61.14 (59.16, 63.07) | 59.66 (57.26, 62.01) |
|               |  | 19.96 (4.12, 59.13)  | 43.23 (37.44, 49.21) | 50.28 (44.61, 55.94) | 52.82 (48.04, 57.55) | 45.45 (40.36, 50.64) | 35.62 (20.55, 54.2)  | 50.06 (46.14, 53.98) | 54.54 (50.29, 58.72) | 55.41 (52.25, 58.52) | 56.51 (52.71, 60.24) |
|               |  | 57.4 (54.54, 60.21)  | 55.43 (53.6, 57.24)  | 56.33 (54.52, 58.14) | 57.89 (56.29, 59.47) | 51.49 (49.82, 53.16) | 49.17 (47.44, 50.9)  | 57.33 (56.08, 58.57) | 59.43 (58.09, 60.75) | 60.14 (59.13, 61.15) | 60.11 (58.89, 61.32) |
| Overweight    |  | 5.82 (4.11, 8.17)    | 6.59 (5.15, 8.41)    | 8.67 (6.88, 10.86)   | 11.08 (9.32, 13.12)  | 15.63 (13.42, 18.13) | 1.28 (0.82, 2.01)    | 2.91 (2.25, 3.75)    | 3.82 (2.96, 4.91)    | 5.34 (4.55, 6.25)    | 9.52 (8.33, 10.87)   |
|               |  | 14.07 (11.39, 17.26) | 17.65 (15.41, 20.15) | 21.33 (18.84, 24.05) | 24.61 (22.29, 27.09) | 31.22 (28.7, 33.85)  | 2.95 (2.14, 4.05)    | 5 (4.13, 6.05)       | 9.64 (8.32, 11.15)   | 13.06 (11.92, 14.29) | 19.1 (17.61, 20.68)  |
|               |  | 13.61 (7.8, 22.66)   | 22.23 (19.39, 25.35) | 25.93 (23.03, 29.06) | 30.21 (27.36, 33.23) | 33.2 (30.3, 36.23)   | 3.28 (1.86, 5.7)     | 7.67 (6.37, 9.21)    | 8.91 (7.5, 10.55)    | 12.01 (10.77, 13.37) | 18.54 (16.79, 20.42) |
|               |  | 44.14 (12.09, 81.39) | 21.23 (16.77, 26.51) | 21.68 (17.25, 26.88) | 24.62 (20.76, 28.93) | 30.73 (26.28, 35.57) | 3.4 (0.47, 20.56)    | 6.38 (4.69, 8.62)    | 7.07 (5.22, 9.52)    | 11.55 (9.72, 13.67)  | 17.18 (14.72, 19.95) |
|               |  | 10.57 (8.92, 12.47)  | 15.87 (14.59, 17.23) | 19.18 (17.78, 20.66) | 22.25 (20.93, 23.63) | 27.56 (26.11, 29.06) | 2.19 (1.73, 2.77)    | 5.1 (4.57, 5.69)     | 7.39 (6.71, 8.13)    | 10.39 (9.79, 11.03)  | 16.14 (15.3, 17.02)  |
| Obese         |  | 1.13 (0.49, 2.59)    | 1.78 (1.05, 2.99)    | 1.51 (0.85, 2.66)    | 2.33 (1.58, 3.43)    | 3.55 (2.47, 5.07)    | 0.48 (0.23, 0.99)    | 0.12 (0.03, 0.39)    | 0.36 (0.15, 0.81)    | 0.66 (0.4, 1.08)     | 1.1 (0.75, 1.6)      |
|               |  | 2.97 (1.81, 4.84)    | 3.9 (2.85, 5.32)     | 4.99 (3.83, 6.49)    | 6.61 (5.34, 8.16)    | 8.48 (6.98, 10.25)   | 0.51 (0.22, 1.13)    | 1.01 (0.63, 1.59)    | 0.95 (0.55, 1.64)    | 1.77 (1.37, 2.29)    | 2.95 (2.37, 3.67)    |
|               |  | 4.56 (1.61, 12.27)   | 5.68 (4.25, 7.54)    | 7.27 (5.66, 9.28)    | 8.94 (7.26, 10.96)   | 12.46 (10.37, 14.9)  | .                    | 0.74 (0.4, 1.37)     | 0.72 (0.4, 1.29)     | 2.08 (1.59, 2.72)    | 3.81 (3.04, 4.76)    |
|               |  | .                    | 5.25 (3.2, 8.51)     | 7.51 (4.96, 11.21)   | 9.98 (7.38, 13.36)   | 13.18 (10.08, 17.06) | .                    | 0.99 (0.43, 2.26)    | 1.13 (0.49, 2.58)    | 2.61 (1.78, 3.81)    | 2.71 (1.88, 3.9)     |
|               |  | 2.28 (1.54, 3.38)    | 3.85 (3.21, 4.61)    | 4.93 (4.2, 5.78)     | 6.38 (5.63, 7.23)    | 8.72 (7.79, 9.76)    | 0.43 (0.25, 0.74)    | 0.65 (0.47, 0.9)     | 0.72 (0.52, 1.01)    | 1.62 (1.38, 1.9)     | 2.64 (2.31, 3.03)    |

**Figure S1.** Prevalence of BMI categories International cutoff

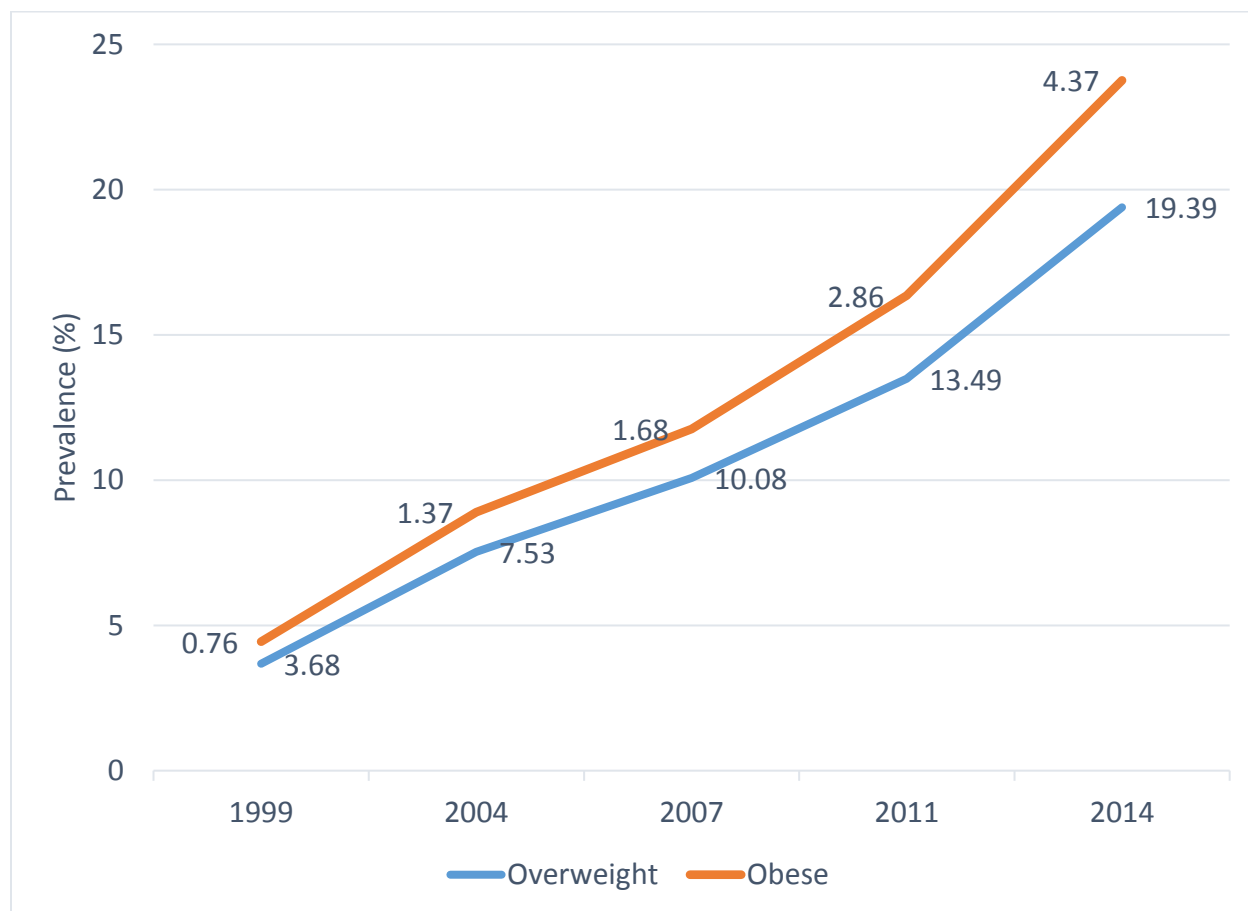

**Figure S2.** Prevalence of underweight, normal, overweight, and obesity by year and place of residence BDHS 1999-2014 (International cutoff).

(a) Urban

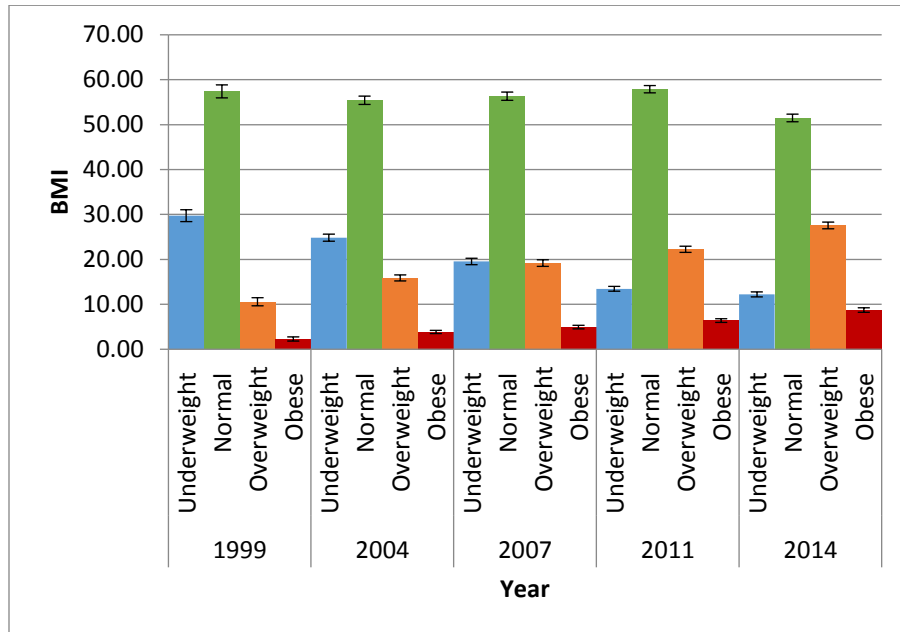

(b) Rural

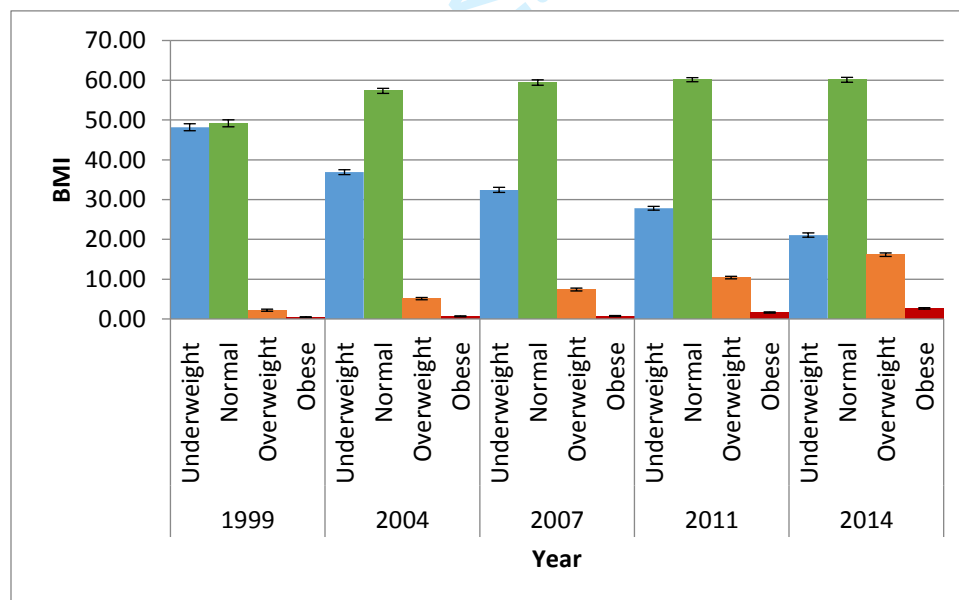

**STROBE 2007 (v4) Statement—Checklist of items that should be included in reports of *cross-sectional studies***

| Section/Topic                | Item # | Recommendation                                                                                                                                                                       | Reported on page # |
|------------------------------|--------|--------------------------------------------------------------------------------------------------------------------------------------------------------------------------------------|--------------------|
| Title and abstract           | 1      | (a) Indicate the study's design with a commonly used term in the title or the abstract                                                                                               | 2                  |
|                              |        | (b) Provide in the abstract an informative and balanced summary of what was done and what was found                                                                                  | 2                  |
| <b>Introduction</b>          |        |                                                                                                                                                                                      |                    |
| Background/rationale         | 2      | Explain the scientific background and rationale for the investigation being reported                                                                                                 | 4-6                |
| Objectives                   | 3      | State specific objectives, including any prespecified hypotheses                                                                                                                     | 5 - 6              |
| <b>Methods</b>               |        |                                                                                                                                                                                      |                    |
| Study design                 | 4      | Present key elements of study design early in the paper                                                                                                                              | 6                  |
| Setting                      | 5      | Describe the setting, locations, and relevant dates, including periods of recruitment, exposure, follow-up, and data collection                                                      | 6                  |
| Participants                 | 6      | (a) Give the eligibility criteria, and the sources and methods of selection of participants                                                                                          | 6-7                |
| Variables                    | 7      | Clearly define all outcomes, exposures, predictors, potential confounders, and effect modifiers. Give diagnostic criteria, if applicable                                             | 7                  |
| Data sources/<br>measurement | 8*     | For each variable of interest, give sources of data and details of methods of assessment (measurement). Describe comparability of assessment methods if there is more than one group | Not applicable     |
| Bias                         | 9      | Describe any efforts to address potential sources of bias                                                                                                                            | Not applicable     |
| Study size                   | 10     | Explain how the study size was arrived at                                                                                                                                            | 6                  |
| Quantitative variables       | 11     | Explain how quantitative variables were handled in the analyses. If applicable, describe which groupings were chosen and why                                                         | 8                  |
| Statistical methods          | 12     | (a) Describe all statistical methods, including those used to control for confounding                                                                                                | 8                  |
|                              |        | (b) Describe any methods used to examine subgroups and interactions                                                                                                                  | 8                  |
|                              |        | (c) Explain how missing data were addressed                                                                                                                                          | 6-8                |
|                              |        | (d) If applicable, describe analytical methods taking account of sampling strategy                                                                                                   | 8                  |

|                          |     |                                                                                                                                                                                                              |                |
|--------------------------|-----|--------------------------------------------------------------------------------------------------------------------------------------------------------------------------------------------------------------|----------------|
|                          |     | (e) Describe any sensitivity analyses                                                                                                                                                                        | 8              |
| <b>Results</b>           |     |                                                                                                                                                                                                              |                |
| Participants             | 13* | (a) Report numbers of individuals at each stage of study—eg numbers potentially eligible, examined for eligibility, confirmed eligible, included in the study, completing follow-up, and analysed            | 6- 9           |
|                          |     | (b) Give reasons for non-participation at each stage                                                                                                                                                         | Not applicable |
|                          |     | (c) Consider use of a flow diagram                                                                                                                                                                           | Not applicable |
| Descriptive data         | 14* | (a) Give characteristics of study participants (eg demographic, clinical, social) and information on exposures and potential confounders                                                                     | 9              |
|                          |     | (b) Indicate number of participants with missing data for each variable of interest                                                                                                                          | Not applicable |
| Outcome data             | 15* | Report numbers of outcome events or summary measures                                                                                                                                                         | 9-10           |
| Main results             | 16  | (a) Give unadjusted estimates and, if applicable, confounder-adjusted estimates and their precision (eg, 95% confidence interval). Make clear which confounders were adjusted for and why they were included | 12-13          |
|                          |     | (b) Report category boundaries when continuous variables were categorized                                                                                                                                    | 7              |
|                          |     | (c) If relevant, consider translating estimates of relative risk into absolute risk for a meaningful time period                                                                                             | 11-12          |
| Other analyses           | 17  | Report other analyses done—eg analyses of subgroups and interactions, and sensitivity analyses                                                                                                               | 12             |
| <b>Discussion</b>        |     |                                                                                                                                                                                                              |                |
| Key results              | 18  | Summarise key results with reference to study objectives                                                                                                                                                     | 13             |
| Limitations              | 19  | Discuss limitations of the study, taking into account sources of potential bias or imprecision. Discuss both direction and magnitude of any potential bias                                                   | 14-16          |
| Interpretation           | 20  | Give a cautious overall interpretation of results considering objectives, limitations, multiplicity of analyses, results from similar studies, and other relevant evidence                                   | 3, 14-16       |
| Generalisability         | 21  | Discuss the generalisability (external validity) of the study results                                                                                                                                        | 14-16          |
| <b>Other information</b> |     |                                                                                                                                                                                                              |                |
| Funding                  | 22  | Give the source of funding and the role of the funders for the present study and, if applicable, for the original study on which the present article is based                                                | Not applicable |

\*Give information separately for cases and controls in case-control studies and, if applicable, for exposed and unexposed groups in cohort and cross-sectional studies.

**Note:** An Explanation and Elaboration article discusses each checklist item and gives methodological background and published examples of transparent reporting. The STROBE checklist is best used in conjunction with this article (freely available on the Web sites of PLoS Medicine at <http://www.plosmedicine.org/>, Annals of Internal Medicine at <http://www.annals.org/>, and Epidemiology at <http://www.epidem.com/>). Information on the STROBE Initiative is available at [www.strobe-statement.org](http://www.strobe-statement.org).
